# Supplementary material for: Droplet image analysis with user-friendly freeware CellProfiler
Source: Royal Society of Chemistry journal article supplement (doi:10.1039/d0ay00031k), 2020-01-01
Supplement: d0ay00031k2.xlsx [file d0ay00031k2.xlsx]

## Sheet: Supplementary Table S1
Image Number	Droplet Number	Droplet Pixel Intensity
		Integrated	Lower Quartile	Maximum	Mean	Median	Minimum	Std	Upper Quartile
1	1	853.065	0.0301823	0.0405585	0.0323449	0.033051	0.0209049	0.00352312	0.0350652
1	2	934.704	0.0309758	0.0466621	0.0331314	0.0337987	0.021973	0.00334378	0.0356756
1	3	902.137	0.0301671	0.0457465	0.0326577	0.0333104	0.0216831	0.00382914	0.0357214
1	4	1601.64	0.0455482	0.158083	0.0613679	0.0572824	0.0215	0.0222734	0.073434
1	5	1634.72	0.0413367	0.181704	0.0636104	0.0517891	0.0218967	0.0299999	0.0847524
1	6	905.313	0.0306249	0.044831	0.032717	0.0334783	0.0215305	0.00346057	0.0354162
1	7	1588.86	0.0505379	0.159258	0.0647432	0.0623331	0.0222477	0.021883	0.074918
1	8	1614.45	0.0475013	0.156527	0.060957	0.0564889	0.0216068	0.0208448	0.0728008
1	9	1497.97	0.0437324	0.181292	0.057632	0.0526436	0.0219272	0.0224765	0.0643015
1	10	833.5	0.0301213	0.0539254	0.0324193	0.0330816	0.0210727	0.00361933	0.0351873
1	11	852.447	0.0304875	0.0419165	0.0329372	0.0337072	0.0209201	0.00376229	0.0359503
1	12	1569.21	0.0424582	0.193286	0.0635693	0.0528725	0.0220493	0.0294674	0.0811894
1	13	1647.64	0.0439155	0.173236	0.0629325	0.0533913	0.0216831	0.0276979	0.0803807
1	14	1575.35	0.0408026	0.177401	0.0621097	0.05066	0.0217441	0.0295558	0.0797436
1	15	831.697	0.0311742	0.0420844	0.033236	0.0339208	0.0214084	0.00326166	0.0357519
1	16	900.718	0.0310216	0.0418402	0.033205	0.0339208	0.0213779	0.003528	0.0359655
1	17	1662.64	0.0484169	0.183108	0.0642269	0.0578317	0.0222324	0.0240726	0.0775311
1	18	808.626	0.0299382	0.0412451	0.0324919	0.0331579	0.0200809	0.00374476	0.035523
1	19	1595.86	0.0407416	0.185168	0.0604768	0.0525063	0.0220035	0.0262464	0.0770123
1	20	1559.27	0.0481498	0.135317	0.0587317	0.0565652	0.0225071	0.016492	0.0669566
1	21	892.463	0.0315251	0.0485084	0.0336157	0.0343938	0.0220035	0.00357743	0.0362707
1	22	850.221	0.0305486	0.0437018	0.0326355	0.0333715	0.0215763	0.00331717	0.0351873
1	23	1694.64	0.0438849	0.173526	0.0612891	0.0530404	0.0217288	0.0258096	0.0754711
1	24	1564.31	0.0419699	0.166201	0.0618257	0.0533913	0.0223087	0.0269185	0.078645
1	25	1584.68	0.0450294	0.165347	0.0628741	0.0589303	0.0223392	0.0241917	0.0766308
1	26	875.684	0.0302434	0.0440681	0.0321553	0.0327916	0.0195926	0.0030681	0.0345006
1	27	818.031	0.0299077	0.0419928	0.0323588	0.0330663	0.0209506	0.00361706	0.0352636
1	28	1578.73	0.0443427	0.219348	0.0634512	0.0525826	0.0215	0.0293989	0.0779278
1	29	822.96	0.0303044	0.0527199	0.032358	0.0330205	0.0208896	0.00315668	0.0347601
1	30	1645.37	0.0462806	0.162097	0.0638708	0.0568093	0.0212406	0.0244703	0.0782559
1	31	791.68	0.029633	0.0411383	0.0320817	0.0327001	0.0211032	0.00345464	0.0348821
1	32	1549.22	0.0419165	0.163729	0.0607394	0.0534524	0.0223392	0.0250796	0.0749371
1	33	876.637	0.0298314	0.043183	0.0324764	0.0331426	0.0214084	0.00381715	0.0355688
1	34	1641.74	0.0425574	0.200549	0.0608324	0.0529793	0.0221103	0.0263357	0.07364
1	35	1672.97	0.0425727	0.222812	0.0615174	0.0513771	0.0225681	0.0293671	0.0738537
1	36	1649.23	0.0443046	0.17467	0.0619686	0.0542458	0.0221714	0.0253169	0.0751202
1	37	1585.94	0.0476081	0.16997	0.0630267	0.0579995	0.0199435	0.0231929	0.0758373
1	38	841.675	0.030396	0.0420233	0.0326712	0.0333562	0.0216373	0.0034367	0.0353399
1	39	1645.38	0.0458381	0.228916	0.0652565	0.0552377	0.022034	0.0294787	0.0797665
1	40	1606.68	0.0467994	0.164645	0.0610533	0.0580758	0.0228428	0.0214683	0.0712749
1	41	1798.09	0.0472114	0.210193	0.065466	0.0593729	0.0211337	0.0249935	0.0807965
1	42	1582.21	0.040238	0.215976	0.0607096	0.0504005	0.0218967	0.0281336	0.0789349
1	43	1598.67	0.0490883	0.203342	0.0705408	0.0587167	0.0228733	0.0309889	0.090425
1	44	876.019	0.0308385	0.0453956	0.0330586	0.0337377	0.0213626	0.00339675	0.0356909
1	45	1645.16	0.043122	0.160967	0.0601387	0.0539864	0.0220645	0.0243817	0.0747387
1	46	1642.29	0.0485237	0.167422	0.0658312	0.0633097	0.0221256	0.0234972	0.0799115
1	47	1645.2	0.0481727	0.1729	0.0645911	0.0588388	0.0212863	0.0247158	0.0779278
1	48	861.879	0.0306706	0.0419623	0.0326692	0.0333867	0.0211032	0.00318459	0.0351263
1	49	776.072	0.030396	0.043122	0.0325192	0.0332189	0.0214542	0.0032635	0.03505
1	50	1715.34	0.0469673	0.204395	0.0664911	0.0556497	0.0216678	0.0298196	0.0792172
1	51	842.052	0.0306554	0.042298	0.0328631	0.0336004	0.0208591	0.00336267	0.0354772
1	52	1594.1	0.0434577	0.199222	0.058439	0.0551766	0.0219425	0.0227083	0.0676204
1	53	964.25	0.032105	0.0631876	0.0348369	0.0355993	0.0217594	0.00437388	0.0380407
1	54	921.897	0.0332799	0.0509041	0.0358645	0.0365301	0.0212711	0.00411834	0.0386969
1	55	889.043	0.0314946	0.0581064	0.0335589	0.0342565	0.0205997	0.00353291	0.0360876
1	56	929.235	0.031632	0.0460517	0.0337646	0.0345464	0.0216068	0.00355907	0.0364385
1	57	1625.16	0.0510872	0.0866255	0.0589338	0.0619821	0.0212558	0.013739	0.0699321
1	58	1034.81	0.0349889	0.048661	0.0380334	0.0388037	0.0206455	0.00470877	0.0417945
1	59	1615.4	0.043534	0.183398	0.0593351	0.0539406	0.0219425	0.0238765	0.0716068
1	60	1889.54	0.0502785	0.192157	0.0720565	0.0640574	0.0230106	0.0299707	0.0904097
1	61	845.124	0.0305791	0.0413977	0.0328906	0.0337072	0.0212711	0.00351108	0.0356298
1	62	1721.63	0.0506447	0.162615	0.0715767	0.0631495	0.0225986	0.0286808	0.0913062
1	63	810.504	0.0296635	0.0405585	0.0317409	0.0323339	0.0210727	0.00306931	0.0341382
1	64	867.51	0.0304875	0.0424964	0.0327647	0.0334783	0.0215763	0.00343282	0.035462
1	65	1866.22	0.0480812	0.199619	0.0706796	0.0592966	0.0224002	0.0331464	0.0889296
1	66	1784.65	0.049958	0.236255	0.0732466	0.0628519	0.0222324	0.0332503	0.0913863
1	67	1592.38	0.0434882	0.186374	0.0648681	0.0578775	0.0222934	0.0283605	0.0814221
1	68	848	0.0298009	0.0411231	0.0324419	0.0332494	0.0202182	0.00391629	0.0355688
1	69	1057.33	0.0370794	0.0538186	0.0402011	0.0415351	0.0224002	0.00500405	0.0440986
1	70	907.99	0.0310674	0.0422522	0.0335052	0.0343481	0.0213779	0.00373876	0.0364538
1	71	860.92	0.030808	0.0480049	0.0330907	0.0339055	0.0204318	0.00369504	0.0358587
1	72	1609.63	0.0422065	0.161303	0.0610772	0.054551	0.0201114	0.0258519	0.0766995
1	73	975.087	0.0345006	0.0487221	0.0373883	0.0380865	0.0221103	0.00464281	0.0411841
1	74	969.514	0.0332799	0.107622	0.0359439	0.0366903	0.0209049	0.0051761	0.0388952
1	75	901.93	0.0305943	0.0441749	0.0328141	0.0336156	0.0209506	0.00345199	0.0355077
1	76	993.034	0.0337377	0.0460365	0.0362766	0.0370642	0.0208591	0.00419283	0.0396735
1	77	1878.33	0.0505989	0.236561	0.0738105	0.0641489	0.0227054	0.0336412	0.088426
1	78	1602.84	0.0443732	0.186862	0.0651322	0.0535592	0.0221256	0.0296018	0.0814794
1	79	846.821	0.0310826	0.0423285	0.0334646	0.0341802	0.0209354	0.00365259	0.0363165
1	80	885.298	0.0319524	0.048249	0.0342873	0.0351415	0.0216526	0.00393393	0.037232
1	81	1021.34	0.0354314	0.0508278	0.0386244	0.0398871	0.0217441	0.00496308	0.0426184
1	82	820.381	0.0293736	0.0458381	0.0317386	0.0323949	0.0198825	0.00350624	0.0344701
1	83	1768.53	0.0478676	0.201038	0.0680074	0.0596475	0.0216678	0.0284966	0.0847791
1	84	853.533	0.030808	0.0446632	0.033043	0.033814	0.0212863	0.0034603	0.0357519
1	85	949.586	0.0332952	0.0526589	0.0355703	0.0363165	0.0218967	0.00389343	0.0382849
1	86	889.059	0.0320134	0.0487221	0.0344183	0.0352331	0.0216983	0.00383364	0.0372931
1	87	1711.62	0.0423896	0.168368	0.0651998	0.0620279	0.0210727	0.0279776	0.0831311
1	88	1826.08	0.0471351	0.232685	0.0705949	0.0565957	0.0230106	0.0341902	0.0899214
1	89	1536.76	0.0437438	0.177554	0.0646483	0.0534218	0.0228428	0.0279161	0.0846571
1	90	1608.23	0.04477	0.182177	0.0665849	0.0579843	0.0228275	0.0283125	0.0868048
1	91	733.499	0.0295109	0.0486458	0.0314105	0.0319677	0.0216373	0.0028806	0.0335851
1	92	990.791	0.033341	0.0474556	0.03588	0.0366979	0.0209659	0.00414001	0.0389105
1	93	1636.62	0.0442969	0.17586	0.0616685	0.0545815	0.0227665	0.025641	0.0750324
1	94	1484.11	0.0445716	0.161486	0.0610142	0.056611	0.0230106	0.0221823	0.0751507
1	95	867.881	0.0315862	0.0454414	0.033956	0.034844	0.0209506	0.00374741	0.0368048
1	96	846.202	0.0317235	0.0488746	0.0339513	0.0347448	0.0210269	0.00362017	0.0366674
1	97	1625.18	0.0440833	0.175204	0.0620015	0.0541695	0.0220798	0.0259928	0.0761578
1	98	1616.46	0.0453956	0.170901	0.0662973	0.0624857	0.0221866	0.0248012	0.0862745
1	99	1576.75	0.0424048	0.148348	0.0636195	0.0552987	0.0230106	0.0261193	0.0849622
1	100	873.956	0.0308232	0.042649	0.0332088	0.0339971	0.0208591	0.00365554	0.0359808
1	101	832.875	0.0314488	0.0425422	0.0339049	0.0346227	0.0206149	0.00372833	0.03682
1	102	1420.27	0.0415961	0.193744	0.0580034	0.0499123	0.0229496	0.0257388	0.0666056
1	103	793.132	0.0311589	0.0517281	0.033603	0.0343481	0.0218967	0.00368034	0.0364691
1	104	843.086	0.0314336	0.0485389	0.0336803	0.0343938	0.0214847	0.00356996	0.0363775
1	105	834.821	0.0312657	0.0583047	0.0335095	0.0343328	0.0212406	0.00356	0.0362554
1	106	1503.21	0.0425116	0.168612	0.0602056	0.0527352	0.0225376	0.0245935	0.0727398
1	107	780.618	0.0305791	0.0423896	0.0330281	0.0337377	0.0216068	0.00362764	0.0358892
1	108	1573.44	0.0445563	0.184039	0.0637976	0.0535744	0.0195163	0.0285774	0.0794995
1	109	1501.02	0.0449836	0.139498	0.0592726	0.0576791	0.0217136	0.019527	0.0720989
1	110	859	0.0306706	0.048249	0.033111	0.0337835	0.0207828	0.0036832	0.0359808
1	111	824.237	0.0307012	0.0439765	0.0329945	0.0337377	0.0210422	0.00348647	0.0357061
1	112	1539.02	0.0419623	0.148409	0.0612791	0.0552529	0.0210269	0.0251666	0.0758068
1	113	1624.4	0.0553902	0.091371	0.06356	0.0666056	0.0223392	0.0140535	0.0746624
1	114	1237.28	0.0360418	0.162982	0.0511652	0.0452125	0.0209201	0.0215452	0.0601434
1	115	1573.53	0.0507515	0.147646	0.061406	0.059205	0.0224765	0.0182545	0.0700236
1	116	812.083	0.0303349	0.0433356	0.0326033	0.0332799	0.0213474	0.0033933	0.0352636
1	117	843.736	0.0304265	0.0429389	0.0328891	0.0335851	0.0213321	0.00361417	0.0357977
1	118	750.606	0.0281987	0.040238	0.0299943	0.0304265	0.0209659	0.00264098	0.0320134
1	119	875.526	0.0309606	0.0502022	0.0332748	0.0338293	0.0214237	0.00351196	0.0359655
1	120	1648.57	0.0444381	0.174563	0.0652717	0.0596017	0.0222324	0.0261987	0.0831769
2	1	650.627	0.0264286	0.0352178	0.0285038	0.0289464	0.0207065	0.00267768	0.0306401
2	2	1344.97	0.0349279	0.215137	0.0555634	0.0423896	0.021912	0.0302448	0.0690089
2	3	525.956	0.0252537	0.0370794	0.0269943	0.0271916	0.0203098	0.00221884	0.0287327
2	4	1209.9	0.0331273	0.199222	0.0509132	0.0393683	0.0216373	0.0278666	0.0617685
2	5	760.86	0.0282902	0.0375067	0.0305076	0.0311894	0.0205081	0.00309049	0.0329747
2	6	695.673	0.0284733	0.0376745	0.0306033	0.0312352	0.0207065	0.00304957	0.0330205
2	7	1285.59	0.0420539	0.0911574	0.0470602	0.0493477	0.0216526	0.00910886	0.0538796
2	8	741.435	0.027924	0.0369116	0.0300383	0.0306706	0.0212406	0.00296562	0.0324102
2	9	848.604	0.0305486	0.040528	0.0327634	0.0336156	0.02121	0.00347443	0.0354772
2	10	794.795	0.0279545	0.0379797	0.0301378	0.0307774	0.0205997	0.00302494	0.0325628
2	11	788.31	0.029984	0.0472572	0.0322365	0.0330816	0.0205844	0.0034289	0.0348669
2	12	1297.06	0.0435187	0.0648203	0.0474158	0.0498665	0.0204929	0.00821926	0.0532845
2	13	748.572	0.0270848	0.0362707	0.0292103	0.0297704	0.0206302	0.00283392	0.0314946
2	14	754.909	0.0286717	0.0382849	0.0307161	0.031342	0.0210117	0.00302425	0.0330968
2	15	633.53	0.0259861	0.0340734	0.0278634	0.0282139	0.0205081	0.00245689	0.0298161
2	16	762.903	0.0282597	0.0373693	0.0304443	0.0311894	0.0203708	0.00306233	0.0328527
2	17	503.592	0.0251011	0.0324712	0.0266183	0.0268101	0.0202487	0.00195623	0.0281376
2	18	1304.32	0.0324865	0.221546	0.0529156	0.0404822	0.0210117	0.0288053	0.0699016
2	19	1309.76	0.0322271	0.171649	0.0527067	0.0403143	0.0214847	0.0269551	0.070367
2	20	1400.33	0.0347906	0.21828	0.0562606	0.0427253	0.0211032	0.0305421	0.0728389
2	21	711.302	0.0277867	0.0379492	0.0300305	0.0305943	0.0198825	0.00307085	0.032517
2	22	750.004	0.0294804	0.0438239	0.0316979	0.0324254	0.0214389	0.00324164	0.0342718
2	23	1285.91	0.0320439	0.199237	0.0512763	0.0402228	0.0210575	0.0291809	0.0591897
2	24	1270.67	0.0446784	0.0752422	0.050776	0.0533913	0.0209354	0.0101944	0.0586099
2	25	1233.08	0.0314641	0.213519	0.0510971	0.0396582	0.0206149	0.031219	0.056199
2	26	803.565	0.0285039	0.037644	0.0306237	0.0313268	0.0205997	0.00300368	0.0330053
2	27	698.192	0.0265354	0.0352178	0.0286062	0.0290608	0.0197604	0.00269404	0.0307927
2	28	687.175	0.0276951	0.0416419	0.0299006	0.0304112	0.0214237	0.00301688	0.0323644
2	29	687.524	0.0280308	0.0368811	0.0302541	0.0308537	0.0196994	0.00305094	0.0327153
2	30	1379.78	0.0330968	0.226062	0.0530419	0.041413	0.0210575	0.0278087	0.0658579
2	31	767.418	0.0297246	0.0960403	0.0319225	0.032578	0.0209812	0.00392953	0.034287
2	32	1362.86	0.0445258	0.0742351	0.0494884	0.0518196	0.0217441	0.00925376	0.0563363
2	33	1311.58	0.0352941	0.17821	0.0543795	0.0456168	0.0219272	0.0261828	0.0668803
2	34	1263.85	0.0355993	0.118181	0.0490722	0.0460059	0.0213474	0.0173143	0.0600137
2	35	1284.17	0.0331731	0.223804	0.0506475	0.0396124	0.020798	0.0308645	0.0523728
2	36	1255.55	0.0319677	0.235035	0.0501638	0.0406348	0.0207523	0.0259663	0.0628519
2	37	780.418	0.0288548	0.0411994	0.0309064	0.0316014	0.019852	0.00303963	0.0332647
2	38	723.255	0.026627	0.0352178	0.028533	0.0289921	0.0209049	0.00256876	0.0305791
2	39	1393.25	0.0406195	0.15967	0.0515482	0.0489357	0.0208743	0.0190501	0.0553902
2	40	1395.24	0.0345922	0.200351	0.0545335	0.047303	0.0205081	0.0250556	0.0689517
2	41	788.561	0.0302281	0.0455177	0.0323818	0.0332189	0.0210117	0.00332447	0.0349432
2	42	761.596	0.0288853	0.0397803	0.0312181	0.0318914	0.0202487	0.003246	0.033814
2	43	1329.11	0.037705	0.141543	0.0509862	0.0483406	0.021973	0.0175407	0.0598917
2	44	1326.16	0.0319524	0.205081	0.0508515	0.0387427	0.0208591	0.0284201	0.0626688
2	45	1267.65	0.0344625	0.216342	0.0534018	0.0405585	0.0220951	0.0323445	0.058732
2	46	725.034	0.0276493	0.056199	0.0299082	0.030457	0.0200809	0.00308117	0.0324102
2	47	841.011	0.0298924	0.0419623	0.031946	0.0327459	0.0194858	0.00319684	0.0343633
2	48	687.708	0.0270695	0.0365148	0.0294194	0.0298924	0.0211032	0.00301569	0.0318914
2	49	847.305	0.0301366	0.0420844	0.0323337	0.0330816	0.02121	0.00340725	0.0349584
2	50	837.281	0.0302281	0.0424964	0.0324742	0.0332341	0.0195773	0.00344266	0.0351415
2	51	1466.86	0.0381628	0.21619	0.0556725	0.0479591	0.0211337	0.0279963	0.0604715
2	52	1325.44	0.0471504	0.0727703	0.051795	0.0543984	0.0216068	0.00959898	0.0587625
2	53	853.914	0.0298619	0.0580301	0.0323171	0.0330816	0.0194858	0.00354134	0.0350805
2	54	794.887	0.0301518	0.0537728	0.0322116	0.0330053	0.0213169	0.00324518	0.0346838
2	55	1255.97	0.0436408	0.0706645	0.0490366	0.0509957	0.0212711	0.00932728	0.0562295
2	56	1345.34	0.0361791	0.232792	0.0535756	0.0422217	0.0226291	0.0311193	0.0530938
2	57	751.684	0.0276799	0.0373541	0.0300217	0.0305943	0.0208133	0.00309319	0.0325322
2	58	1320.63	0.0371405	0.182437	0.0545963	0.0455177	0.0218509	0.0248648	0.0673838
2	59	1285.07	0.0309148	0.197818	0.0508314	0.0381476	0.020798	0.0282189	0.0638857
2	60	909.987	0.0312352	0.0452277	0.033595	0.0344396	0.0218051	0.0036646	0.0364233
2	61	887.872	0.0310063	0.0446632	0.0336201	0.0344854	0.0212558	0.00390646	0.0366522
2	62	1294.74	0.0363165	0.221164	0.0570145	0.0467842	0.0215457	0.0298739	0.0680858
2	63	847.033	0.0308385	0.0438697	0.0335419	0.0342718	0.0205997	0.00396005	0.0367132
2	64	1250.23	0.0464332	0.107713	0.052019	0.0537423	0.0222782	0.00990596	0.0586862
2	65	793.912	0.0302434	0.0631418	0.0323531	0.0331121	0.0205997	0.00333476	0.0348363
2	66	1456.82	0.0367895	0.259831	0.0561244	0.0454414	0.0220188	0.0308468	0.0634394
2	67	1266.17	0.0335851	0.254246	0.0517796	0.0400549	0.0214542	0.0330071	0.0531777
2	68	1394.56	0.037232	0.210437	0.0553858	0.0450904	0.0225528	0.0267138	0.0665293
2	69	1311.75	0.0357061	0.185733	0.0483381	0.0441138	0.0209812	0.0198955	0.0541543
2	70	1423.4	0.0365454	0.227268	0.0562385	0.0430152	0.0218357	0.0338367	0.0618753
2	71	1480.59	0.0437324	0.265049	0.0572164	0.0511788	0.0222324	0.0247623	0.062501
2	72	653.846	0.0264439	0.0353552	0.028561	0.0289921	0.019791	0.00273661	0.0307622
2	73	907.834	0.0312657	0.0492256	0.0337849	0.0347295	0.0217899	0.00381619	0.0367742
2	74	1258.04	0.035111	0.188891	0.0549265	0.0432441	0.0197299	0.0279188	0.0675669
2	75	773.399	0.0296178	0.0458076	0.0318625	0.0326467	0.0203403	0.0033726	0.0345159
2	76	1508.97	0.0417792	0.213794	0.0565728	0.048188	0.0224002	0.0292821	0.0558633
2	77	885.961	0.0306706	0.0517739	0.0331535	0.0339666	0.0213321	0.00377047	0.0360876
2	78	794.625	0.0300603	0.051606	0.0320918	0.0328832	0.0213779	0.00326751	0.0344854
2	79	1370.3	0.0476997	0.0838941	0.0541854	0.0563363	0.0230106	0.0105081	0.0622721
2	80	1377.72	0.0352483	0.155505	0.050418	0.0437171	0.0219577	0.0212047	0.0610666
2	81	1527.18	0.0372778	0.221027	0.0606287	0.0455329	0.0216068	0.0343514	0.0755779
2	82	801.886	0.0284123	0.0504311	0.0308525	0.0315251	0.0198062	0.00336196	0.0335546
2	83	612.576	0.0259251	0.0345312	0.027814	0.0281224	0.0205539	0.00245733	0.0297704
2	84	1433.86	0.0379492	0.239826	0.0550151	0.0469062	0.0218967	0.0309793	0.0573281
2	85	1374.54	0.0349432	0.209949	0.054802	0.0444343	0.0210727	0.0274172	0.0676585
2	86	858.592	0.0306706	0.0459449	0.0329784	0.0338598	0.0216678	0.00354576	0.0357214
2	87	1403.18	0.0412146	0.195483	0.0551434	0.0485542	0.0222324	0.0257359	0.0565042
2	88	719.188	0.0294804	0.0408789	0.0320608	0.0328527	0.0210727	0.00369249	0.0350652
2	89	1342.3	0.0331273	0.181964	0.0530951	0.0397955	0.021622	0.0306593	0.0632906
2	90	1191.53	0.0331388	0.222187	0.0509049	0.0397803	0.0214847	0.0286589	0.0568589
2	91	787.333	0.0286564	0.0404364	0.0309462	0.0315862	0.0215457	0.00317079	0.0334783
2	92	806.674	0.029572	0.042237	0.031507	0.0322576	0.0213169	0.00304743	0.033814
2	93	1221.19	0.0315709	0.196017	0.0503086	0.0398871	0.02121	0.028317	0.057763
2	94	737.189	0.0290227	0.0379644	0.0310853	0.0318151	0.0213474	0.0030613	0.0334783
2	95	766.518	0.0301518	0.0404212	0.0322351	0.0331121	0.0210117	0.0033589	0.0348363
2	96	1316.2	0.0330854	0.20296	0.0508321	0.0396582	0.0218357	0.0288373	0.0579385
2	97	796.503	0.0297704	0.039765	0.0318321	0.0326696	0.0211185	0.00318835	0.0342718
2	98	800.855	0.0291905	0.0385138	0.0315025	0.0322423	0.021149	0.0032695	0.0341039
2	99	1323.08	0.0350195	0.186374	0.0538208	0.043183	0.0217594	0.0266537	0.0677195
2	100	1250.21	0.0335393	0.207507	0.0503427	0.0395819	0.0217136	0.0278012	0.0552224
2	101	1301.89	0.0335546	0.206516	0.0532929	0.040528	0.0217594	0.0296302	0.0652323
2	102	1362.92	0.0356146	0.199054	0.0533058	0.0445563	0.0221866	0.0257083	0.0632944
2	103	1251.02	0.0327001	0.201465	0.0507205	0.0381933	0.0215915	0.0295504	0.056466
2	104	1311.43	0.037644	0.164126	0.049086	0.0451667	0.0220035	0.0184007	0.0543069
2	105	792.046	0.0285496	0.0373693	0.0305361	0.03122	0.0213169	0.00286173	0.0327764
2	106	1134.88	0.0320745	0.144244	0.0454843	0.037705	0.0197147	0.0196541	0.0547112
2	107	733.892	0.0294804	0.0403601	0.0317317	0.032578	0.0209506	0.00335013	0.0343633
2	108	1298.68	0.0319066	0.174502	0.0517566	0.0384375	0.0210575	0.0283108	0.0669566
2	109	760.688	0.0295262	0.0481117	0.0316071	0.0324102	0.0213626	0.00314905	0.0340429
2	110	775.083	0.0281834	0.0377356	0.0303716	0.0310521	0.0195163	0.0030447	0.0328069
2	111	1269.55	0.044358	0.0710613	0.049027	0.0515602	0.0221714	0.00901101	0.0557412
2	112	1234.66	0.0343175	0.187961	0.0478087	0.0423133	0.0211185	0.019493	0.0567597
2	113	694.652	0.0270237	0.0374151	0.0293945	0.0298161	0.0203708	0.00303332	0.0319066
2	114	738.918	0.0286717	0.0430762	0.0308448	0.0315557	0.0209506	0.0031094	0.0333104
2	115	1102.22	0.0295415	0.15314	0.0459624	0.0352178	0.0210727	0.0239366	0.0558785
2	116	1226.77	0.0427138	0.0658427	0.0468213	0.0489662	0.0219272	0.00831096	0.052781
2	117	742.162	0.0282597	0.0416114	0.0303903	0.0310369	0.0209506	0.00300668	0.0327764
2	118	1324.51	0.0345006	0.211185	0.055188	0.0424048	0.0215305	0.0303207	0.0691691
2	119	1248.9	0.0319066	0.216205	0.0483753	0.0373541	0.0203708	0.0281867	0.0528573
2	120	753.295	0.0292515	0.0544747	0.0312817	0.0320439	0.0212253	0.00312086	0.0336461
2	121	729.752	0.0276493	0.0366979	0.0298565	0.0304875	0.0211337	0.00297858	0.0322576
2	122	1277.28	0.0335317	0.236347	0.0525672	0.0419165	0.020798	0.0286009	0.0606851
2	123	786.455	0.0288243	0.0701762	0.0309933	0.0316625	0.0214542	0.0031989	0.0334173
2	124	1025.19	0.0285649	0.173312	0.0446066	0.0342107	0.0202182	0.0232864	0.0543069
3	1	784.127	0.0292821	0.0452277	0.0316206	0.0323033	0.0210575	0.00342564	0.0343023
3	2	557.575	0.025864	0.0367437	0.0277318	0.027985	0.0201724	0.00241158	0.0296635
3	3	814.536	0.0319371	0.0716411	0.0338698	0.0346075	0.0211337	0.00341677	0.0362707
3	4	846.983	0.0339818	0.0606088	0.0361835	0.0369268	0.022446	0.00399455	0.0387732
3	5	1473.93	0.0403143	0.177218	0.0601285	0.0491798	0.0209659	0.0280985	0.0759594
3	6	1332.31	0.0366522	0.155383	0.0511874	0.047303	0.0199588	0.0202734	0.0603189
3	7	1568.74	0.0444038	0.225223	0.0632708	0.0541085	0.0228122	0.0287326	0.0761425
3	8	1552.1	0.0434424	0.204761	0.0596593	0.0530556	0.0222477	0.0238319	0.0716411
3	9	775.477	0.0297856	0.0441749	0.0318851	0.0325475	0.0214847	0.00321574	0.0343786
3	10	890.326	0.0333562	0.0524758	0.035301	0.0360418	0.0222324	0.00355329	0.0377203
3	11	1604.03	0.0467842	0.194873	0.0687273	0.0550851	0.0229648	0.0346753	0.0796406
3	12	1537.51	0.0418555	0.224491	0.0611919	0.0489815	0.0230106	0.0311863	0.0725567
3	13	1612.81	0.0453956	0.162341	0.0630717	0.0556649	0.0222629	0.0266262	0.0738689
3	14	731.42	0.0274357	0.0386816	0.0295201	0.0300145	0.0205844	0.00284414	0.0317693
3	15	1504.32	0.0415656	0.173007	0.0631564	0.0499428	0.0225834	0.0311691	0.0814221
3	16	1542.08	0.0477913	0.25391	0.0685431	0.0574197	0.0223392	0.0302167	0.0840162
3	17	1417.05	0.0402991	0.199252	0.0594551	0.048127	0.0225528	0.027477	0.0757076
3	18	1562.59	0.0386816	0.203204	0.0599888	0.0489357	0.0219577	0.0303607	0.0731975
3	19	807.698	0.0317082	0.0462196	0.0337004	0.0345006	0.0213474	0.00336792	0.0361639
3	20	826.9	0.0309453	0.0437781	0.0329508	0.0336767	0.0217441	0.00324227	0.0354314
3	21	1578.29	0.0408141	0.186297	0.0616543	0.0499123	0.0209201	0.0298487	0.0778058
3	22	873.337	0.0328985	0.0751202	0.0346879	0.0354162	0.0216068	0.00361691	0.0368658
3	23	866.594	0.0317082	0.0481117	0.0335006	0.0342565	0.0213779	0.00326008	0.0357824
3	24	1578.54	0.0449226	0.217319	0.0676062	0.0522011	0.0218357	0.0372742	0.0783818
3	25	785.934	0.0316014	0.0442817	0.0344632	0.0352941	0.0214847	0.00432639	0.0378576
3	26	1368.12	0.0358587	0.168307	0.0558028	0.0444953	0.021149	0.0288356	0.0688792
3	27	1393.5	0.0412451	0.169741	0.0581957	0.0493324	0.0215305	0.0256433	0.0691806
3	28	1507.36	0.0531472	0.163775	0.0638144	0.0616617	0.0223239	0.0170493	0.0732586
3	29	838.198	0.0305028	0.0437781	0.0324946	0.0332189	0.0216831	0.00324882	0.0349279
3	30	838.491	0.0300145	0.0403906	0.0320954	0.0328374	0.0213779	0.00317669	0.0345617
3	31	791.185	0.0318608	0.0454414	0.033676	0.0344396	0.021912	0.003203	0.0360266
3	32	804.098	0.0307164	0.0462654	0.0328847	0.0336461	0.0215763	0.00347029	0.0355535
3	33	796.18	0.0297093	0.041825	0.0319162	0.0326696	0.0209964	0.00331195	0.0345312
3	34	830.573	0.0328679	0.0428321	0.0348249	0.0356603	0.022385	0.00347426	0.0373388
3	35	902.989	0.0348821	0.0569772	0.0367711	0.0375067	0.0222782	0.00372359	0.039353
3	36	726.476	0.0276341	0.0371405	0.0298986	0.030457	0.0198215	0.00302808	0.0323339
3	37	1501.61	0.0420233	0.219379	0.0615338	0.0494087	0.0222934	0.0297998	0.0766041
3	38	813.164	0.0308385	0.0448463	0.0327229	0.0335851	0.0207218	0.00333262	0.0351568
3	39	843.27	0.0298009	0.0432288	0.032061	0.0327916	0.0214389	0.00335374	0.034699
3	40	1540.79	0.0413825	0.213352	0.0607903	0.0477913	0.0228275	0.032352	0.0678035
3	41	893.136	0.0316625	0.0438849	0.0337657	0.0345617	0.021561	0.00349183	0.0363775
3	42	1379.05	0.0412299	0.204578	0.0581903	0.049012	0.021912	0.0271475	0.0674182
3	43	873.516	0.0300755	0.0406806	0.0322414	0.03299	0.019501	0.0033232	0.0348516
3	44	867.918	0.0317235	0.0525368	0.0337803	0.0345159	0.0217288	0.00344958	0.036286
3	45	808.699	0.0325628	0.0527352	0.0343732	0.0351263	0.0214237	0.00326805	0.0366674
3	46	877.439	0.0305638	0.0407416	0.0327439	0.0335699	0.0210269	0.00338066	0.0353552
3	47	843.796	0.0288853	0.0443885	0.0309866	0.0316014	0.0207065	0.00306745	0.0333867
3	48	1559.59	0.0443885	0.198886	0.0630954	0.0546273	0.0223239	0.0268867	0.0783093
3	49	1454.18	0.0464027	0.245594	0.0647885	0.0552071	0.0219577	0.032339	0.0703441
3	50	856.969	0.0314031	0.0428321	0.0337882	0.0346227	0.0209964	0.00379635	0.0366979
3	51	851.205	0.0323491	0.0611276	0.0341794	0.0348669	0.0218204	0.00343996	0.0363775
3	52	1534.52	0.0411383	0.182147	0.0591338	0.0505989	0.0210422	0.02809	0.0684672
3	53	1620.08	0.0523842	0.181689	0.0652521	0.0604715	0.0221103	0.0216303	0.0748913
3	54	857.734	0.0319524	0.0471199	0.0342792	0.0350347	0.0213016	0.00373781	0.0370947
3	55	838.999	0.0304265	0.0476692	0.0324879	0.0331426	0.0208896	0.00321705	0.0349889
3	56	1486.03	0.0553597	0.200641	0.0636472	0.0637217	0.0230259	0.0177719	0.0685893
3	57	902.84	0.0330816	0.0511788	0.0352727	0.0361028	0.0214389	0.00365764	0.0378424
3	58	1635.53	0.0409094	0.192584	0.0618978	0.0492943	0.0229038	0.0311729	0.0779774
3	59	1586.24	0.0509575	0.189776	0.0703807	0.064332	0.0229801	0.0272622	0.083238
3	60	843.463	0.032929	0.0437629	0.0348611	0.0356756	0.021622	0.00349389	0.0373236
3	61	1486.58	0.0517891	0.0859998	0.057095	0.0596017	0.0218509	0.0111488	0.0653849
3	62	1672.11	0.0488136	0.232731	0.0672775	0.0587472	0.0218357	0.0307328	0.076318
3	63	874.307	0.0327459	0.0488289	0.0345931	0.0353552	0.0228275	0.00329986	0.0369116
3	64	857.569	0.0305638	0.0518196	0.0324849	0.0331884	0.0217288	0.00313888	0.0347753
3	65	1392.64	0.0423743	0.212497	0.0634603	0.0492256	0.0229801	0.0347121	0.0721294
3	66	1628.9	0.0468681	0.231846	0.0655071	0.0570993	0.0222324	0.0295624	0.0773861
3	67	1593.31	0.0407721	0.19202	0.0625538	0.0500343	0.0217136	0.0313412	0.0791218
3	68	1559.37	0.0539101	0.206989	0.0648334	0.0615244	0.0230106	0.022817	0.0666819
3	69	1712.46	0.0449989	0.208438	0.0712426	0.0569467	0.0229801	0.0362451	0.0904211
3	70	1628.63	0.0503548	0.191928	0.0701332	0.0591135	0.0230259	0.0297827	0.0849165
3	71	947.771	0.0340581	0.0569924	0.0365568	0.037232	0.0211185	0.00415488	0.0399786
3	72	1599.55	0.0447814	0.249409	0.0635172	0.0520714	0.0223087	0.032664	0.0691234
3	73	1522.95	0.0377966	0.196674	0.058627	0.0467994	0.0210727	0.0303489	0.071458
3	74	969.53	0.0343633	0.0606699	0.0369345	0.037644	0.022034	0.0042313	0.0402991
3	75	878.563	0.0325933	0.0445716	0.0342173	0.0349737	0.0213931	0.00310961	0.0363928
3	76	882.478	0.0305486	0.0414282	0.0323857	0.033051	0.0211795	0.0030405	0.034699
3	77	808.168	0.0325628	0.0425879	0.0343858	0.0352331	0.0224155	0.00325916	0.0367437
3	78	1537.39	0.0433356	0.240452	0.0635785	0.0527047	0.0218357	0.0337401	0.0704623
3	79	1541.36	0.0430152	0.194675	0.0604287	0.0527657	0.0215915	0.0274661	0.0672808
3	80	884.312	0.034165	0.095201	0.0361889	0.0367895	0.0220645	0.00417368	0.0383764
3	81	762.497	0.0284886	0.0370336	0.030478	0.0310216	0.0211337	0.0028569	0.0327459
3	82	1601.49	0.0413519	0.214145	0.0646255	0.0489509	0.0224002	0.036477	0.0774472
3	83	1520.76	0.052903	0.0798047	0.0573611	0.059617	0.0230411	0.00945044	0.0641337
3	84	1493.22	0.0572213	0.0903487	0.0625879	0.0655833	0.0230564	0.0117304	0.0710307
3	85	783.382	0.0288701	0.0387884	0.0309429	0.0315251	0.0214542	0.00304772	0.0333715
3	86	1394.73	0.0397498	0.210269	0.0597646	0.0467994	0.0224002	0.030824	0.0715
3	87	1544.39	0.0542611	0.0836194	0.0600861	0.0632181	0.0230106	0.0112377	0.0683604
3	88	1428.08	0.0425422	0.232502	0.0618428	0.049134	0.0225986	0.0318483	0.0702831
3	89	822.805	0.0289921	0.0448768	0.0308259	0.0314183	0.0209354	0.00280757	0.0329747
3	90	819.85	0.0317693	0.0513466	0.0339384	0.0347753	0.0217441	0.00366055	0.0366331
3	91	1469.2	0.0605631	0.0942397	0.0654314	0.0685435	0.0224308	0.0112839	0.0733501
3	92	799.236	0.0298466	0.0397498	0.0318993	0.0326085	0.0208896	0.00312818	0.0343175
3	93	860.913	0.0315099	0.0416266	0.0331643	0.0339513	0.0215	0.00302708	0.0353246
3	94	1289.31	0.0379034	0.166476	0.0498475	0.046128	0.0216068	0.0185472	0.0568093
3	95	850.159	0.0312352	0.0465858	0.0329238	0.0336614	0.0215152	0.00296247	0.0350652
3	96	774.086	0.0296178	0.0458228	0.0315992	0.0322499	0.0212253	0.00304941	0.0339666
3	97	1319.57	0.0413977	0.173709	0.0590149	0.0481117	0.0223087	0.0267557	0.071519
3	98	1211.6	0.0320287	0.168551	0.0506375	0.0380713	0.0218662	0.0268281	0.0637217
3	99	811.433	0.0297398	0.0432136	0.0314851	0.032166	0.0212558	0.00286209	0.0336309
3	100	1268.87	0.0396887	0.191043	0.0570793	0.0463874	0.0226139	0.0278502	0.0646983
3	101	760.788	0.0281071	0.036286	0.0298068	0.0303044	0.0203555	0.00257083	0.0317998
3	102	1479.24	0.0422065	0.223804	0.0653028	0.051606	0.022858	0.0333365	0.0818799
3	103	756.722	0.0289921	0.0640879	0.0308137	0.0313878	0.0208133	0.00286181	0.0329595
3	104	821.337	0.0284581	0.0357671	0.0300142	0.030518	0.0211795	0.00250733	0.0319066
3	105	1293.92	0.0343023	0.205341	0.0523009	0.0403754	0.0205081	0.0303779	0.0576791
3	106	1126.91	0.0335699	0.145769	0.0449434	0.0393683	0.0220798	0.0186233	0.0494392
3	107	790.982	0.0306096	0.0603799	0.0322009	0.0327916	0.0203098	0.002885	0.0341955
3	108	1219.04	0.0323033	0.144869	0.0493858	0.0382544	0.0214694	0.0249437	0.0624247
3	109	1288.95	0.0371862	0.195285	0.0566522	0.0443427	0.0214237	0.0280915	0.0702068
3	110	816.326	0.033463	0.045243	0.0353924	0.0362554	0.0217136	0.0035787	0.0379644
3	111	1167.47	0.0347753	0.149111	0.0474312	0.0420691	0.0220035	0.0179022	0.0577325
3	112	726.503	0.027863	0.041001	0.0294345	0.0299077	0.0215915	0.00240307	0.0312505
3	113	747.373	0.027451	0.03505	0.0291192	0.0295567	0.0212253	0.00240279	0.0309911
3	114	1215	0.0342947	0.163378	0.0491784	0.0392157	0.0216068	0.0271686	0.0506447
3	115	530.283	0.0246281	0.0307469	0.0258523	0.0260014	0.018555	0.00165048	0.0270695
3	116	1271.42	0.0311131	0.147509	0.0516334	0.0361791	0.0210117	0.0281701	0.0704509
3	117	1198.19	0.0339818	0.157702	0.0500666	0.04094	0.0225681	0.0227315	0.0610666
3	118	980.098	0.0292668	0.134035	0.0421348	0.0345159	0.0195315	0.01836	0.0503815
3	119	1290.74	0.0395056	0.162966	0.0554607	0.0460822	0.0222782	0.0243135	0.0655375
3	120	835.481	0.0326238	0.0493935	0.034206	0.0349889	0.0219272	0.00312947	0.0364233
3	121	1171.8	0.032166	0.141543	0.0488293	0.0389258	0.0212863	0.0232177	0.0586709
3	122	1052.22	0.0301213	0.129625	0.0440977	0.0358587	0.0214542	0.0192618	0.0542611
3	123	1299.75	0.0435149	0.168887	0.0582247	0.0510414	0.0227359	0.0235042	0.0663462
3	124	690.979	0.0276951	0.0374456	0.0293671	0.0298619	0.0214694	0.00247093	0.0312657
3	125	1141.5	0.0328679	0.152163	0.0458157	0.0376135	0.0207675	0.0215031	0.0501411
3	126	1235.13	0.0327764	0.146136	0.0502169	0.0425727	0.0214084	0.0216468	0.065568
3	127	935.25	0.0280308	0.129961	0.039181	0.0311589	0.0202182	0.0178861	0.0444648
3	128	729.022	0.0290532	0.0381323	0.0308242	0.0312963	0.0208286	0.00284618	0.0329137
3	129	692.475	0.0270237	0.0345922	0.0286502	0.0291142	0.0205081	0.00238017	0.0305028
4	1	736.975	0.0270237	0.037171	0.0294531	0.0298161	0.0206149	0.00305855	0.0319677
4	2	895.804	0.0297246	0.0678874	0.0328989	0.0332494	0.0215152	0.0039418	0.0360876
4	3	1525.5	0.041062	0.163394	0.0602298	0.0538949	0.0217746	0.0259424	0.073106
4	4	925.509	0.0292515	0.0494392	0.0324262	0.0328374	0.0210422	0.00398083	0.0356756
4	5	1594.77	0.0452888	0.195544	0.0629025	0.0571145	0.0230411	0.0238778	0.0762798
4	6	1636.74	0.052491	0.0898299	0.0618572	0.0635691	0.0230106	0.0130372	0.0726024
4	7	955.241	0.0288243	0.0508278	0.0319201	0.0325017	0.0200961	0.00391151	0.035172
4	8	1400.92	0.0465553	0.0935836	0.0544618	0.0552377	0.0220645	0.0118287	0.0630655
4	9	1595.09	0.0449531	0.181537	0.06335	0.0559548	0.0230411	0.0275815	0.073106
4	10	873.867	0.0300755	0.0631723	0.0333232	0.0337987	0.0220798	0.00409477	0.0365759
4	11	1503.97	0.0420996	0.192203	0.0605485	0.0543984	0.0217441	0.0269467	0.0702068
4	12	918.54	0.0311017	0.0531777	0.0345667	0.0350042	0.0220188	0.00442123	0.0380255
4	13	703.293	0.0265354	0.0371405	0.029003	0.0292821	0.0197299	0.00311935	0.0315404
4	14	1713.3	0.0523995	0.136095	0.0651594	0.0642405	0.0230106	0.0179679	0.0742733
4	15	1658.4	0.044007	0.180774	0.063979	0.0569467	0.0230106	0.0261576	0.079984
4	16	870.356	0.0291142	0.0424201	0.0325768	0.0329442	0.0214694	0.00415088	0.0361028
4	17	1531.61	0.0523995	0.0903487	0.0597235	0.0612192	0.0227817	0.0110131	0.0682383
4	18	889.218	0.0289616	0.0454414	0.0319529	0.0324102	0.0203098	0.00388692	0.0352026
4	19	1611.14	0.0602426	0.10045	0.0689935	0.070634	0.0230411	0.013655	0.0797742
4	20	872.414	0.0274968	0.041001	0.0305189	0.0309148	0.0202487	0.00371682	0.0336919
4	21	901.029	0.0290684	0.0437629	0.0324496	0.0328527	0.0213474	0.00416558	0.0359655
4	22	746.666	0.0265812	0.0369116	0.0290746	0.0292973	0.0204623	0.00314291	0.0316625
4	23	918.788	0.0287022	0.0475624	0.0316398	0.0320592	0.0218204	0.00366356	0.0346838
4	24	883.734	0.0285954	0.0428779	0.031509	0.0318456	0.0216831	0.00362018	0.0345006
4	25	897.271	0.0292363	0.053666	0.0322597	0.0326085	0.0209201	0.00379911	0.0353246
4	26	974.107	0.0291905	0.045182	0.0322232	0.0325628	0.0209964	0.00373256	0.0353704
4	27	1577.33	0.0435798	0.201465	0.0625926	0.0569924	0.0230106	0.0245766	0.0765087
4	28	953.961	0.0294499	0.0441138	0.0324587	0.0328069	0.0210422	0.00380242	0.0356374
4	29	900.598	0.0290074	0.0413672	0.0320304	0.0324102	0.0198367	0.00373219	0.0351415
4	30	1600.05	0.0441291	0.181735	0.0633557	0.0581674	0.0230106	0.024092	0.0777752
4	31	2970.6	0.0441749	0.141009	0.0634052	0.0587167	0.0211337	0.023748	0.080827
4	32	898.91	0.0288891	0.0423285	0.031767	0.0321355	0.0216526	0.00365452	0.0348516
4	33	1666.22	0.0438392	0.178958	0.0647228	0.0564431	0.0230259	0.0278512	0.0800946
4	34	1527.76	0.0420996	0.147524	0.0607581	0.0563058	0.0230259	0.0225908	0.0767834
4	35	1727.31	0.042649	0.168338	0.0655401	0.0542458	0.0230564	0.0310292	0.083959
4	36	1609.37	0.0466926	0.148135	0.0650567	0.0622263	0.0230259	0.0216608	0.0815061
4	37	1479.43	0.0488746	0.196506	0.0688844	0.0615854	0.022797	0.0312714	0.0731212
4	38	908.028	0.0294347	0.0487984	0.032637	0.0330663	0.0222934	0.0039388	0.0359503
4	39	1708.23	0.0460365	0.180301	0.0667669	0.0576028	0.0230106	0.0271332	0.0861219
4	40	1609.73	0.0470893	0.168658	0.0639594	0.0593423	0.0230106	0.0220151	0.0786145
4	41	1590.29	0.0504463	0.135195	0.0617206	0.0601358	0.0225681	0.0162332	0.0713054
4	42	777.815	0.0292363	0.0528725	0.0324766	0.0326238	0.0224308	0.00393723	0.0356756
4	43	1584.24	0.0570382	0.112505	0.0676709	0.067422	0.0230106	0.0157611	0.0785077
4	44	1804.4	0.0552529	0.167712	0.0706554	0.066743	0.0224765	0.0230635	0.0789502
4	45	907.803	0.0291905	0.0433661	0.0321505	0.0324865	0.0227054	0.00359549	0.0351568
4	46	968.588	0.0313115	0.0551766	0.0346605	0.0349584	0.0226596	0.00417766	0.0378576
4	47	1701.6	0.0454719	0.187015	0.0662953	0.059205	0.0222019	0.02638	0.0840162
4	48	1714.01	0.0480201	0.189654	0.0634113	0.057969	0.0224002	0.0236673	0.0723735
4	49	933.774	0.0297551	0.0614176	0.0329536	0.0332189	0.0221103	0.00402939	0.0362097
4	50	1827.47	0.0482185	0.185992	0.0699458	0.0621958	0.0230106	0.0292334	0.0826734
4	51	946.548	0.0303502	0.0739757	0.0332122	0.033402	0.0222171	0.00387283	0.0360876
4	52	1611.62	0.0433661	0.180591	0.0618213	0.0546883	0.0230106	0.0246251	0.0769818
4	53	1759.78	0.0580911	0.101808	0.0677935	0.0693523	0.0230259	0.0142331	0.0796063
4	54	1647.18	0.052369	0.0896468	0.0611947	0.0621195	0.0230259	0.0123472	0.0711185
4	55	1795.64	0.0486763	0.159014	0.0702354	0.064683	0.0224155	0.0257717	0.0908064
4	56	1615.99	0.0417487	0.17615	0.0616483	0.0525521	0.0230564	0.0269039	0.0745823
4	57	1889.66	0.0583352	0.162234	0.0713834	0.070985	0.0230259	0.0186748	0.0822766
4	58	1711.91	0.0469978	0.162524	0.0646321	0.0619593	0.0230106	0.0221723	0.0788891
4	59	885.13	0.0287938	0.0409857	0.0318564	0.0323186	0.0213016	0.00374648	0.0350195
4	60	953.431	0.0309606	0.0944228	0.0340681	0.0344091	0.0229191	0.00420054	0.0373465
4	61	1005.54	0.0327153	0.0512551	0.0364221	0.0366064	0.0230106	0.00468848	0.0406348
4	62	882.72	0.0294804	0.0803998	0.032957	0.0330663	0.0230106	0.00424735	0.036347
4	63	680.951	0.0277256	0.0418708	0.0308653	0.0309758	0.0212558	0.00375134	0.0340276
4	64	1925.02	0.0494698	0.190158	0.0730835	0.0636454	0.0230106	0.0307513	0.0930953
4	65	1006.51	0.0317388	0.0522927	0.0350321	0.0353246	0.0230106	0.00420777	0.0383764
4	66	833.737	0.0298314	0.046952	0.0333055	0.0336004	0.0222782	0.0042875	0.0368505
4	67	1598.9	0.0412604	0.166842	0.0600076	0.0514229	0.0230106	0.0262499	0.0733349
4	68	1044.85	0.0324254	0.0505837	0.0360592	0.036286	0.0230106	0.00451168	0.0400549
4	69	854.499	0.0284886	0.0418402	0.0318178	0.0322576	0.0209964	0.00400927	0.0352789
4	70	906.382	0.0293431	0.0545815	0.0322407	0.032517	0.0227817	0.00368834	0.0352636
4	71	942.635	0.0300755	0.0433204	0.0332816	0.0336461	0.022446	0.00396693	0.0366064
4	72	1800.66	0.0494698	0.19794	0.073067	0.0670176	0.0230106	0.0287701	0.0943618
4	73	872.949	0.028336	0.0408637	0.0316297	0.0320287	0.0210727	0.00390788	0.0350042
4	74	1640.29	0.0546731	0.0917678	0.0631098	0.0647746	0.0230106	0.0127202	0.0734112
4	75	1759.89	0.0462654	0.18938	0.0680177	0.0594492	0.0230106	0.0288214	0.0848707
4	76	851.475	0.0284276	0.0436713	0.0321627	0.0324712	0.021622	0.00431006	0.0358587
4	77	1746.22	0.0565194	0.090486	0.0642819	0.0662242	0.0230259	0.0125019	0.0744793
4	78	864.689	0.0287785	0.0418708	0.0318979	0.0323186	0.0198062	0.00372472	0.03505
4	79	1448.47	0.037705	0.135378	0.0564596	0.0489052	0.0214694	0.0238575	0.0718433
4	80	860.355	0.0346227	0.0545663	0.040121	0.0406653	0.0230106	0.00644195	0.0455482
4	81	847.869	0.0288548	0.0428626	0.0322041	0.0326848	0.0216373	0.0040834	0.0356756
4	82	928.368	0.0298772	0.0490425	0.0330368	0.0332341	0.0225528	0.00390972	0.0361944
4	83	1599.66	0.0437629	0.165072	0.0637162	0.0554665	0.0230106	0.0260918	0.0806973
4	84	944.144	0.0302586	0.0500649	0.0333832	0.0336309	0.0230106	0.00385724	0.0365759
4	85	917.787	0.0293278	0.04448	0.0321095	0.0324407	0.0197604	0.00360234	0.035111
4	86	902.992	0.0287785	0.0464332	0.0318033	0.032105	0.0213474	0.00376322	0.0350195
4	87	1694.26	0.0436179	0.195514	0.0640066	0.0548714	0.0230106	0.0295132	0.0733959
4	88	1566	0.0439689	0.196963	0.0635295	0.0576791	0.0230106	0.0255075	0.0768902
4	89	928.594	0.0294804	0.0471656	0.0326498	0.0330968	0.0221103	0.00395755	0.0359503
4	90	1533.03	0.0423133	0.194064	0.0611794	0.0523995	0.0230106	0.0286465	0.0690471
4	91	920.385	0.0298314	0.0464637	0.0330574	0.0333257	0.0220798	0.00389023	0.0363165
4	92	1584.48	0.0446632	0.180041	0.0635343	0.0601358	0.0216068	0.0243764	0.0761425
4	93	871.292	0.0290074	0.0531014	0.0321676	0.0325322	0.0209964	0.00395855	0.0354314
4	94	1630.54	0.0444038	0.178729	0.0634797	0.0583352	0.0230411	0.024215	0.0778515
4	95	1622.53	0.0482795	0.184649	0.0686931	0.0621347	0.0225681	0.0268323	0.085481
4	96	836.792	0.0290684	0.0430915	0.0316943	0.0320439	0.0202029	0.00362088	0.0346532
4	97	1575.61	0.0458991	0.183551	0.0636715	0.0574502	0.0216678	0.0261471	0.0760586
4	98	1585.1	0.0507668	0.142763	0.0634547	0.0619364	0.0230106	0.0175441	0.0741588
4	99	956.59	0.0302129	0.0509346	0.0330851	0.033402	0.0218967	0.00358504	0.0360266
4	100	1683.82	0.0453956	0.17821	0.0645068	0.0560159	0.0215763	0.0271834	0.0762798
4	101	887.087	0.029099	0.0519417	0.0321315	0.0324559	0.021622	0.00375147	0.0352636
4	102	1695.97	0.0470283	0.197772	0.0666052	0.0606546	0.0218204	0.0280821	0.0765087
4	103	731.236	0.0291295	0.0509651	0.0323828	0.0325628	0.0217746	0.00406669	0.0356909
4	104	855.124	0.0300755	0.0455329	0.0335054	0.0339055	0.0222934	0.00432175	0.0370947
4	105	910.254	0.0290074	0.0469215	0.0322328	0.0325933	0.021973	0.00388509	0.0355535
4	106	1628.34	0.0469825	0.161975	0.0645707	0.06215	0.0230106	0.0220537	0.0801099
4	107	1405.43	0.0398871	0.158846	0.0555508	0.0518959	0.0214694	0.0214416	0.0665293
4	108	1591.07	0.0529488	0.0873426	0.060923	0.0623789	0.0230106	0.0125422	0.071397
4	109	1649.66	0.0480201	0.189273	0.063005	0.0605325	0.0213016	0.0221234	0.0742657
4	110	1200.2	0.0349737	0.122072	0.0497346	0.0458228	0.0220493	0.0183744	0.0617227
4	111	868.539	0.0298924	0.0459449	0.0332697	0.0336614	0.0210575	0.00426518	0.0365454
5	1	1421.73	0.0393683	0.142275	0.0564132	0.0529946	0.0218662	0.0205326	0.0700847
5	2	1688.92	0.0475319	0.164797	0.0621633	0.0587015	0.0209354	0.0217951	0.071622
5	3	1688.4	0.0483101	0.150362	0.0638794	0.0607919	0.0230106	0.0205054	0.0773327
5	4	915.313	0.0293278	0.0614481	0.0325746	0.0329442	0.0216526	0.0042637	0.0358434
5	5	1301.33	0.0359808	0.136858	0.052786	0.0461128	0.0217441	0.0218907	0.0665599
5	6	1527.05	0.0423896	0.15938	0.0613395	0.0548562	0.0214084	0.0243702	0.0776875
5	7	1753.32	0.0510872	0.178027	0.0667599	0.0651331	0.0226444	0.0242231	0.0776226
5	8	1611.12	0.0425574	0.161471	0.0620878	0.0557336	0.0214542	0.0251928	0.0788395
5	9	1615.08	0.0528878	0.0885023	0.0608269	0.0624399	0.0230106	0.0116048	0.0699779
5	10	1523.32	0.0534066	0.0917983	0.0617477	0.0637217	0.0230106	0.0121991	0.0718242
5	11	3105.78	0.0508431	0.192584	0.0691357	0.0670176	0.0230106	0.0250197	0.0830243
5	12	1662.71	0.0419623	0.178836	0.0607273	0.0528878	0.0229801	0.0253935	0.0756237
5	13	706.85	0.0263218	0.0369573	0.0287829	0.0290837	0.0203708	0.00307201	0.031281
5	14	1757.24	0.0531014	0.0910964	0.0627407	0.0649424	0.0230411	0.01384	0.0740673
5	15	1512.8	0.0421454	0.18056	0.0618987	0.0585031	0.0221408	0.0247712	0.0767529
5	16	904.228	0.0296025	0.0531472	0.0332266	0.0335546	0.02121	0.00442803	0.0368658
5	17	890.095	0.0298161	0.0472419	0.0327844	0.0332494	0.0211032	0.00380749	0.035935
5	18	1723.42	0.0560044	0.100389	0.0662523	0.0681163	0.0228122	0.0154211	0.0788281
5	19	1664.89	0.0472114	0.191821	0.0688482	0.0602426	0.0223697	0.0325829	0.0785992
5	20	911.523	0.0291447	0.0457923	0.0324975	0.0328985	0.0217136	0.00409688	0.0359045
5	21	1476.21	0.0415274	0.178332	0.0609776	0.0556802	0.0221408	0.0249672	0.0760662
5	22	1651.62	0.0307622	0.050782	0.0342013	0.03505	0.0209964	0.00442355	0.0377356
5	23	1715.32	0.0457008	0.166598	0.0659611	0.0589075	0.0225071	0.0272654	0.0809148
5	24	891.123	0.0291752	0.0475624	0.0323903	0.0327916	0.0216983	0.00408843	0.0357977
5	25	1599.98	0.0452583	0.170611	0.0631181	0.0596933	0.0222782	0.0236066	0.0778782
5	26	1643.24	0.0439307	0.169192	0.0607886	0.0574197	0.0217441	0.0218603	0.0753796
5	27	1595.67	0.0464942	0.175036	0.0657736	0.0610361	0.0229801	0.0252293	0.0800946
5	28	834.211	0.0289921	0.0462654	0.0317819	0.0322728	0.0205692	0.00361587	0.0347448
5	29	1587.16	0.0433661	0.203067	0.062858	0.0521096	0.0230106	0.0341403	0.0651255
5	30	846.376	0.029221	0.0528878	0.0325755	0.0329137	0.0211643	0.00411537	0.0359808
5	31	907.273	0.0292058	0.0427863	0.0325199	0.0329137	0.0221561	0.00402955	0.0358892
5	32	883.377	0.0289158	0.0520485	0.0321462	0.0325017	0.0207218	0.0040999	0.0354467
5	33	864.254	0.0286259	0.0482185	0.0319361	0.0324559	0.0208896	0.00408802	0.0354162
5	34	1728.86	0.0595712	0.139269	0.073353	0.0724498	0.0230106	0.0198305	0.0860304
5	35	928.431	0.0296941	0.0508431	0.0334305	0.0336461	0.0214084	0.00453957	0.0371557
5	36	1564.52	0.0409819	0.182925	0.0619783	0.0545052	0.0221561	0.0281494	0.0758259
5	37	1733.29	0.0443885	0.18555	0.067281	0.0584115	0.0230106	0.0291738	0.0863966
5	38	1661.75	0.0412146	0.145678	0.0598592	0.0558633	0.0230106	0.0221824	0.0774548
5	39	919.971	0.0282292	0.0533913	0.0317286	0.0320439	0.0209964	0.00410752	0.0351568
5	40	978.737	0.0305791	0.0446784	0.0342863	0.034638	0.0221714	0.00453273	0.0379644
5	41	859.494	0.0291142	0.0677806	0.0323252	0.0326085	0.0210575	0.00425961	0.0355688
5	42	1607.01	0.0451667	0.133974	0.0635457	0.0579461	0.0230259	0.0225627	0.0813764
5	43	991.425	0.0310216	0.0510719	0.0349943	0.0351873	0.0212558	0.00491458	0.0389296
5	44	926.756	0.0300755	0.0475929	0.0337456	0.0340581	0.0225071	0.00445777	0.0374304
5	45	869.017	0.0287633	0.0413519	0.0320836	0.0325628	0.0212711	0.00398632	0.035523
5	46	847.805	0.0285649	0.041474	0.0318652	0.0323491	0.020737	0.00399427	0.0352789
5	47	982.446	0.0319219	0.0477913	0.036065	0.0363165	0.0228885	0.00496902	0.0404364
5	48	902.141	0.0310063	0.0592966	0.0344631	0.0345769	0.0223545	0.00451147	0.0377966
5	49	918.077	0.0292058	0.0431525	0.0325513	0.0331273	0.0221103	0.00404522	0.035935
5	50	991.871	0.0319066	0.0483558	0.0356916	0.0357977	0.0230106	0.00471269	0.0397498
5	51	1525.67	0.0429541	0.175204	0.0604224	0.0577401	0.0230259	0.0220774	0.07393
5	52	1637.36	0.0575875	0.0979019	0.0667767	0.0678416	0.0230259	0.013734	0.0776379
5	53	967.944	0.0310979	0.0488746	0.0350349	0.0353399	0.0227207	0.00473768	0.03888
5	54	892.801	0.0282597	0.0408942	0.031377	0.0318761	0.0215152	0.00381409	0.0346075
5	55	966.467	0.0315709	0.0486305	0.0356617	0.03579	0.0225986	0.00509537	0.0402075
5	56	1847.18	0.0512398	0.185122	0.0756019	0.0719921	0.0230411	0.0284579	0.0959602
5	57	917.921	0.0279698	0.0413367	0.0314626	0.0318456	0.0204929	0.00405304	0.0349889
5	58	1756.84	0.0488899	0.206348	0.0702314	0.0661936	0.0230411	0.0258168	0.0876631
5	59	838.489	0.0285496	0.0447852	0.0318188	0.032105	0.0218662	0.00396969	0.0351415
5	60	938.534	0.0303502	0.0482185	0.0340098	0.0343786	0.0214847	0.00449802	0.0376745
5	61	1961.88	0.0507057	0.23476	0.0745705	0.0711833	0.0230411	0.0286395	0.0929541
5	62	1622.64	0.0434882	0.172625	0.0598958	0.0536355	0.022385	0.0246552	0.0691234
5	63	885.732	0.0305638	0.052903	0.0335314	0.0337911	0.0205234	0.00410725	0.0367437
5	64	1883.65	0.0509194	0.156024	0.0734967	0.0716259	0.0230259	0.0257926	0.09337
5	65	1015.88	0.0311894	0.0471656	0.0348156	0.03505	0.0229496	0.00447672	0.0383917
5	66	1907.6	0.0519722	0.232044	0.0748843	0.0665293	0.0230259	0.0340223	0.0851301
5	67	897.194	0.0296635	0.0463417	0.0332392	0.0336767	0.0214847	0.00439159	0.0368811
5	68	1619.98	0.0457923	0.165072	0.0637662	0.0598917	0.0220951	0.0225619	0.0792096
5	69	3278.02	0.0488441	0.168643	0.0702819	0.0631571	0.0225071	0.0267935	0.0919661
5	70	1806.78	0.0489204	0.155367	0.0685477	0.0624704	0.0230106	0.0247341	0.0865187
5	71	1534.64	0.043473	0.158434	0.0584804	0.052369	0.0205539	0.024393	0.0673533
5	72	1003.47	0.0326848	0.0521706	0.0364407	0.0366369	0.0225528	0.00476834	0.0406806
5	73	1590.7	0.042359	0.146914	0.0617364	0.0548867	0.0230106	0.0236043	0.0817884
5	74	1772.29	0.0611582	0.110079	0.0703792	0.0722667	0.0230259	0.0141082	0.0811627
5	75	1691.9	0.0453651	0.180652	0.0667389	0.057023	0.0230106	0.0293648	0.0848402
5	76	837.463	0.0289921	0.0427253	0.0323782	0.0327306	0.021912	0.00412258	0.0358434
5	77	1866.33	0.0557565	0.165011	0.0710225	0.0683299	0.0230259	0.0227069	0.0809491
5	78	881.246	0.0292058	0.0509499	0.0323002	0.0327916	0.0215152	0.0038488	0.035523
5	79	1626.03	0.0439879	0.196948	0.0616225	0.0546883	0.0230106	0.0279562	0.0684062
5	80	939.311	0.0305333	0.0581064	0.0336261	0.0340429	0.0224613	0.00401228	0.0368658
5	81	785.995	0.0275731	0.0404212	0.030763	0.0311284	0.0202029	0.00388211	0.0340124
5	82	889.439	0.0302892	0.0555123	0.0333761	0.0338598	0.021561	0.00415857	0.0366217
5	83	1778.38	0.0499275	0.207706	0.0671748	0.0624399	0.0230564	0.0240733	0.0812009
5	84	1733.34	0.0576486	0.0943465	0.0673561	0.0692454	0.0230411	0.0138704	0.0786984
5	85	1693.41	0.0587167	0.10251	0.0690482	0.0711376	0.0230106	0.0153452	0.0813153
5	86	1636.12	0.0501564	0.182467	0.0698541	0.0664683	0.0230259	0.0249745	0.0872206
5	87	858.064	0.0289311	0.057557	0.0321384	0.0324712	0.0213169	0.00409623	0.0354925
5	88	1630.82	0.0538796	0.0954147	0.063397	0.0652018	0.0230106	0.0143174	0.0750591
5	89	874.017	0.0288548	0.0425727	0.0320001	0.0324102	0.0213321	0.00382374	0.0352636
5	90	657.304	0.0258335	0.0361181	0.0282918	0.0285191	0.019089	0.00296977	0.0307584
5	91	945.46	0.0299229	0.0494698	0.0330951	0.033341	0.0220645	0.00406149	0.0364843
5	92	785.328	0.0272679	0.0526894	0.0303696	0.0306706	0.0199435	0.00379997	0.0335699
5	93	930.056	0.0305943	0.0514382	0.033358	0.0337377	0.0219883	0.00380612	0.0364843
5	94	903.752	0.0294881	0.0498512	0.0329957	0.0334936	0.020737	0.00438146	0.0366522
5	95	1529.56	0.0489052	0.168002	0.0618904	0.0591592	0.0230869	0.0201597	0.0725719
5	96	910.535	0.0291447	0.0422522	0.032568	0.03299	0.0218051	0.0041051	0.0360571
5	97	1589.38	0.0423896	0.153292	0.0613755	0.0546426	0.0230106	0.024317	0.0769207
5	98	1656.18	0.0443008	0.152193	0.0622228	0.0608072	0.0214237	0.0222662	0.0777447
5	99	1058.67	0.0257267	0.043183	0.0304758	0.0302281	0.0199435	0.00503733	0.0350652
5	100	610.9	0.0254368	0.0348211	0.0277392	0.0279622	0.019501	0.00273551	0.0299992
5	101	1622.11	0.0431373	0.211948	0.0630363	0.0536355	0.0230106	0.0284171	0.0769818
5	102	711.889	0.0269017	0.0434424	0.0298824	0.0301823	0.0204623	0.00363888	0.03299
5	103	841.263	0.029221	0.0488594	0.0325277	0.0328756	0.0209354	0.00419693	0.0360571
5	104	913.899	0.0293431	0.0437018	0.0326241	0.0331655	0.0211948	0.00405658	0.0360723
5	105	873.504	0.030045	0.047364	0.0336805	0.0340429	0.0207218	0.00449718	0.0373541
6	1	1605.2	0.0426337	0.177127	0.0638659	0.0556649	0.0225681	0.0270223	0.0807889
6	2	931.922	0.0296941	0.0459754	0.0327565	0.0332799	0.0215152	0.00384509	0.0359655
6	3	1621.58	0.0521401	0.0869306	0.060275	0.0607767	0.0230106	0.0121178	0.0702983
6	4	1694.39	0.0450294	0.193835	0.0663324	0.0599374	0.0227817	0.0270701	0.0822919
6	5	1548.14	0.0428626	0.171771	0.0602882	0.0548104	0.0222477	0.0226162	0.0756886
6	6	1702.04	0.0518807	0.134966	0.0601003	0.0623178	0.0219577	0.0135544	0.0711376
6	7	1310.06	0.034638	0.145556	0.050217	0.0464485	0.0208591	0.0191023	0.0620432
6	8	788.516	0.0271763	0.0385901	0.0296724	0.0297856	0.0194553	0.00331259	0.0323033
6	9	820.978	0.028275	0.0472725	0.0314744	0.0319371	0.0209812	0.00394768	0.0347906
6	10	1690.95	0.0441596	0.185229	0.0641482	0.0570993	0.0230259	0.026862	0.0782635
6	11	1653.8	0.045304	0.145998	0.0640785	0.0617685	0.0230259	0.0224065	0.0804303
6	12	1564.68	0.0442512	0.134905	0.0622958	0.0580453	0.022858	0.0221812	0.0782902
6	13	955.479	0.0304723	0.059266	0.033555	0.0339513	0.0230259	0.0039739	0.0366369
6	14	1594.96	0.0521325	0.0832685	0.0599653	0.0617685	0.0230106	0.0110783	0.0690776
6	15	1574.81	0.0532235	0.116304	0.062995	0.063859	0.0230259	0.0134668	0.0737011
6	16	1596.7	0.0420958	0.175341	0.0631432	0.0582132	0.0230259	0.0253165	0.0804913
6	17	1495.26	0.0371862	0.14168	0.0571123	0.0511177	0.0225528	0.0231984	0.0742351
6	18	866.252	0.0287785	0.043595	0.0320336	0.0325322	0.0212253	0.00407453	0.0354772
6	19	912.582	0.0291142	0.0437324	0.0321513	0.0326543	0.0202335	0.00381428	0.0353552
6	20	911.119	0.0297093	0.0605325	0.0325842	0.0329137	0.0218357	0.00381283	0.035462
6	21	1794.15	0.0631876	0.107637	0.0737364	0.0765393	0.0230106	0.0157596	0.0862287
6	22	1778.38	0.047364	0.171603	0.0683755	0.0607614	0.0227207	0.0258811	0.0879988
6	23	919.971	0.030457	0.057847	0.0336001	0.0339208	0.0226902	0.0039558	0.0366979
6	24	1579.74	0.0423896	0.175204	0.0618899	0.0548867	0.0231174	0.0258336	0.0742657
6	25	898.793	0.0292821	0.0499123	0.0326525	0.0331273	0.0213931	0.00415852	0.0361334
6	26	1710.04	0.0429389	0.189349	0.0646664	0.0552071	0.0230106	0.02901	0.0811322
6	27	1440.77	0.0379492	0.125933	0.0548218	0.0519875	0.0213169	0.0196127	0.0700999
6	28	1594.88	0.0433509	0.17554	0.0607712	0.0556191	0.0223697	0.0239996	0.0733501
6	29	1567.63	0.0420539	0.172824	0.0622867	0.0560159	0.0230106	0.0250893	0.0789654
6	30	925.793	0.0296788	0.0497139	0.0327055	0.0330587	0.0224918	0.00382123	0.035874
6	31	1781.88	0.0609598	0.124773	0.0718732	0.072694	0.0230259	0.016205	0.0842603
6	32	1688.49	0.0465858	0.183719	0.0650118	0.0578775	0.0230564	0.0247097	0.0772259
6	33	1722.23	0.0563058	0.114977	0.0662678	0.0666361	0.0219425	0.0145163	0.0771191
6	34	968.477	0.0305943	0.0482032	0.0338451	0.0343023	0.0224308	0.00395663	0.0370947
6	35	900.328	0.0293736	0.042359	0.0325369	0.032929	0.0213626	0.00388192	0.0358282
6	36	1558.67	0.0402228	0.164309	0.0603481	0.052842	0.0223697	0.0258805	0.0776379
6	37	897.488	0.029099	0.0426337	0.0324401	0.0329595	0.0211795	0.00410726	0.0359197
6	38	845.955	0.028275	0.0423896	0.0312818	0.0317693	0.0204929	0.00377713	0.0344701
6	39	891.021	0.029633	0.0650645	0.0329788	0.0333562	0.0206455	0.00422023	0.0363622
6	40	880.682	0.0294194	0.0494698	0.0324209	0.0327153	0.0222019	0.00367995	0.0355077
6	41	1745.03	0.045552	0.177905	0.0673316	0.0593194	0.0230564	0.0264164	0.0869154
6	42	1800.57	0.0615396	0.110338	0.0730987	0.0741741	0.0221866	0.0152747	0.0860151
6	43	1810.14	0.0528115	0.14197	0.0686362	0.0643168	0.0230106	0.0205448	0.0829633
6	44	964.52	0.0341497	0.052842	0.0385715	0.0386969	0.0230106	0.0053144	0.043183
6	45	943.078	0.0298314	0.0452125	0.0330661	0.0334783	0.0228428	0.00393707	0.0363622
6	46	1616.09	0.04271	0.158679	0.0618458	0.05729	0.0215763	0.0232894	0.0792554
6	47	817.119	0.0285496	0.0420386	0.0317192	0.0321202	0.0209049	0.00389248	0.0350042
6	48	825.989	0.0284123	0.053727	0.0315191	0.0318303	0.0197604	0.00395844	0.0346227
6	49	1692.55	0.0679026	0.123461	0.0814429	0.0840925	0.0230259	0.0199685	0.0971237
6	50	1745.8	0.0477913	0.179294	0.0676535	0.0609751	0.0228275	0.0255479	0.0838941
6	51	1838.41	0.0508431	0.17998	0.0710579	0.066331	0.0230259	0.0246778	0.0893721
6	52	1827.09	0.062501	0.102022	0.0715159	0.0730144	0.0230411	0.0133619	0.0820935
6	53	1919.03	0.0607309	0.09897	0.069707	0.0714122	0.0230259	0.013388	0.0807965
6	54	952.198	0.0313268	0.0597238	0.0346481	0.0348821	0.0230106	0.00414715	0.0378119
6	55	908.019	0.0300145	0.0467994	0.0334581	0.033814	0.0226596	0.00413603	0.0368811
6	56	1686.64	0.0492409	0.14313	0.0622514	0.0603647	0.0220645	0.0183664	0.0743267
6	57	881.822	0.0286717	0.0426795	0.0323284	0.0327459	0.0207523	0.00435131	0.0360113
6	58	1623.37	0.0541695	0.0894026	0.0626131	0.0639887	0.0230106	0.0118601	0.0720073
6	59	1028.42	0.0305791	0.0666819	0.0339235	0.0341802	0.0230259	0.00422053	0.0370336
6	60	981.275	0.0320592	0.117205	0.0356853	0.0357061	0.0230716	0.00497142	0.0390631
6	61	1835.39	0.0513428	0.159121	0.0728474	0.0673228	0.0230106	0.025314	0.0930037
6	62	1903.81	0.0624857	0.10605	0.0718662	0.0733501	0.0230411	0.0140609	0.0834058
6	63	1780.08	0.0600137	0.0981155	0.0686867	0.0706188	0.0230411	0.0128016	0.0789654
6	64	1728.96	0.0483406	0.144183	0.0655553	0.0641489	0.0228428	0.0204014	0.081239
6	65	927.351	0.0301976	0.0561685	0.0334953	0.0338293	0.0222782	0.00402674	0.0367285
6	66	2958.38	0.0477455	0.176593	0.0646965	0.0617838	0.0230106	0.0233959	0.0756237
6	67	1657.66	0.0437934	0.195926	0.0647344	0.0587396	0.022385	0.0261257	0.0827955
6	68	1586.4	0.055375	0.0983139	0.0641254	0.0647135	0.0231022	0.0122157	0.074052
6	69	1733.08	0.0468605	0.185077	0.0666211	0.062562	0.0230259	0.024415	0.0825513
6	70	1832.08	0.0525216	0.181262	0.070573	0.0705882	0.022034	0.0233758	0.0829175
6	71	1875.69	0.0513771	0.162707	0.0720559	0.0686275	0.0230106	0.0237867	0.093286
6	72	1044.56	0.033402	0.0563363	0.037255	0.0373693	0.0230106	0.00476732	0.041474
6	73	1857.17	0.0474556	0.204211	0.0692688	0.0591745	0.0230106	0.0316323	0.0813001
6	74	1652.63	0.054345	0.105653	0.064028	0.0650187	0.0230259	0.013408	0.0741588
6	75	940.154	0.0309606	0.0502022	0.0346154	0.0350042	0.0230106	0.004421	0.0381323
6	76	865.07	0.0291905	0.0471656	0.0325655	0.03299	0.0218967	0.00406641	0.0360113
6	77	1668	0.0557107	0.0940719	0.0650776	0.0663462	0.0230259	0.0130293	0.0757305
6	78	709.323	0.0323796	0.0505989	0.0371451	0.037171	0.0217746	0.0061021	0.0423438
6	79	1573.66	0.0453002	0.162661	0.0639204	0.0607614	0.0230106	0.0227262	0.0784314
6	80	1002.73	0.0315709	0.0448615	0.0347942	0.0352331	0.0230259	0.00414284	0.0380865
6	81	1816.45	0.0499123	0.219257	0.0727862	0.0623941	0.0230106	0.0335281	0.0834516
6	82	981.025	0.0333257	0.0575265	0.0371783	0.0372168	0.0230716	0.00468138	0.0412757
6	83	1023.36	0.0335393	0.0646372	0.0377709	0.037995	0.0230411	0.00498807	0.0421912
6	84	1663.95	0.046067	0.185138	0.0643246	0.0580453	0.0230411	0.0246721	0.0760967
6	85	1578.63	0.0439765	0.182269	0.0636748	0.0559854	0.0226902	0.0243606	0.0815137
6	86	1644.14	0.0550698	0.113848	0.0634853	0.0648966	0.0230106	0.0124169	0.0739376
6	87	1531.93	0.0428626	0.157107	0.0601796	0.0560006	0.0214847	0.0226352	0.072694
6	88	881.956	0.028809	0.0505226	0.0320478	0.0324254	0.0209354	0.0039131	0.0353552
6	89	886.734	0.0293126	0.0519112	0.0327172	0.0331731	0.0207218	0.00412725	0.0362097
6	90	872.685	0.0294957	0.0436255	0.0327954	0.0332036	0.0228733	0.00403804	0.0362249
6	91	1651.83	0.0532692	0.143725	0.0653052	0.064622	0.0225681	0.0178081	0.0742809
6	92	1843.27	0.0583047	0.142275	0.0702464	0.0703746	0.0225986	0.016861	0.0810559
6	93	1721.86	0.0473945	0.212985	0.0695868	0.058793	0.0229801	0.0319423	0.0829328
6	94	994.245	0.0316472	0.045182	0.0350704	0.0353246	0.0230259	0.00423087	0.0384375
6	95	1567.94	0.0507477	0.151553	0.0641466	0.0612802	0.0230259	0.0181845	0.0742962
6	96	1639.57	0.0552377	0.120592	0.0646009	0.0662089	0.0230106	0.0128838	0.0750744
6	97	1585.29	0.0449302	0.1608	0.0633861	0.0563363	0.0230106	0.024366	0.0800946
6	98	649.738	0.0261387	0.0358434	0.0285185	0.0287938	0.0200504	0.00292204	0.0309606
6	99	781.456	0.0272984	0.038819	0.0303537	0.0307317	0.0205692	0.00364018	0.0334478
6	100	853.922	0.0285344	0.0415045	0.0319498	0.0323339	0.0202182	0.00403377	0.0354009
6	101	918.21	0.0297246	0.0428626	0.0329225	0.0333867	0.0226444	0.00395929	0.0363012
6	102	952.82	0.0311589	0.0456092	0.0344551	0.0348669	0.0230106	0.00413909	0.0377813
6	103	1681.93	0.0453651	0.209903	0.0656901	0.057969	0.0230106	0.0267461	0.0811627
6	104	915.392	0.0307622	0.049012	0.0340712	0.0343938	0.0230259	0.00396693	0.0373388
6	105	956.905	0.0305333	0.0437324	0.0337568	0.034226	0.0203403	0.00398269	0.0370794
6	106	1707.5	0.0446098	0.185748	0.0665693	0.0581216	0.0230106	0.0266197	0.0865187
6	107	942.032	0.0297551	0.0479438	0.0330086	0.0334478	0.0216678	0.00398572	0.0363317
6	108	623.867	0.0257267	0.0433051	0.0284325	0.0286412	0.0195468	0.00316371	0.0310674
6	109	1578.34	0.0440528	0.23241	0.0633616	0.0574044	0.0230106	0.0268958	0.0741436
6	110	766.532	0.0272221	0.0387274	0.0299883	0.0306401	0.020737	0.00338771	0.0327764
6	111	1620.26	0.0431373	0.164675	0.0623754	0.0569924	0.0230106	0.0244853	0.0787518
6	112	882.565	0.0295262	0.0443427	0.0327981	0.0332341	0.0218204	0.00407077	0.0362402
6	113	924.073	0.0303044	0.0449531	0.0337167	0.0342412	0.0230106	0.00416174	0.0372168
6	114	1762.89	0.0518959	0.194247	0.068507	0.0644083	0.0230106	0.023232	0.0812085
6	115	1662.95	0.0449683	0.200992	0.065654	0.0578012	0.0230716	0.0276421	0.0814221
6	116	888.64	0.0291752	0.0416266	0.032438	0.0329442	0.0213474	0.0039533	0.0358129
6	117	928.266	0.0295567	0.0437324	0.0330709	0.0336156	0.0212558	0.00421473	0.0367132
6	118	1524.38	0.0441749	0.14876	0.0611538	0.0570993	0.0227054	0.0208388	0.0771649
6	119	1373.65	0.0343938	0.150607	0.0515171	0.0439155	0.0215457	0.0230892	0.0654154
6	120	700.934	0.0267643	0.0376593	0.0294176	0.0297322	0.0189059	0.00327482	0.0321355
7	1	1753.75	0.0547303	0.0946975	0.064956	0.0672465	0.0223545	0.0152482	0.0771191
7	2	646.517	0.0261997	0.0370489	0.0286399	0.0288548	0.0205844	0.00304007	0.0310979
7	3	1706.91	0.0498817	0.164706	0.0674133	0.0611734	0.0230106	0.0248499	0.0823987
7	4	1702.14	0.053193	0.124559	0.0647522	0.0645457	0.0225071	0.0168485	0.0765393
7	5	895.626	0.0293278	0.0489815	0.032754	0.0331273	0.0213016	0.00431387	0.0361944
7	6	886.033	0.029633	0.0455634	0.0332047	0.0336156	0.0210575	0.00447445	0.0368505
7	7	848.762	0.0295872	0.0445411	0.0330772	0.0333257	0.0209201	0.00455605	0.0366674
7	8	1632.26	0.0539406	0.0937057	0.0626806	0.0641337	0.022858	0.0139178	0.07364
7	9	1769.73	0.0550546	0.138582	0.0660224	0.0669871	0.0228122	0.0170995	0.0778058
7	10	786.678	0.0276951	0.0410468	0.0309972	0.0313573	0.0211337	0.00405493	0.0344244
7	11	1600.44	0.0499504	0.181033	0.0658778	0.0621195	0.0226444	0.0234289	0.0770733
7	12	1732.61	0.0457618	0.177005	0.0663377	0.0592355	0.0230259	0.0274689	0.0858091
7	13	1685.52	0.0454414	0.17348	0.0653987	0.0595254	0.0230106	0.0255587	0.0825055
7	14	740.969	0.0272221	0.0419471	0.0304237	0.0306859	0.0202182	0.00392466	0.0336767
7	15	1649.6	0.0504921	0.181445	0.0644427	0.0630198	0.0226139	0.0202272	0.0769818
7	16	1639.33	0.055024	0.0928511	0.064424	0.0674754	0.0230106	0.0147242	0.0759136
7	17	860.134	0.0294957	0.0468147	0.0329642	0.0331273	0.0203555	0.00445882	0.0364538
7	18	884.72	0.0291447	0.050782	0.0326008	0.0329747	0.0208286	0.00429404	0.0361028
7	19	1637.03	0.0551766	0.143282	0.0653533	0.0670939	0.021973	0.0177269	0.0773022
7	20	1599.36	0.0310216	0.0517281	0.0348437	0.0355077	0.0222324	0.00487161	0.0386206
7	21	3301.36	0.0561074	0.233463	0.0729825	0.0691081	0.0229038	0.0300671	0.0790723
7	22	1610.77	0.0452888	0.230426	0.0632071	0.0564584	0.0226444	0.0269725	0.0751659
7	23	884.752	0.0289616	0.0424506	0.0321611	0.0324865	0.0207523	0.00403617	0.0355077
7	24	825.34	0.0280156	0.041413	0.0311684	0.0315404	0.0187228	0.00397819	0.0344396
7	25	860.39	0.0290532	0.0435798	0.0327256	0.0330053	0.0208133	0.00448247	0.036408
7	26	838.087	0.0289769	0.0508431	0.0324588	0.0328222	0.0211032	0.00430399	0.035996
7	27	841.183	0.0289616	0.0436713	0.0326927	0.0329747	0.0213321	0.0045016	0.0363775
7	28	845.56	0.0300908	0.0691081	0.0336809	0.0339818	0.0218357	0.0045979	0.0372625
7	29	930.363	0.0296025	0.0680705	0.0332142	0.0333257	0.0216983	0.00456696	0.0366217
7	30	1706.96	0.0447395	0.178256	0.0633147	0.0601358	0.0228122	0.0238331	0.0791943
7	31	1651.49	0.0446174	0.182574	0.0627918	0.0582742	0.0230106	0.0254624	0.0740673
7	32	717.864	0.0274968	0.0415808	0.0309705	0.0312657	0.0170748	0.00423235	0.0345159
7	33	1586.01	0.0517281	0.149142	0.0651926	0.0651408	0.0229496	0.0192563	0.0768902
7	34	867.308	0.0290227	0.0593271	0.0325359	0.0328832	0.0209812	0.00433318	0.0360723
7	35	932.956	0.0294957	0.0449683	0.0333306	0.0335927	0.0215152	0.00464863	0.0371252
7	36	1626.95	0.0456397	0.16878	0.0628383	0.057969	0.0221103	0.0244656	0.0752117
7	37	1662.6	0.0476539	0.18204	0.0677781	0.0612497	0.0221561	0.026994	0.0841535
7	38	1680.57	0.0533303	0.0961013	0.0633364	0.0652628	0.0213321	0.0150159	0.0754406
7	39	963.086	0.0307317	0.0639353	0.0346085	0.0349126	0.0224002	0.00480882	0.0383764
7	40	1747.25	0.0635691	0.105547	0.0727749	0.0745861	0.0230259	0.0148922	0.0840925
7	41	872.446	0.0292668	0.0602274	0.0324161	0.0327764	0.0211948	0.00417293	0.0355077
7	42	1747.1	0.0481117	0.177234	0.0671366	0.0640879	0.0230106	0.0246544	0.0820668
7	43	908.405	0.0289616	0.0435645	0.0324002	0.0328374	0.0216373	0.00417615	0.0358892
7	44	1562.78	0.0443122	0.156909	0.061406	0.0616312	0.020798	0.0210159	0.0755627
7	45	945.185	0.0299382	0.0866102	0.0337205	0.0340124	0.0207675	0.00473351	0.0373388
7	46	1730.45	0.0457008	0.160647	0.0643793	0.0620127	0.0220035	0.0237206	0.0796368
7	47	1679.99	0.0509651	0.219562	0.0696454	0.0649271	0.0230106	0.0262859	0.0819867
7	48	1655.53	0.0555581	0.0940719	0.0645127	0.0662089	0.0230106	0.0139873	0.0758068
7	49	1691.76	0.0488746	0.173999	0.0666836	0.0615396	0.0230716	0.0257254	0.0787671
7	50	1598.19	0.0448005	0.188983	0.0637719	0.0592203	0.0230106	0.0241519	0.0799878
7	51	930.096	0.0299382	0.0493477	0.0334772	0.0337377	0.0224613	0.0044211	0.0369573
7	52	824.4	0.0288396	0.0440681	0.0324184	0.0326696	0.0211185	0.00444009	0.0360113
7	53	2211.43	0.0513771	0.226413	0.0686885	0.0618906	0.0230259	0.0287164	0.0769207
7	54	892.378	0.0288853	0.0429541	0.0323736	0.0328527	0.021561	0.00423018	0.0358892
7	55	1670.96	0.0666056	0.107195	0.0755064	0.07776	0.0230106	0.0151836	0.087129
7	56	908.576	0.0289006	0.0863813	0.0322888	0.0325475	0.0208438	0.0044161	0.0355383
7	57	1674.8	0.0506752	0.18793	0.0646742	0.0655528	0.0230106	0.0185817	0.0760967
7	58	1743.61	0.050309	0.168826	0.0694858	0.0686198	0.0230259	0.0241298	0.0834363
7	59	3544.27	0.059617	0.207355	0.0822585	0.0766918	0.0230106	0.0308835	0.0996872
7	60	1615.56	0.0576944	0.170413	0.0718508	0.0734722	0.0230106	0.0199898	0.0832341
7	61	976.527	0.03299	0.0560464	0.0372194	0.0372473	0.0230259	0.00534487	0.0418402
7	62	962.29	0.0332189	0.051194	0.0373198	0.0373541	0.0230411	0.00530555	0.0417792
7	63	1662.33	0.0447395	0.183688	0.0635349	0.0613107	0.0230106	0.0232937	0.0782635
7	64	1632.31	0.0443122	0.158419	0.0632165	0.0578851	0.0230106	0.0247307	0.0768444
7	65	1649.44	0.0468147	0.166064	0.0651076	0.0588693	0.0230106	0.0263152	0.0747463
7	66	923.505	0.0301976	0.0528115	0.0339761	0.034226	0.0230106	0.00457956	0.0376287
7	67	993.923	0.0320287	0.0584268	0.0361953	0.0362707	0.0218967	0.00527355	0.0406653
7	68	1921.94	0.0542458	0.162737	0.0701669	0.0683604	0.0230106	0.0236711	0.0823987
7	69	936.643	0.028687	0.045243	0.0326425	0.0330205	0.0214694	0.00466917	0.0365148
7	70	1778.75	0.0582589	0.102541	0.0684003	0.069688	0.0230106	0.014488	0.0802777
7	71	936.585	0.0304265	0.0466163	0.0337739	0.0339208	0.0226444	0.00413943	0.0371252
7	72	901.913	0.0288853	0.0447852	0.0326413	0.0329442	0.0217288	0.00448887	0.0363622
7	73	918.648	0.0292973	0.0517891	0.0328065	0.0332036	0.0214847	0.00425179	0.0363317
7	74	793.141	0.0271305	0.0392615	0.0298117	0.0300145	0.0200809	0.00340152	0.0326238
7	75	907.919	0.0296788	0.0752728	0.0330657	0.0333562	0.0209659	0.00440894	0.0365606
7	76	901.768	0.0290532	0.0417639	0.0320196	0.0321355	0.0215305	0.00370798	0.0350347
7	77	934.675	0.0294347	0.0504921	0.0332909	0.0335393	0.0209049	0.00464125	0.0371252
7	78	929.505	0.0301976	0.045182	0.0339272	0.0344244	0.0222324	0.00463827	0.0377661
7	79	911.289	0.0298314	0.0633555	0.0334971	0.0336995	0.0226291	0.00446887	0.0370947
7	80	1747.19	0.0478523	0.251987	0.0699101	0.0601968	0.0214542	0.0331499	0.080354
7	81	867.417	0.0288701	0.0480201	0.0321838	0.0324865	0.0216831	0.00397588	0.0354925
7	82	1641.59	0.0453651	0.145296	0.0633794	0.0598154	0.0230259	0.0225401	0.0788586
7	83	1561.9	0.0475166	0.19472	0.0646829	0.0602274	0.022858	0.0236671	0.0762036
7	84	777.241	0.0271153	0.0436255	0.0294175	0.0295872	0.0212711	0.00297623	0.0317693
7	85	1669.87	0.0501984	0.167163	0.0665632	0.0656748	0.0230411	0.0218747	0.0786679
7	86	955.753	0.0296025	0.0444038	0.0332309	0.0336461	0.0200809	0.00446737	0.0368658
7	87	1509.39	0.0471656	0.140658	0.0609855	0.058732	0.0230259	0.0187936	0.0717556
7	88	1647.42	0.0501488	0.180453	0.0656082	0.0631418	0.0230106	0.0212781	0.0777295
7	89	1618.41	0.0506752	0.15346	0.0644194	0.0639658	0.0230106	0.0186138	0.0765698
7	90	897.602	0.030045	0.0478676	0.0336004	0.0341955	0.0210575	0.00454422	0.037171
7	91	1681.76	0.0453651	0.15787	0.0659645	0.0596933	0.0230106	0.0262124	0.0803273
7	92	1580.5	0.0467079	0.185779	0.063843	0.0571145	0.0230564	0.0250207	0.0733043
7	93	788.888	0.0272679	0.0404974	0.0299604	0.0301671	0.0211643	0.00338211	0.0327764
7	94	1554.14	0.0448768	0.145342	0.0602265	0.0573587	0.0230259	0.0198028	0.0733349
7	95	1573.71	0.0549325	0.095613	0.0639226	0.0648051	0.0230106	0.0125696	0.0739452
7	96	907.084	0.0296635	0.0440681	0.0332253	0.0334325	0.0213169	0.00437679	0.0368048
7	97	1696.47	0.0510109	0.197635	0.0654526	0.0652018	0.0230259	0.0200749	0.0766918
7	98	1590.82	0.0441138	0.155276	0.060809	0.0572824	0.0220951	0.0213359	0.0769207
7	99	1715.71	0.0482948	0.161944	0.0647073	0.0635386	0.0220035	0.0210095	0.0788434
7	100	1765.35	0.0478218	0.15639	0.0668872	0.0628061	0.0230259	0.0239817	0.0831121
8	1	551.968	0.0253605	0.033341	0.0271344	0.0273136	0.0200809	0.00227273	0.0289616
8	2	1637.61	0.0433814	0.182757	0.0623968	0.0579385	0.0218204	0.0247783	0.0757305
8	3	1624.33	0.0462501	0.179751	0.0624814	0.0598917	0.0220798	0.0227033	0.0731975
8	4	854.538	0.0298772	0.0458381	0.0338485	0.0342565	0.0214847	0.00489563	0.0378424
8	5	821.524	0.0289616	0.0404822	0.0319175	0.032517	0.0208133	0.00386306	0.0351263
8	6	1309.5	0.046891	0.0763561	0.0530916	0.0553902	0.0217288	0.0100734	0.0607462
8	7	1603.23	0.0473182	0.17966	0.0628889	0.0574197	0.0230106	0.0227996	0.0745708
8	8	837.904	0.0287175	0.0423133	0.0317424	0.0322881	0.0211032	0.00376058	0.0349126
8	9	1588.52	0.030869	0.0458839	0.0348796	0.0359655	0.0211643	0.00507812	0.0391241
8	10	1536.27	0.047013	0.181979	0.0628616	0.0585794	0.0230106	0.0252298	0.0697948
8	11	886.982	0.0295109	0.043122	0.0328585	0.0333257	0.0217746	0.00415305	0.036347
8	12	1607.87	0.0447242	0.194141	0.0619985	0.0564279	0.0230106	0.0255054	0.0714885
8	13	883.442	0.028275	0.0415961	0.0316771	0.032166	0.020676	0.00413495	0.0352026
8	14	2685.13	0.0437324	0.186084	0.062313	0.0571298	0.022858	0.024745	0.0772106
8	15	1686.15	0.0439155	0.199115	0.0646555	0.0578012	0.0230411	0.0284797	0.0789197
8	16	892.219	0.0293278	0.0422065	0.0326234	0.0331426	0.0212711	0.00409116	0.0360723
8	17	1533.44	0.0419471	0.184726	0.0619898	0.0551766	0.0222934	0.0270308	0.0758755
8	18	1521.03	0.0453841	0.154025	0.0638631	0.0594644	0.0230106	0.0240275	0.0789807
8	19	900.139	0.0297856	0.043122	0.0330144	0.033402	0.0204471	0.00408754	0.036408
8	20	873.715	0.0285039	0.04448	0.0318154	0.0321813	0.0219577	0.00396873	0.035172
8	21	855.934	0.0289311	0.041825	0.03212	0.0327306	0.0190585	0.0040709	0.0355383
8	22	1425.93	0.0456245	0.158633	0.0603618	0.0551003	0.0230106	0.0213811	0.0713092
8	23	832.068	0.0292821	0.0418402	0.0322457	0.0327916	0.0213321	0.00376231	0.0354314
8	24	868.679	0.0293584	0.0504921	0.0324364	0.0328527	0.0212558	0.00386656	0.0356146
8	25	1644.96	0.0452277	0.178042	0.0647749	0.0563211	0.0227054	0.0281814	0.0779889
8	26	895.277	0.0294041	0.0490425	0.0323965	0.0328222	0.021149	0.00381672	0.0355993
8	27	1477.94	0.0444038	0.178805	0.0577635	0.0561685	0.0219883	0.0196988	0.0681621
8	28	845.901	0.0284886	0.0421607	0.0318475	0.0322423	0.0205081	0.00403458	0.0353399
8	29	1615.89	0.0512398	0.0886244	0.0589484	0.0611276	0.0228122	0.0122896	0.0690013
8	30	1600.22	0.0521706	0.0892653	0.0611751	0.0633249	0.0230106	0.0127624	0.0716564
8	31	939.861	0.0297398	0.0489204	0.0329996	0.0334325	0.0225528	0.00400743	0.0363165
8	32	861.302	0.0292973	0.0508583	0.032244	0.0327459	0.0217899	0.00383514	0.0353399
8	33	895.819	0.0293889	0.042359	0.0326441	0.0332189	0.0212253	0.00415954	0.0361486
8	34	822.897	0.0284581	0.0536965	0.0315141	0.0319371	0.020325	0.00386798	0.0346685
8	35	1686.5	0.0518196	0.0869917	0.0603506	0.0633707	0.0221714	0.0133727	0.0710613
8	36	1790.37	0.0523079	0.215641	0.0660043	0.0634928	0.0226291	0.0218509	0.0742046
8	37	901.215	0.0292821	0.0455482	0.0326669	0.0331426	0.0209506	0.00410522	0.0360876
8	38	1692.6	0.0434119	0.173297	0.0637225	0.0569009	0.0223545	0.0259124	0.0823987
8	39	826.92	0.0295262	0.0542153	0.032506	0.0328527	0.0212711	0.0038371	0.0355993
8	40	1623.31	0.0421607	0.201831	0.0626327	0.053666	0.0230106	0.0285564	0.0751507
8	41	1719.1	0.047364	0.192721	0.0677612	0.0595407	0.0230259	0.0291252	0.0819715
8	42	1723.37	0.0437552	0.259937	0.0649763	0.0562219	0.0228885	0.0314486	0.0758373
8	43	910.708	0.029572	0.0464485	0.0327122	0.0333562	0.0218509	0.00393699	0.035996
8	44	826.561	0.0280613	0.0417029	0.0312712	0.0317693	0.0209964	0.0039338	0.0346075
8	45	878.871	0.0294041	0.0543526	0.0325737	0.0329976	0.0214694	0.00395389	0.0358434
8	46	1643.12	0.0563058	0.0887312	0.0644285	0.0660868	0.0230259	0.0124183	0.0747234
8	47	1584.97	0.0454108	0.186038	0.0645847	0.0573739	0.0230411	0.0265653	0.077821
8	48	1127.64	0.0332647	0.0614786	0.0367035	0.0372168	0.0212253	0.00498237	0.0408179
8	49	1574.73	0.0426795	0.176425	0.0626486	0.0545052	0.0222934	0.0270824	0.0762341
8	50	905.56	0.029984	0.052079	0.0334501	0.033814	0.0223545	0.0042867	0.0368505
8	51	1744.89	0.0599527	0.164645	0.0759902	0.0725567	0.0230259	0.0238097	0.085832
8	52	855.714	0.0291447	0.0595712	0.0323497	0.0327001	0.0200961	0.00393224	0.0356603
8	53	973.199	0.0315862	0.0485237	0.0351259	0.0353552	0.0218051	0.00453888	0.0386816
8	54	1682.09	0.044007	0.215717	0.0653189	0.0554208	0.0220645	0.0302547	0.0794385
8	55	1885.54	0.0502174	0.264652	0.0738326	0.0636454	0.0230106	0.0355814	0.0851301
8	56	868.101	0.0282444	0.0477455	0.0316548	0.0320287	0.0213016	0.0040419	0.0351568
8	57	1743.53	0.0530709	0.177325	0.0714912	0.070573	0.0230411	0.0228915	0.0872816
8	58	1640.37	0.0433967	0.168841	0.0621021	0.0587472	0.0226902	0.0231961	0.0763943
8	59	1718.68	0.0501106	0.220798	0.0657667	0.0628061	0.0230106	0.0250053	0.0728161
8	60	1823.57	0.053193	0.18996	0.0730362	0.0688487	0.0230106	0.0264677	0.088014
8	61	998.15	0.0316625	0.0460365	0.0354004	0.0357061	0.0222477	0.00466658	0.0393835
8	62	1698.26	0.0533303	0.227573	0.0704031	0.0661784	0.0230106	0.0263596	0.0789654
8	63	947.045	0.0304265	0.0707866	0.0336823	0.0341497	0.0186923	0.00411678	0.0369879
8	64	1832.96	0.0466316	0.217716	0.068609	0.0605783	0.0230259	0.0302542	0.0835126
8	65	854.852	0.031342	0.0492409	0.035012	0.0352941	0.0230106	0.00456427	0.0385748
8	66	979.8	0.0319829	0.0736858	0.0356914	0.0359503	0.0230259	0.00469851	0.0396887
8	67	1021.34	0.0333715	0.0581674	0.0372478	0.037583	0.0230106	0.00478881	0.0414588
8	68	1464.28	0.047425	0.150439	0.0601694	0.058854	0.0230106	0.0187369	0.0693065
8	69	947.917	0.0318227	0.0502632	0.035378	0.0356756	0.0230564	0.00444408	0.03888
8	70	1649.46	0.0478523	0.1561	0.064319	0.0585794	0.0216068	0.0249524	0.0716564
8	71	1721.86	0.0460822	0.193515	0.0674684	0.0599832	0.0230411	0.0288945	0.0807927
8	72	961.946	0.0334478	0.0509499	0.0379346	0.038117	0.0230106	0.00545654	0.0427405
8	73	1669.88	0.0515984	0.206775	0.0739996	0.0669108	0.0230106	0.0295521	0.0902495
8	74	1621.36	0.0467842	0.235538	0.0651043	0.0597238	0.0230259	0.0254734	0.0775311
8	75	1845.3	0.0348821	0.0565805	0.0388182	0.0402686	0.0221561	0.00504786	0.0430152
8	76	905.977	0.030045	0.0519265	0.0332725	0.0336156	0.0223239	0.0040057	0.0365454
8	77	1740.73	0.0478828	0.196841	0.0681222	0.0595331	0.0231785	0.0289676	0.0837262
8	78	1775.05	0.0521859	0.17258	0.0712355	0.066041	0.0230106	0.0267635	0.083299
8	79	1605.93	0.0557565	0.0921187	0.0648102	0.0659648	0.0228428	0.0125887	0.0754406
8	80	1438.97	0.050763	0.0867018	0.060494	0.0622721	0.0220951	0.0137478	0.0720531
8	81	936.838	0.0316167	0.0718395	0.0350652	0.0353552	0.022385	0.00440092	0.0383917
8	82	870.747	0.0300755	0.0602121	0.0332702	0.0335393	0.0223697	0.00395591	0.0364996
8	83	943.794	0.031632	0.0784466	0.0351624	0.0356451	0.0230259	0.00452196	0.0386816
8	84	1782.32	0.0486152	0.217639	0.0696409	0.0612345	0.0230106	0.0280994	0.0863966
8	85	1677.36	0.0449531	0.216007	0.0654274	0.0574502	0.0230564	0.0286905	0.0783551
8	86	1671.64	0.0486458	0.218769	0.0656343	0.0578164	0.0224765	0.0282975	0.0726635
8	87	1652.65	0.0559091	0.0934615	0.064348	0.066041	0.0230259	0.0130871	0.0750134
8	88	1693.78	0.0466888	0.159594	0.0674194	0.0606699	0.0230259	0.0259039	0.0856489
8	89	1670.55	0.0468147	0.180819	0.0658239	0.0616617	0.0230411	0.0243941	0.0813153
8	90	885.66	0.0300603	0.0436866	0.0335834	0.0340124	0.0223697	0.00430372	0.0371862
8	91	1572.48	0.0457923	0.144961	0.0641829	0.0596628	0.0230106	0.0224153	0.0813306
8	92	1397.02	0.0403754	0.147234	0.0569841	0.0514687	0.0215152	0.0224775	0.0688182
8	93	1605.2	0.0526436	0.173968	0.064679	0.0618296	0.0230106	0.0207963	0.0703899
8	94	910.011	0.0322728	0.0457771	0.0355612	0.0360266	0.0227207	0.00446245	0.0392844
8	95	916.183	0.0306706	0.0803998	0.0339264	0.0343023	0.0226749	0.00420184	0.0371862
8	96	904.742	0.0298466	0.0432136	0.0331225	0.0336461	0.0216678	0.0040385	0.0365454
8	97	909.635	0.0295109	0.0423743	0.0328293	0.0333104	0.0210575	0.00407468	0.0362707
8	98	1487.42	0.045243	0.159091	0.0615805	0.0553445	0.0230259	0.0226983	0.0752041
8	99	976.061	0.0312963	0.0459602	0.0348183	0.0353399	0.0221866	0.00450907	0.038468
8	100	1550.26	0.0493477	0.171862	0.0647886	0.0620127	0.0230106	0.0222504	0.0738537
8	101	867.818	0.0299687	0.0525368	0.0332395	0.0335699	0.0219577	0.00397535	0.0365911
8	102	901.322	0.0288853	0.0531319	0.0324543	0.0328527	0.0192264	0.00437444	0.0361181
8	103	1335.49	0.0378729	0.193454	0.0544234	0.0477455	0.0206455	0.0259149	0.0609293
8	104	813.203	0.0302892	0.0476387	0.0341238	0.0344701	0.0210422	0.00482869	0.0380713
8	105	871.043	0.0295415	0.0430304	0.0330793	0.0337072	0.0213779	0.00439847	0.0367895
8	106	1594.98	0.0480507	0.169268	0.0676069	0.0630198	0.0230106	0.0253305	0.0823224
8	107	908.658	0.0299992	0.0554055	0.033644	0.0341039	0.0208438	0.0044994	0.0373541
8	108	1697.11	0.0470741	0.192859	0.067407	0.0623178	0.0230106	0.0268464	0.0809186
8	109	663.702	0.0273442	0.0375677	0.0300236	0.0304265	0.0205844	0.00331421	0.0328069
8	110	825.34	0.0294347	0.0522927	0.0327555	0.0331884	0.0215	0.00415735	0.036286
8	111	1696.12	0.0487488	0.261982	0.0638624	0.063508	0.0230106	0.0210048	0.0745098
8	112	1581.84	0.0465858	0.162707	0.0647659	0.0595407	0.0230259	0.0239127	0.0791333
8	113	1570	0.0464179	0.201038	0.0650615	0.0604715	0.0217441	0.0259539	0.0767529
9	1	1406.09	0.0436408	0.0755474	0.0507777	0.0527504	0.0215763	0.0113142	0.0597238
9	2	1234.98	0.0331273	0.149355	0.0470145	0.0425269	0.0201572	0.0187838	0.0557412
9	3	816.292	0.0275578	0.0386511	0.0304359	0.0309758	0.0211032	0.00355394	0.0334325
9	4	667.266	0.0259709	0.037705	0.0282405	0.0283513	0.020676	0.00276254	0.0305333
9	5	789.635	0.0275731	0.0418097	0.030663	0.03122	0.0198367	0.00376353	0.0338293
9	6	1084.79	0.0292821	0.162585	0.0447852	0.0356603	0.019852	0.0229151	0.0526436
9	7	1389.77	0.0334783	0.176181	0.0504162	0.0433509	0.0206149	0.02302	0.060708
9	8	832.918	0.0281338	0.0381933	0.030718	0.031342	0.021149	0.00333243	0.0334668
9	9	2504.29	0.0518349	0.0821088	0.0576919	0.0602579	0.0227512	0.0101545	0.0652934
9	10	832.567	0.0278172	0.0473945	0.0307039	0.0311894	0.0209201	0.00356035	0.0337072
9	11	742.733	0.0272984	0.037705	0.0299139	0.030457	0.0211032	0.0032561	0.0326238
9	12	1272.69	0.0317845	0.18233	0.0481423	0.0403296	0.0206607	0.0231977	0.0570687
9	13	836.708	0.0277714	0.0386206	0.030596	0.0311131	0.0204318	0.0035141	0.0335546
9	14	838.868	0.0276799	0.0378729	0.0303597	0.0308995	0.0210575	0.00335481	0.0331731
9	15	1391.33	0.0436561	0.0704356	0.0499384	0.0519265	0.0225528	0.00977271	0.0576181
9	16	1319.39	0.0367475	0.166339	0.0535096	0.0486	0.0229038	0.0219416	0.0638437
9	17	1342.47	0.0337034	0.144793	0.0508915	0.045655	0.0218662	0.0210049	0.0643778
9	18	851.466	0.028397	0.0470588	0.0311881	0.0316625	0.0213169	0.00358352	0.0341497
9	19	781.523	0.0281071	0.0409247	0.0310141	0.0315251	0.0201419	0.00358272	0.0340276
9	20	1308.1	0.0421302	0.0712596	0.0483747	0.0496834	0.0211795	0.00957846	0.0562448
9	21	719.098	0.0270848	0.0368811	0.0294398	0.0299382	0.0201267	0.00301572	0.0318914
9	22	833.367	0.028397	0.0429389	0.031468	0.0319524	0.0210422	0.00379035	0.0346838
9	23	916.748	0.030808	0.0762798	0.0336495	0.0342107	0.0219425	0.00399005	0.0366979
9	24	822.854	0.0280613	0.0394293	0.0307402	0.031281	0.0206455	0.00335515	0.0335393
9	25	1345.83	0.0381628	0.139284	0.0559781	0.0500343	0.0228122	0.0221283	0.0706035
9	26	857.212	0.0283207	0.0419165	0.0310472	0.0315251	0.0213779	0.00351311	0.0338903
9	27	858.936	0.0285649	0.0398413	0.0312568	0.0317693	0.0218662	0.00346139	0.0341344
9	28	790.402	0.0285649	0.0436103	0.0311722	0.031754	0.020737	0.00337834	0.0339513
9	29	1324.21	0.0349432	0.165942	0.0516444	0.0433509	0.0220798	0.0238363	0.0614176
9	30	1356.06	0.0328069	0.185199	0.0519881	0.0417334	0.0224918	0.0259459	0.0657511
9	31	855.273	0.0287175	0.0410315	0.0315087	0.0320287	0.0222019	0.00351568	0.0344396
9	32	891.088	0.0296941	0.0412604	0.0324847	0.03299	0.0197299	0.00362035	0.035462
9	33	1143.9	0.0366674	0.10341	0.0466592	0.0440375	0.0214542	0.0139362	0.0532082
9	34	907.301	0.0291905	0.0407111	0.0319461	0.0324254	0.0199893	0.00351531	0.0348974
9	35	1391.04	0.0347448	0.182269	0.0533988	0.0431525	0.0229953	0.0266576	0.0645457
9	36	867.738	0.0287175	0.0401312	0.0314136	0.0319448	0.0211185	0.00344861	0.034287
9	37	825.393	0.0283207	0.046479	0.03085	0.0313878	0.0212711	0.00333144	0.0335851
9	38	1386.02	0.0358434	0.184558	0.052964	0.0455177	0.0229648	0.0238449	0.0627146
9	39	855.413	0.0283818	0.0435645	0.0314779	0.0319524	0.0209201	0.00378182	0.0346838
9	40	905.621	0.028397	0.041001	0.031332	0.0317388	0.0215763	0.00362882	0.0343938
9	41	1312	0.0353552	0.176226	0.0528479	0.0466011	0.0230106	0.02221	0.0654307
9	42	1340.48	0.0476692	0.0740368	0.0538777	0.0556497	0.0230106	0.00965577	0.0614481
9	43	1372.85	0.0353704	0.180179	0.0530162	0.0437781	0.0230106	0.0235321	0.0664225
9	44	1487.83	0.0422065	0.179629	0.0551886	0.0503853	0.0225834	0.022535	0.0588846
9	45	887.166	0.0285649	0.050721	0.0314966	0.0319524	0.021561	0.00362281	0.0345159
9	46	1516.09	0.0354314	0.242344	0.0564293	0.0437781	0.0230106	0.0356793	0.0618906
9	47	838.055	0.0280461	0.038529	0.030821	0.0312505	0.0189517	0.00343555	0.0337072
9	48	1312.57	0.0458534	0.0715953	0.0513023	0.0525902	0.0225986	0.00866378	0.0581674
9	49	1304.92	0.0355535	0.151446	0.050356	0.0441291	0.0222629	0.0203375	0.0607309
9	50	862.235	0.0283322	0.0406348	0.0314329	0.0319066	0.0213169	0.00374036	0.0345769
9	51	783.845	0.0279393	0.038117	0.0304595	0.0309911	0.020264	0.00323701	0.0331426
9	52	892.019	0.0296788	0.0438087	0.0332446	0.0336919	0.0225376	0.00430812	0.0367437
9	53	1497.67	0.0377813	0.218357	0.0572656	0.0480964	0.0230411	0.0274201	0.0679179
9	54	1002.45	0.029984	0.0467842	0.0330243	0.0334325	0.0209049	0.00393143	0.0362249
9	55	956.037	0.0307012	0.0444343	0.0337751	0.0343328	0.0227054	0.00398386	0.0370794
9	56	1399.55	0.0349279	0.165911	0.0522806	0.0438392	0.0224765	0.0229621	0.0648966
9	57	889.003	0.0293278	0.0509804	0.0323733	0.0329595	0.0214084	0.00384064	0.035584
9	58	813.307	0.0280461	0.0400092	0.0306758	0.0312352	0.0207218	0.00333348	0.0334478
9	59	839.717	0.0287938	0.0399786	0.0315174	0.0319371	0.022034	0.0034896	0.0344091
9	60	754.309	0.0275425	0.0372778	0.0300653	0.0305791	0.0192874	0.00316726	0.0327306
9	61	938.278	0.0306096	0.0440833	0.0337607	0.0342107	0.0218051	0.00404859	0.0370794
9	62	1259.69	0.0327611	0.137743	0.0480744	0.0403601	0.0215	0.0225228	0.0546883
9	63	1669.81	0.031281	0.0446632	0.0340973	0.0350805	0.0220188	0.00383933	0.0371557
9	64	934.56	0.0316625	0.055314	0.0345608	0.0351568	0.0227817	0.00405317	0.0377813
9	65	1025.63	0.0308385	0.116091	0.0339963	0.0345159	0.0229801	0.0043915	0.0370794
9	66	1459.47	0.0490272	0.0832685	0.0559698	0.0575875	0.0230106	0.0105618	0.06421
9	67	963.34	0.0301823	0.0448768	0.0332507	0.0336614	0.0225376	0.00376275	0.0363775
9	68	871.032	0.0288243	0.0442817	0.0316049	0.0321202	0.0207218	0.00356647	0.0345922
9	69	1346.23	0.0331579	0.178592	0.0518358	0.041825	0.0223392	0.0271191	0.0607042
9	70	731.918	0.0277409	0.037995	0.0302721	0.0308385	0.0211643	0.00323785	0.0329595
9	71	880.782	0.0306706	0.0440528	0.0341534	0.0344549	0.0223392	0.00423379	0.0376135
9	72	1465.1	0.0382849	0.162249	0.0553203	0.0491035	0.0230259	0.0219578	0.0670176
9	73	1440.77	0.0407568	0.193591	0.0573395	0.046952	0.0230106	0.030365	0.0562142
9	74	883.667	0.030396	0.0416419	0.0332356	0.0337377	0.0223239	0.00359919	0.0362402
9	75	2582.86	0.044007	0.171283	0.0612327	0.0545815	0.0230106	0.023395	0.0738041
9	76	1420.27	0.035996	0.157229	0.0529834	0.0474403	0.0223392	0.0203807	0.0664683
9	77	832.816	0.0286717	0.0428168	0.0311589	0.0317082	0.0216983	0.00331495	0.0338903
9	78	1210.47	0.0372931	0.121889	0.0495767	0.0467689	0.022446	0.0171195	0.0568399
9	79	696.943	0.0268711	0.0369879	0.0293203	0.0297551	0.0206302	0.00309662	0.0318456
9	80	2721.15	0.0423133	0.207324	0.0596116	0.0508125	0.0228885	0.0248577	0.0719005
9	81	1358.17	0.0377508	0.140749	0.0542876	0.0477607	0.0230106	0.020635	0.0668193
9	82	952.125	0.0302434	0.0441138	0.0330129	0.0334478	0.0214237	0.00355252	0.0360113
9	83	1394.06	0.035996	0.156374	0.053937	0.0469978	0.0230106	0.0234287	0.0662394
9	84	1465.71	0.0374914	0.208255	0.0559069	0.045243	0.0226139	0.0285108	0.0640879
9	85	852.033	0.0285954	0.0416114	0.0315696	0.0321813	0.0207675	0.00369114	0.0346838
9	86	831.674	0.0283513	0.0400549	0.0308931	0.0313878	0.0206912	0.00329371	0.0336461
9	87	1327.96	0.0439918	0.0737011	0.0506776	0.0518349	0.0226444	0.0100863	0.0589609
9	88	710.987	0.0269322	0.0446479	0.0292095	0.0296025	0.0188296	0.00305584	0.0316472
9	89	957.464	0.0321355	0.0551919	0.0351789	0.0354162	0.0229496	0.00385146	0.0381933
9	90	1499.33	0.0392462	0.163775	0.0544122	0.0494392	0.0220035	0.0202743	0.064744
9	91	998.274	0.0315099	0.0486	0.0345579	0.0349584	0.0230106	0.00384126	0.0376593
9	92	923.654	0.0298924	0.042237	0.0327897	0.0331884	0.0228428	0.00363695	0.0358282
9	93	1476.2	0.0475013	0.0772412	0.0531486	0.0543069	0.0224155	0.00903422	0.0603799
9	94	891.553	0.0286564	0.0435187	0.0315482	0.032105	0.0202792	0.003537	0.0345312
9	95	859.198	0.0282902	0.0417182	0.0309075	0.0314183	0.0208896	0.00328613	0.0336614
9	96	1252.62	0.0382849	0.125093	0.0500949	0.0462043	0.0212253	0.0172295	0.0559243
9	97	737.568	0.0267796	0.0389258	0.0293676	0.0297093	0.0202487	0.00318013	0.0320897
9	98	624.278	0.0257572	0.0359808	0.0278945	0.0282444	0.0202335	0.0026236	0.0300145
9	99	1438.65	0.0379492	0.197284	0.0553008	0.0460365	0.0222019	0.0263055	0.0625925
9	100	1403.49	0.037995	0.180072	0.055703	0.0472572	0.022858	0.0242658	0.065568
9	101	899.657	0.0309606	0.0447242	0.0342648	0.0347143	0.0230106	0.00409489	0.0375982
9	102	1360.32	0.0373541	0.135805	0.0525665	0.047303	0.0230259	0.0194197	0.0627146
9	103	894.031	0.0295262	0.0433509	0.0324289	0.0328527	0.0224918	0.00364631	0.0355077
9	104	916.589	0.0291905	0.0770123	0.0319893	0.0325475	0.0216068	0.00370542	0.0349737
9	105	1289.26	0.0354772	0.156054	0.0519652	0.0448463	0.0230106	0.0226166	0.0608682
9	106	1194.22	0.0321355	0.135042	0.0488196	0.0415045	0.0204776	0.02118	0.0617762
9	107	649.91	0.0260319	0.0350042	0.0281602	0.028542	0.0199283	0.0026522	0.0303349
10	1	965.724	0.0307469	0.0429694	0.03356	0.034165	0.0220798	0.00393381	0.0367285
10	2	697.275	0.0260624	0.0387274	0.028248	0.0285039	0.0202335	0.00278204	0.0304723
10	3	1588.09	0.0433776	0.222019	0.0631722	0.0557717	0.0219272	0.0281053	0.0757305
10	4	907.507	0.0314946	0.0581674	0.0340732	0.0345312	0.0220188	0.00371694	0.0368658
10	5	948.364	0.0315862	0.0471656	0.0348024	0.035172	0.0217136	0.00441934	0.0383001
10	6	1613.24	0.0408331	0.154467	0.0597985	0.0522011	0.0205997	0.0264033	0.0721294
10	7	1743.81	0.0502785	0.186053	0.0661587	0.0643015	0.0229801	0.0215457	0.0807202
10	8	1758.83	0.0495918	0.170565	0.0666958	0.0616617	0.0230106	0.0236161	0.0794385
10	9	938.183	0.0303502	0.043122	0.0334982	0.0339361	0.0208286	0.00396768	0.0367742
10	10	1324.58	0.0436408	0.0726024	0.0502419	0.0518044	0.021561	0.0104686	0.0587472
10	11	1743.66	0.0489509	0.180362	0.0688949	0.0621195	0.0229648	0.0274397	0.083711
10	12	1719.55	0.047013	0.173297	0.0656116	0.0609445	0.0230106	0.0245609	0.0796063
10	13	911.999	0.0300755	0.047715	0.0330542	0.0335088	0.0216831	0.00384196	0.0362249
10	14	1575.96	0.0522316	0.0922866	0.0603979	0.0622873	0.0212253	0.0131221	0.0710575
10	15	889.107	0.0312657	0.04477	0.0343046	0.0348363	0.0215457	0.00401988	0.0375525
10	16	1792.29	0.0467689	0.186343	0.066571	0.0582589	0.0230106	0.0285566	0.0783474
10	17	884.266	0.0300298	0.0432288	0.0329164	0.0334478	0.0218662	0.00380901	0.0359808
10	18	1632.4	0.044892	0.169329	0.0637407	0.0557259	0.0227359	0.0248586	0.0835584
10	19	923.742	0.0299535	0.0421302	0.0329179	0.033463	0.0218814	0.00378585	0.0361028
10	20	1546.71	0.0439002	0.156924	0.0634338	0.0560006	0.0227817	0.0250073	0.0809949
10	21	1447.77	0.0424964	0.164691	0.0546327	0.0534066	0.0230106	0.0165461	0.0632944
10	22	901.509	0.0301442	0.0661173	0.0332145	0.0337377	0.0218814	0.00391881	0.0364538
10	23	3022.94	0.0503243	0.183215	0.0699204	0.0619364	0.022034	0.0275995	0.0871595
10	24	915.703	0.030045	0.0560006	0.0326862	0.03299	0.0220645	0.0036112	0.035584
10	25	1660.21	0.0313573	0.0508736	0.0340836	0.0349432	0.0223545	0.0038897	0.0371405
10	26	894.198	0.0297856	0.0483711	0.0324632	0.0328374	0.0219425	0.00351261	0.0353552
10	27	918.486	0.029099	0.0546731	0.0319896	0.0323644	0.0209506	0.0037717	0.0351415
10	28	1692.15	0.0457923	0.187045	0.0635978	0.0571756	0.0221561	0.0264082	0.0731518
10	29	891.857	0.0295262	0.0483406	0.0325056	0.0329442	0.0219577	0.00378229	0.0356909
10	30	885.621	0.0310216	0.0444953	0.0342905	0.0345769	0.0230106	0.00419273	0.0376173
10	31	1474.05	0.0454108	0.131258	0.0585311	0.0565805	0.022385	0.0181507	0.0684672
10	32	1670.37	0.0476081	0.194797	0.0629829	0.0589151	0.0230106	0.0248807	0.070222
10	33	891.878	0.0299535	0.0527657	0.0327872	0.0330816	0.0222477	0.00367745	0.0358129
10	34	1521.02	0.0537575	0.0848859	0.0608067	0.0626383	0.0227665	0.0121866	0.0705272
10	35	1600.97	0.0454261	0.18262	0.0648349	0.0572366	0.0230259	0.0267234	0.0790723
10	36	982.886	0.031281	0.0785687	0.0361594	0.0350347	0.0222477	0.00808356	0.0376135
10	37	936.885	0.030457	0.0425116	0.0333067	0.0337987	0.0225223	0.00379908	0.0364233
10	38	895.544	0.0295872	0.0415656	0.0324097	0.0328069	0.021622	0.00360314	0.0354009
10	39	943.213	0.0295415	0.0442969	0.032453	0.0329595	0.0217594	0.00367786	0.0355383
10	40	1331.71	0.0426795	0.172702	0.0609451	0.0545052	0.0228885	0.0240653	0.0737316
10	41	1577.21	0.0497826	0.141512	0.0605524	0.0604105	0.0226444	0.0157807	0.0711833
10	42	927.48	0.0309911	0.0505531	0.0340272	0.0345312	0.0223392	0.00403233	0.0372625
10	43	1754.34	0.0462196	0.256855	0.0655021	0.0572213	0.0211795	0.0296045	0.0754406
10	44	880.367	0.029572	0.0456245	0.0322893	0.0327001	0.0223392	0.00352671	0.0352178
10	45	1630.38	0.054551	0.118196	0.06276	0.0648661	0.0225528	0.0132105	0.0729076
10	46	1517.52	0.0431373	0.143374	0.0584854	0.0560769	0.0218509	0.0208808	0.0688945
10	47	933.056	0.0309453	0.0612802	0.0333365	0.0339361	0.0220798	0.00348035	0.0360723
10	48	945.986	0.0308843	0.0501411	0.0337623	0.0339055	0.0220798	0.00388685	0.0369421
10	49	929.023	0.0301976	0.0537575	0.0331073	0.0334478	0.0212406	0.003729	0.0361944
10	50	797.628	0.028336	0.0448768	0.0310301	0.0312352	0.0213474	0.00338551	0.0338903
10	51	996.203	0.0316167	0.044007	0.0344409	0.0346532	0.0211337	0.00400445	0.0375219
10	52	1563.42	0.0430915	0.183322	0.0612819	0.0540017	0.0225681	0.0252456	0.0741894
10	53	845.987	0.0287633	0.0480049	0.0314271	0.0316625	0.0213016	0.00335724	0.0341802
10	54	1653.69	0.0466621	0.133944	0.0649729	0.0645609	0.0225376	0.0219268	0.0799573
10	55	907.804	0.0305791	0.0461738	0.0333825	0.0337987	0.0220493	0.00373682	0.0363928
10	56	1543.84	0.0419928	0.157504	0.0601769	0.0540627	0.021912	0.0235358	0.074876
10	57	1721.11	0.0478676	0.160281	0.0642972	0.0605325	0.021622	0.0229574	0.079118
10	58	1446.44	0.0376287	0.171725	0.0547356	0.047303	0.0208896	0.024246	0.0643549
10	59	932.035	0.031754	0.0529488	0.0348685	0.0351415	0.0222934	0.00412739	0.038056
10	60	1631.15	0.0445563	0.182147	0.0630519	0.0580453	0.0216678	0.0254056	0.0745556
10	61	1560.58	0.0436408	0.202274	0.0627746	0.0559548	0.0213779	0.0270854	0.0746929
10	62	1493.81	0.0429084	0.164218	0.0580254	0.0562905	0.0216831	0.0207398	0.0677501
10	63	1026.6	0.0324407	0.045182	0.0356606	0.0360723	0.0207523	0.0043027	0.0391241
10	64	968.495	0.0319982	0.0441596	0.0346795	0.035172	0.0217136	0.00397556	0.0377356
10	65	1533.79	0.0445258	0.178164	0.0595325	0.0546578	0.0218357	0.0229267	0.0684062
10	66	982.937	0.0323339	0.0521706	0.0356136	0.0359503	0.0218814	0.00437219	0.0392767
10	67	1629.49	0.0540627	0.0869306	0.0613028	0.0634775	0.0224002	0.0124094	0.0710765
10	68	848.439	0.028275	0.0396887	0.0310295	0.0314183	0.0207828	0.00360845	0.0340581
10	69	1615.19	0.0452087	0.183902	0.0632043	0.0557259	0.0199893	0.0258382	0.0742657
10	70	947.527	0.0311589	0.0503243	0.0337474	0.0341039	0.0220035	0.00369563	0.0366979
10	71	868.389	0.0289464	0.0492561	0.0315847	0.0318914	0.0222477	0.00345522	0.0344396
10	72	1793.75	0.0477684	0.24567	0.0655083	0.0580911	0.0224308	0.0312073	0.0691844
10	73	919.959	0.0325322	0.04477	0.0354198	0.0359503	0.0224002	0.00426692	0.0386816
10	74	1477	0.0493782	0.0791943	0.0564473	0.05832	0.022385	0.0113879	0.0656748
10	75	963.177	0.0317388	0.0508278	0.0348459	0.0351263	0.0223087	0.0042675	0.0382391
10	76	940.314	0.0307469	0.0631266	0.0334691	0.0338903	0.0213016	0.00384166	0.0364538
10	77	849.439	0.0277104	0.0403143	0.0304327	0.0307927	0.0209964	0.00345708	0.0333562
10	78	1613.91	0.0415351	0.177508	0.0613142	0.0514839	0.0212558	0.0267094	0.078996
10	79	2777.63	0.0599832	0.0862745	0.0647043	0.068513	0.0223392	0.0118049	0.0729229
10	80	1481.25	0.0499428	0.0821393	0.05722	0.0588998	0.0225681	0.0114903	0.066331
10	81	865.831	0.028809	0.0406653	0.0316112	0.0320287	0.0214237	0.00362292	0.0346685
10	82	904.94	0.0295262	0.0519265	0.0324782	0.0328069	0.0214084	0.00381608	0.0356603
10	83	914.382	0.0313726	0.0591592	0.0339477	0.0345922	0.0217288	0.00398797	0.0369116
10	84	860.356	0.0289616	0.0393225	0.0314561	0.0317082	0.0217594	0.00323244	0.034165
10	85	653.757	0.0257877	0.0355383	0.0279491	0.0281834	0.0205234	0.00265125	0.0301213
10	86	1530.84	0.0506905	0.148592	0.0596751	0.0605478	0.0219425	0.0156323	0.0686809
10	87	1444.01	0.0408484	0.140536	0.051842	0.0513161	0.0217899	0.0167495	0.0612497
10	88	1454.1	0.0383001	0.165316	0.0570774	0.048661	0.0217441	0.0246632	0.0718242
10	89	1538.6	0.0499733	0.0764935	0.0560468	0.0585794	0.021973	0.0110686	0.0645151
10	90	969.115	0.0327916	0.0476997	0.0353782	0.0360418	0.0220798	0.00419317	0.038468
10	91	871.92	0.0287633	0.042359	0.0314704	0.0318914	0.0221103	0.00354281	0.0344091
10	92	831.089	0.0299687	0.0474403	0.0326416	0.03299	0.021973	0.00350753	0.035523
10	93	889.927	0.0289921	0.040177	0.0316903	0.0320439	0.0214237	0.0034085	0.0345617
10	94	848.173	0.0291142	0.0414893	0.0321192	0.0325933	0.0219883	0.00376566	0.0352941
10	95	612.33	0.0256352	0.0353704	0.0277349	0.0279393	0.019791	0.00260536	0.0298466
10	96	1432.48	0.0407874	0.156573	0.0565236	0.049485	0.0213779	0.0252016	0.0629358
10	97	866.249	0.0295262	0.0426032	0.0321524	0.0325475	0.0218967	0.00347318	0.0350195
10	98	868.604	0.0291905	0.046891	0.0320388	0.0324559	0.0213321	0.00358111	0.03505
10	99	888.892	0.030045	0.043061	0.0331775	0.0335699	0.0220188	0.00396675	0.0364691
10	100	756.938	0.0272831	0.0400549	0.0296142	0.0297704	0.0203861	0.00310054	0.032105
10	101	1510.89	0.0475471	0.142153	0.0574634	0.0574884	0.0216678	0.0150619	0.0663157
10	102	886.808	0.0289311	0.0447395	0.0317477	0.032105	0.0213016	0.00351324	0.0347143
10	103	884.891	0.0294804	0.0412757	0.0322717	0.0326848	0.0216526	0.00364489	0.0352789
10	104	912.681	0.0298619	0.0506905	0.0326611	0.0330968	0.0202029	0.00368796	0.0356909
10	105	674.472	0.0255131	0.0347601	0.0274857	0.0276799	0.0198367	0.00246159	0.0294499
10	106	1505.22	0.049012	0.0791028	0.0552153	0.0572519	0.0218051	0.0104116	0.0635386
10	107	858.525	0.028809	0.0444953	0.0316717	0.032105	0.0213169	0.00363279	0.0347295
11	1	1474.32	0.0372625	0.174975	0.0552015	0.0491798	0.0214847	0.0235146	0.0672313
11	2	1535.17	0.0496071	0.10132	0.0569762	0.0574197	0.0230259	0.0113466	0.0645151
11	3	1505.04	0.0515297	0.0831922	0.0587517	0.0605325	0.0227512	0.0106629	0.0671397
11	4	1384	0.046479	0.157549	0.058911	0.0543679	0.0230106	0.0202985	0.0663462
11	5	786.735	0.028275	0.0593729	0.0307643	0.0309911	0.0209201	0.003407	0.0334478
11	6	963.524	0.0291295	0.0421607	0.0322378	0.0326848	0.0210422	0.00388673	0.0354772
11	7	1513.42	0.0389105	0.182071	0.0567122	0.0496834	0.0230411	0.0232408	0.0692607
11	8	1566.08	0.0526131	0.133364	0.0616107	0.0623331	0.0230106	0.0130488	0.0702678
11	9	896.132	0.030396	0.0492561	0.0332196	0.0332799	0.0220188	0.00370135	0.0362097
11	10	899.035	0.0296788	0.0470893	0.0327136	0.0330663	0.0212253	0.00374529	0.0357977
11	11	878.111	0.0287785	0.0413977	0.0317489	0.0320592	0.0212253	0.00388278	0.0349737
11	12	865.91	0.028687	0.0569162	0.0317695	0.0321355	0.0216983	0.00376949	0.0349279
11	13	1488.76	0.0407874	0.187243	0.0570493	0.0522774	0.0230564	0.0230451	0.0666972
11	14	1543.16	0.0417945	0.155398	0.0602916	0.0547951	0.0230106	0.0233815	0.074342
11	15	1520.24	0.0366674	0.152697	0.0530015	0.0503319	0.0218662	0.0202425	0.0653849
11	16	1369.19	0.0419776	0.152926	0.0557804	0.0527352	0.0230259	0.0189034	0.0652476
11	17	852.67	0.0288853	0.0418555	0.0319352	0.0322271	0.0217136	0.00374698	0.035111
11	18	890.613	0.0297093	0.0419776	0.0325588	0.0329595	0.0225071	0.00357257	0.0355383
11	19	908.061	0.0294194	0.042359	0.032717	0.0330816	0.0218662	0.00407081	0.0361639
11	20	834.71	0.0303044	0.0428016	0.0330945	0.0332952	0.022858	0.00364546	0.0360266
11	21	854.404	0.0282597	0.0529183	0.0311724	0.0314488	0.0205997	0.00378104	0.0341802
11	22	883.661	0.0283093	0.0475624	0.031022	0.031281	0.0210422	0.00340185	0.033875
11	23	884.731	0.0287022	0.0417945	0.0315953	0.0319066	0.0214542	0.00355718	0.0345922
11	24	908.409	0.0300755	0.0416419	0.032706	0.0331273	0.0211032	0.0036376	0.0356603
11	25	1532.16	0.0412451	0.157931	0.0588118	0.0515755	0.0230106	0.0236733	0.0721294
11	26	1459.58	0.048661	0.0810101	0.0556901	0.057023	0.0230106	0.0105653	0.0644236
11	27	872.126	0.0285191	0.0451667	0.0318993	0.0322118	0.0217136	0.00405477	0.0353246
11	28	1426.61	0.0413214	0.157397	0.0553764	0.0531624	0.0226291	0.019042	0.0653773
11	29	1490.71	0.0482338	0.104005	0.0552175	0.0564431	0.0225986	0.0116614	0.0640879
11	30	1386.75	0.0413977	0.157855	0.0593312	0.0508125	0.0230259	0.0255144	0.0722019
11	31	901.586	0.028809	0.0418402	0.0320245	0.0323949	0.0215915	0.0038807	0.0353094
11	32	874.41	0.0290074	0.0479896	0.0321486	0.0325322	0.0213321	0.00405083	0.0354162
11	33	865.717	0.0281987	0.0397345	0.0310727	0.0313878	0.0215	0.00351745	0.0339971
11	34	872.031	0.0278782	0.0397803	0.0307291	0.0309453	0.0215305	0.00342724	0.0336156
11	35	886.634	0.0285801	0.044358	0.0313232	0.0318303	0.0212863	0.00344835	0.034165
11	36	909.138	0.0293431	0.0878614	0.0321898	0.0323644	0.0222629	0.00375032	0.0352026
11	37	930.02	0.0287327	0.0406653	0.0316732	0.0320439	0.0213779	0.0036944	0.0347753
11	38	925.364	0.0288396	0.0419928	0.0318981	0.0323186	0.0204623	0.00389283	0.035111
11	39	1432.47	0.0436866	0.134676	0.0566283	0.0535897	0.0230259	0.0175544	0.0663005
11	40	853.288	0.0274968	0.038407	0.0302874	0.0306249	0.0212406	0.0033836	0.0331121
11	41	879.804	0.0281834	0.0407721	0.0310885	0.0312963	0.0202945	0.00360889	0.0340429
11	42	1445.36	0.0403449	0.160342	0.0576736	0.052369	0.0230259	0.0233373	0.0680552
11	43	817.983	0.0277714	0.0832227	0.0308115	0.0310979	0.0202792	0.00371779	0.0337682
11	44	1567.62	0.0427405	0.201953	0.0621334	0.0538643	0.0227207	0.025999	0.0771038
11	45	1394.92	0.0395209	0.17879	0.0580152	0.0487984	0.0213779	0.0264117	0.0694743
11	46	2496.14	0.0383154	0.125933	0.0532477	0.0477455	0.0230259	0.0198096	0.0644236
11	47	1469.73	0.0386053	0.143938	0.0549966	0.0507668	0.0221714	0.0195756	0.0683604
11	48	907.118	0.0298009	0.0440375	0.0331186	0.0333104	0.0223087	0.00417265	0.0366064
11	49	918.675	0.0301061	0.0435645	0.0330994	0.0332799	0.0221561	0.00388539	0.0363012
11	50	841.295	0.0275731	0.0403601	0.0305725	0.0308385	0.0211032	0.00356862	0.0336004
11	51	1393.78	0.0425116	0.148882	0.0582029	0.0552529	0.0230259	0.0189524	0.0726635
11	52	990.049	0.0302586	0.0586709	0.0337682	0.0339818	0.0226444	0.00427228	0.0371862
11	53	1392.05	0.0360876	0.148592	0.0543323	0.0463264	0.0230106	0.0234879	0.0677043
11	54	928.025	0.0320134	0.0651865	0.0352071	0.0354925	0.0216678	0.00442432	0.0384833
11	55	919.529	0.0299535	0.103578	0.0330338	0.0332341	0.0225681	0.00416227	0.0361791
11	56	2905.73	0.0448157	0.189441	0.0610025	0.0549477	0.0230106	0.0239494	0.0712863
11	57	1548.28	0.0375372	0.159823	0.0565149	0.0489204	0.0224002	0.024399	0.0699779
11	58	868.689	0.0289616	0.0432136	0.0325035	0.0328222	0.021973	0.00417228	0.035996
11	59	853.648	0.0277256	0.0473945	0.0304972	0.030808	0.0210727	0.00339256	0.0331731
11	60	1591.71	0.0300145	0.0669871	0.0331828	0.0338598	0.0212558	0.00398632	0.0364996
11	61	952.075	0.0302281	0.123445	0.0338203	0.0338903	0.0229648	0.00442931	0.0373083
11	62	1657.77	0.0532845	0.0870375	0.0610711	0.0629587	0.022385	0.0119694	0.0705425
11	63	1515.12	0.0524414	0.088838	0.0605202	0.0621881	0.0230106	0.0126907	0.0705272
11	64	840.371	0.0279545	0.0446021	0.0310421	0.0313573	0.0213474	0.00369997	0.0341802
11	65	1432.48	0.0438392	0.159228	0.0582545	0.0569619	0.0230259	0.0193691	0.0671397
11	66	999.82	0.0292363	0.0754406	0.0323933	0.0324712	0.0220188	0.00418314	0.0352636
11	67	873.378	0.0291295	0.0410163	0.0318926	0.0321508	0.0218204	0.00354904	0.0348058
11	68	789.05	0.0270085	0.0393988	0.0299962	0.0302129	0.0206455	0.00360662	0.0330358
11	69	947.625	0.0306096	0.0454719	0.0337955	0.0341497	0.0222324	0.00421335	0.0372473
11	70	1569.33	0.0437171	0.17734	0.0620238	0.0576028	0.0213169	0.0229651	0.0772259
11	71	1514.53	0.0443732	0.17438	0.0608979	0.0580148	0.0230106	0.0204789	0.0762493
11	72	1364.02	0.0362554	0.169604	0.0537121	0.0478828	0.0230106	0.0234533	0.0629358
11	73	838.976	0.0297856	0.0492714	0.0326997	0.0328756	0.0227359	0.00368211	0.0357061
11	74	866.491	0.0282292	0.0437171	0.031356	0.031754	0.0209659	0.00374847	0.0345617
11	75	2586.69	0.0408789	0.155856	0.058459	0.0518349	0.0230106	0.0232779	0.0717021
11	76	1505.9	0.0378119	0.166964	0.0542685	0.0492103	0.0225681	0.0217051	0.0633249
11	77	717.664	0.0262455	0.0358129	0.0285717	0.0287633	0.0196231	0.00290618	0.0309911
11	78	1482.84	0.0371557	0.16669	0.0544063	0.046891	0.0211032	0.0228862	0.0663615
11	79	1037.47	0.0314641	0.0788586	0.0392893	0.0368811	0.022034	0.00956748	0.0467689
11	80	1435.03	0.0404822	0.154635	0.058306	0.0528115	0.0230259	0.0225152	0.0710002
11	81	860.031	0.0293278	0.0760204	0.0322471	0.0324102	0.0219425	0.00375745	0.0352941
11	82	850.886	0.0279545	0.041413	0.0310372	0.0313573	0.0216983	0.00363558	0.034165
11	83	1535.3	0.0387884	0.180484	0.056647	0.0478523	0.0228275	0.0259702	0.0653239
11	84	891.99	0.0282139	0.0419471	0.0310744	0.0315557	0.0212558	0.00352957	0.0340734
11	85	799.919	0.0278019	0.0502632	0.0305359	0.0307774	0.0205386	0.00361066	0.0335241
11	86	871.149	0.0278019	0.0388952	0.0303981	0.0307012	0.0201419	0.00320334	0.0330968
11	87	1408.97	0.0412757	0.174517	0.0583472	0.054612	0.0223392	0.0227762	0.0684062
11	88	1390.22	0.047425	0.0766003	0.0539912	0.0555428	0.0216373	0.0107647	0.0622568
11	89	916.272	0.0309911	0.0433814	0.0339033	0.034226	0.0222477	0.00390509	0.0370336
11	90	1474.83	0.0384833	0.174044	0.0571173	0.0504616	0.0230106	0.0238579	0.0707523
11	91	2621.24	0.0401923	0.17171	0.0602322	0.0506905	0.0230106	0.0261714	0.0783551
11	92	803.834	0.0277714	0.0402991	0.0307041	0.0310521	0.0215305	0.00352088	0.0336919
11	93	886.682	0.0291142	0.041413	0.0318172	0.0321965	0.0216373	0.00359348	0.0347143
11	94	908.963	0.0310216	0.0440528	0.0340614	0.0343786	0.0229496	0.00391843	0.0372625
11	95	855.857	0.0279088	0.0408637	0.0310735	0.0315251	0.0192874	0.00376297	0.0343023
11	96	651.474	0.025864	0.0368048	0.0280977	0.0281987	0.0196231	0.00279532	0.0303807
11	97	855.593	0.0278019	0.0413825	0.0304081	0.0306249	0.0213016	0.00327268	0.0331579
11	98	896.974	0.0285191	0.0418708	0.0313025	0.0316472	0.021561	0.00345531	0.0341802
11	99	890.418	0.0287175	0.0398871	0.0315438	0.0317998	0.0225986	0.00340473	0.0344244
11	100	918.561	0.029221	0.0412451	0.0320951	0.0323949	0.0220493	0.00362053	0.035111
11	101	1371.79	0.0459297	0.0810559	0.0531147	0.0549325	0.0229801	0.0109858	0.0617227
11	102	733.382	0.026627	0.036408	0.0291094	0.0293584	0.0201267	0.00312412	0.031693
11	103	780.491	0.0272068	0.0401465	0.0300721	0.0303655	0.0206302	0.0034099	0.0329747
11	104	870.098	0.0276341	0.0397498	0.0305673	0.0308537	0.0212711	0.00351202	0.0335851
11	105	1402.15	0.0420386	0.130175	0.0554694	0.0549477	0.0224765	0.01705	0.0661479
12	1	793.097	0.027985	0.0479591	0.0307903	0.0310674	0.0206607	0.00356968	0.033753
12	2	915.726	0.0289158	0.0586557	0.0322439	0.032639	0.0211185	0.00401336	0.0355535
12	3	614.6	0.0255436	0.0345006	0.0275803	0.0277867	0.0192721	0.00254428	0.029633
12	4	1543.61	0.0498054	0.0941634	0.0576553	0.0592966	0.0230259	0.0110317	0.0665141
12	5	1486.38	0.0387274	0.162631	0.0564864	0.0527199	0.0230106	0.0216237	0.0699931
12	6	2674.87	0.0433509	0.182895	0.0614433	0.053666	0.0222019	0.02576	0.0747082
12	7	825.502	0.0269627	0.0382544	0.0295953	0.030045	0.0208743	0.00322853	0.0322881
12	8	1459.59	0.0380865	0.178195	0.0570465	0.0498512	0.0225681	0.0259882	0.0667582
12	9	878.492	0.0287175	0.0424506	0.0318918	0.0322423	0.0211337	0.00386573	0.0351415
12	10	877.444	0.028172	0.0482948	0.0311316	0.0314336	0.021149	0.0037112	0.0341955
12	11	879.447	0.0281834	0.147005	0.0312182	0.0314641	0.0197757	0.00477575	0.0342412
12	12	762.181	0.0267643	0.039353	0.0297007	0.0299382	0.0206149	0.00352874	0.0327306
12	13	1405.07	0.040238	0.159792	0.0597519	0.0558175	0.0230106	0.0236416	0.0746471
12	14	859.085	0.0278325	0.0394751	0.0305387	0.030808	0.0195468	0.00335505	0.033341
12	15	858.921	0.0277104	0.047715	0.030456	0.0307927	0.0212711	0.00341061	0.0332799
12	16	880.833	0.027924	0.04271	0.0307435	0.0310445	0.0204623	0.00346967	0.0336461
12	17	901.848	0.0283207	0.0411231	0.0310875	0.0314031	0.0216678	0.00339148	0.0339513
12	18	1534.06	0.0393988	0.192737	0.0585118	0.0523537	0.0230259	0.0256479	0.0701762
12	19	846.332	0.0277714	0.0480812	0.0307589	0.0310979	0.0197604	0.00361319	0.0337682
12	20	1504.67	0.0479477	0.0883803	0.0557677	0.0573892	0.0230106	0.0106266	0.0645609
12	21	846.619	0.027863	0.0384222	0.0306191	0.0309453	0.0204929	0.0033987	0.0335241
12	22	1420.31	0.0362707	0.166964	0.0541792	0.046128	0.0217288	0.02364	0.0688945
12	23	1576.98	0.040589	0.186297	0.0586565	0.0525063	0.0230106	0.0230063	0.0725872
12	24	1458.34	0.037995	0.163439	0.0563762	0.0480201	0.0230106	0.023392	0.0717784
12	25	928.329	0.0287022	0.0422675	0.0314965	0.0317998	0.021912	0.00344207	0.0343938
12	26	1474.86	0.0374151	0.181277	0.0563095	0.0485695	0.0230411	0.0251652	0.067628
12	27	1534.31	0.0455787	0.180407	0.0568472	0.054902	0.0230869	0.0174437	0.0645151
12	28	1363.55	0.0376287	0.172763	0.0553547	0.0478981	0.0230106	0.0242642	0.064435
12	29	874.916	0.0281224	0.055436	0.0309049	0.0311589	0.0213321	0.0034524	0.0337682
12	30	1430.9	0.0444152	0.116289	0.0544588	0.0535744	0.020798	0.0147828	0.0632944
12	31	1454.56	0.0409705	0.162188	0.0576954	0.0514382	0.0230411	0.0222345	0.0713855
12	32	1475.58	0.0386969	0.184421	0.0566853	0.0484627	0.0230106	0.0262339	0.0651865
12	33	900.105	0.0285344	0.0452888	0.0314326	0.0317082	0.0212863	0.00358526	0.0344549
12	34	975.722	0.0299992	0.048188	0.0332557	0.0335393	0.0224308	0.00398961	0.0365301
12	35	940.689	0.028809	0.0954604	0.031417	0.0317082	0.0211185	0.0034401	0.0340887
12	36	894.223	0.0293584	0.100252	0.0322801	0.0325322	0.0222782	0.00370753	0.0352331
12	37	1487.28	0.0384909	0.183551	0.056814	0.0514839	0.0230106	0.0228436	0.0700999
12	38	996.973	0.0299382	0.0516518	0.0331363	0.0333257	0.0221256	0.0039332	0.0363775
12	39	1449.54	0.0404822	0.160296	0.0570257	0.049485	0.0230106	0.0248425	0.0639124
12	40	887.797	0.0296025	0.0549325	0.0320343	0.0323186	0.0224155	0.00341596	0.0346227
12	41	1482.05	0.0483406	0.0807355	0.0554765	0.0566873	0.0230259	0.0105305	0.063798
12	42	1557.16	0.0423133	0.135317	0.0573751	0.0539406	0.0230259	0.0183176	0.0721447
12	43	893.576	0.0292973	0.0457008	0.0322929	0.0326696	0.0223087	0.00370643	0.0353704
12	44	1007.69	0.030518	0.0449531	0.0339449	0.034165	0.0219425	0.00410951	0.0372931
12	45	882.842	0.0291905	0.0509651	0.0321279	0.0324102	0.0227207	0.00363821	0.0352178
12	46	1525.54	0.0395209	0.15787	0.0565789	0.0517281	0.0230106	0.0221335	0.0685473
12	47	1534.71	0.0544289	0.0873426	0.0612854	0.0629587	0.0230106	0.0109448	0.0697185
12	48	1442.64	0.0512245	0.0853132	0.0589939	0.0599527	0.0226749	0.011035	0.0676127
12	49	1443.78	0.0408179	0.187289	0.0561042	0.0493782	0.0230106	0.022716	0.0638361
12	50	1452.7	0.0441444	0.165331	0.0591657	0.05449	0.0230106	0.0203829	0.0707218
12	51	893.143	0.0294804	0.0459297	0.0324366	0.0327611	0.0215457	0.00372675	0.0355535
12	52	976.224	0.0308843	0.0485237	0.0339674	0.0340887	0.0221408	0.00385251	0.0370947
12	53	915.363	0.0300603	0.0965744	0.0325717	0.0328985	0.0226444	0.00353079	0.0351263
12	54	1769.04	0.0440528	0.190936	0.0626654	0.057023	0.0218509	0.0237887	0.0761578
12	55	1540.32	0.0410163	0.163012	0.0599858	0.0520333	0.0230259	0.0247313	0.0737011
12	56	893.119	0.0287633	0.0413367	0.0318414	0.0321508	0.0213474	0.00370839	0.0350347
12	57	983.233	0.0306706	0.0498512	0.0336862	0.0338293	0.0212863	0.00375682	0.0366827
12	58	861.749	0.0287175	0.0416724	0.0318906	0.0322118	0.0209506	0.00379418	0.035111
12	59	1639.45	0.0459449	0.172473	0.0665307	0.0622873	0.0227207	0.0242448	0.0839094
12	60	1564.96	0.0472572	0.150896	0.0624509	0.0591592	0.0224155	0.0201785	0.0735637
12	61	908.482	0.0295567	0.0503548	0.0323545	0.0326543	0.0220798	0.00362015	0.0353246
12	62	1607.66	0.0462806	0.166766	0.0637809	0.0592355	0.0209812	0.0235495	0.0758679
12	63	1668.89	0.0560006	0.0873579	0.0628252	0.0643168	0.0215763	0.0112902	0.0716259
12	64	1482.4	0.0412985	0.183352	0.058468	0.052018	0.0230106	0.0239899	0.069276
12	65	854.775	0.0281071	0.0401923	0.0310184	0.0313268	0.0218357	0.00353915	0.0339971
12	66	1393.2	0.0369573	0.192477	0.0551215	0.0475547	0.0230106	0.0238873	0.0679484
12	67	876.476	0.0283055	0.0406348	0.0312748	0.0315251	0.0213626	0.00352739	0.034226
12	68	1490.51	0.048455	0.0813611	0.0557678	0.0569009	0.0228275	0.0105149	0.0644541
12	69	908.175	0.0299077	0.0468605	0.0328122	0.0331121	0.0213474	0.00381292	0.0359045
12	70	1468.76	0.0585794	0.0922713	0.0643771	0.0663157	0.0216678	0.0118873	0.0732738
12	71	1670.23	0.0429999	0.182712	0.0631419	0.0555581	0.0230106	0.0260425	0.079881
12	72	1428.55	0.0382849	0.200183	0.058128	0.0517739	0.0230106	0.0243122	0.0733196
12	73	946.049	0.029633	0.0522927	0.0325215	0.0327764	0.0216068	0.00359326	0.0354772
12	74	1526.63	0.0367742	0.175814	0.05589	0.047013	0.0230106	0.0277477	0.0625925
12	75	1567.81	0.0415045	0.139544	0.0590956	0.0535439	0.0227054	0.0217543	0.0755169
12	76	2770.64	0.0432593	0.176928	0.0596722	0.0525216	0.0226444	0.0253349	0.0671092
12	77	1652.46	0.0316625	0.138384	0.046909	0.0397803	0.0138552	0.0206641	0.058381
12	78	1424.37	0.0407568	0.188098	0.0578002	0.0511025	0.0222782	0.0229297	0.0711833
12	79	1449.22	0.0399786	0.162509	0.0575271	0.0488594	0.0230106	0.0241511	0.0692912
12	80	1443.03	0.0498817	0.0818494	0.056911	0.0578164	0.0230106	0.0103798	0.0654765
12	81	1485.75	0.0403296	0.178485	0.0566108	0.0530861	0.0228885	0.0211658	0.0688487
12	82	818.046	0.0272984	0.0452125	0.0300996	0.0303197	0.0209049	0.00349641	0.0330358
12	83	1390.2	0.0469062	0.125689	0.0571839	0.0569924	0.0230106	0.0146218	0.0678416
12	84	851.729	0.02916	0.041825	0.0318856	0.0323033	0.0209201	0.00357361	0.0348516
12	85	808.228	0.0272526	0.038529	0.0301668	0.030518	0.0201724	0.00353298	0.0331273
12	86	877.46	0.0279393	0.0405127	0.0309161	0.0310979	0.0213626	0.00356428	0.0339361
12	87	937.123	0.0294957	0.0662852	0.032328	0.0326543	0.0221103	0.00374998	0.0349889
12	88	847.067	0.0277447	0.0395056	0.03077	0.0310979	0.021088	0.00360652	0.0338293
12	89	1428.89	0.0489662	0.0796826	0.0550928	0.0565042	0.0230106	0.00960325	0.0627604
12	90	850.821	0.0289311	0.0446479	0.0316585	0.0319066	0.0212863	0.00343531	0.0345312
12	91	837.431	0.0278325	0.0611276	0.0306112	0.0307927	0.0212558	0.00340251	0.0334173
12	92	756.48	0.0272984	0.0447089	0.031095	0.0313115	0.0208286	0.00438888	0.0347295
12	93	618.055	0.025803	0.0369726	0.0281484	0.0282902	0.0196841	0.0028446	0.0304875
12	94	840.082	0.027863	0.0442054	0.0311858	0.0314946	0.0216983	0.00390894	0.0345159
12	95	862.657	0.0270695	0.0436103	0.0302167	0.0305791	0.0198825	0.00367333	0.0333715
12	96	824.529	0.0274815	0.0406195	0.0299785	0.0304417	0.0196994	0.00320894	0.0325475
12	97	1412.34	0.0447395	0.11603	0.0551113	0.0547494	0.0225071	0.0141625	0.0639963
12	98	1502.02	0.049134	0.0758679	0.0552538	0.0568093	0.0220798	0.0097212	0.0631113
12	99	848.89	0.0273442	0.0407568	0.0303121	0.0306554	0.0211643	0.00350287	0.0332952
12	100	1464.71	0.0385595	0.167941	0.0543734	0.0509957	0.0212253	0.0205094	0.0657816
12	101	1498.97	0.039765	0.151537	0.0544229	0.0482643	0.0224918	0.0219469	0.0620584
12	102	1410.56	0.0373999	0.156466	0.053906	0.0492561	0.0230106	0.0210669	0.0632944
12	103	752.476	0.0264134	0.0368505	0.0292292	0.0296025	0.0190127	0.00331747	0.0320439
12	104	743.802	0.0265011	0.0379187	0.0290741	0.0292668	0.0197604	0.00313829	0.0317235
12	105	873.63	0.0285649	0.0445258	0.0311855	0.0314946	0.02121	0.00341342	0.0339971
13	1	1727.83	0.0546349	0.0899672	0.0631862	0.0651179	0.0225071	0.01301	0.0738651
13	2	1786.72	0.0475013	0.204578	0.0661627	0.0575875	0.0223545	0.0323546	0.0694285
13	3	2520.41	0.041001	0.155291	0.0546526	0.0509499	0.0207828	0.0201672	0.0632639
13	4	1628.76	0.0442206	0.193057	0.0655516	0.0606699	0.0230411	0.0260574	0.0823987
13	5	959.97	0.0296635	0.0485542	0.033017	0.0334325	0.021622	0.00414256	0.0364233
13	6	931.56	0.0298314	0.0428473	0.0331316	0.0335546	0.022446	0.00408115	0.0364996
13	7	867.357	0.0283665	0.0534371	0.0314841	0.0318761	0.0206302	0.00389384	0.0347295
13	8	1646.41	0.0562142	0.0923018	0.0650496	0.0662089	0.0229496	0.0133139	0.076257
13	9	1602.68	0.0441749	0.16849	0.0613701	0.0557412	0.0226749	0.022786	0.0749981
13	10	953.028	0.0311589	0.0518807	0.0345363	0.0348821	0.0206912	0.00436766	0.037995
13	11	1002.63	0.0298161	0.0434272	0.0329498	0.0333715	0.0215763	0.00394727	0.0362249
13	12	883.429	0.0285954	0.050721	0.0316846	0.0319829	0.0201114	0.00373164	0.0348211
13	13	1404.71	0.0362249	0.138933	0.0539297	0.0493935	0.0215457	0.0210879	0.0694476
13	14	833.848	0.0282139	0.0405432	0.0310246	0.0315251	0.0185397	0.00363042	0.0340581
13	15	877.052	0.0285954	0.0419013	0.0317646	0.0321202	0.0211948	0.00385666	0.0349889
13	16	1674.24	0.0429694	0.210239	0.0631313	0.0557565	0.0230259	0.0287857	0.0743572
13	17	892.673	0.0293736	0.0568704	0.0325698	0.0329137	0.0206149	0.00399755	0.0358434
13	18	885.789	0.0295109	0.0460517	0.0330592	0.033341	0.0221561	0.0042426	0.0366217
13	19	914.573	0.0301823	0.056672	0.0334775	0.0338293	0.0219272	0.00403791	0.036759
13	20	1718.52	0.0509613	0.146365	0.06427	0.0621653	0.0230106	0.0194261	0.0720073
13	21	942.437	0.0299077	0.0432288	0.0330691	0.0334478	0.0222934	0.00394409	0.036347
13	22	915.271	0.029633	0.0461128	0.0328891	0.0333104	0.020798	0.00399443	0.0362402
13	23	914.656	0.0298009	0.0471199	0.0332457	0.0336309	0.0223545	0.00417588	0.0367132
13	24	775.533	0.0267185	0.0373693	0.0295115	0.0298009	0.0195926	0.00342077	0.0323796
13	25	913.041	0.0290379	0.0414893	0.0320568	0.0325017	0.020798	0.00383632	0.0353094
13	26	921.476	0.0289769	0.0454108	0.0321105	0.0324865	0.0217594	0.00381188	0.0353704
13	27	1594.18	0.0433051	0.142428	0.0621053	0.0576944	0.0230106	0.0225364	0.0772564
13	28	1664.38	0.0430304	0.158175	0.0629636	0.0555428	0.0230259	0.0248793	0.0805676
13	29	1813.6	0.0608835	0.106172	0.0718943	0.0738689	0.0230106	0.0158138	0.085069
13	30	1725.51	0.0434882	0.154513	0.0626115	0.0571298	0.0230564	0.0240785	0.0761311
13	31	1611.21	0.0456092	0.172488	0.0616588	0.0559548	0.0230259	0.0221355	0.0720684
13	32	862.998	0.027985	0.0411383	0.0311125	0.0315404	0.0199741	0.00391135	0.0344244
13	33	1593.09	0.0440375	0.172549	0.0635861	0.0569314	0.0230106	0.024413	0.0811933
13	34	903.738	0.0287327	0.0515908	0.0317123	0.0320592	0.0222934	0.00357886	0.0347143
13	35	949.223	0.0302434	0.0436561	0.0335024	0.033814	0.0230106	0.00396985	0.0367895
13	36	919.545	0.0296941	0.051957	0.0326103	0.0328679	0.0221714	0.00374567	0.0357061
13	37	1659.38	0.0435645	0.194339	0.0617489	0.0555581	0.0230106	0.0240629	0.0756695
13	38	929.758	0.0300755	0.0488746	0.0334229	0.0336767	0.0230106	0.00412183	0.0368505
13	39	1704.75	0.0502174	0.137606	0.0647874	0.0616999	0.0230106	0.0197213	0.0770581
13	40	1624.37	0.0436103	0.169909	0.0621032	0.0562295	0.0230869	0.0241337	0.0757
13	41	1700.58	0.0422675	0.18912	0.0630826	0.0575723	0.0230411	0.0256857	0.0789731
13	42	1769.99	0.0477455	0.160662	0.0689195	0.0647898	0.0230564	0.0254857	0.0860151
13	43	858.077	0.0310979	0.0547189	0.0345206	0.0348669	0.0228275	0.00439861	0.0379339
13	44	1644.97	0.0472114	0.169436	0.0653805	0.0595102	0.0230106	0.0240003	0.0800183
13	45	886.82	0.0284581	0.0507362	0.0317152	0.0320134	0.0218967	0.00386088	0.0348821
13	46	1739.65	0.0447395	0.175036	0.0667017	0.059556	0.0230106	0.0281	0.0831006
13	47	1603.73	0.0481727	0.15877	0.0631688	0.059266	0.0230106	0.0219966	0.0711681
13	48	892.074	0.0293278	0.0650034	0.0324839	0.0328832	0.0216983	0.00404873	0.0355383
13	49	990.076	0.0301976	0.0549477	0.0334666	0.0339208	0.0223239	0.00398273	0.0368048
13	50	886.26	0.028275	0.0456245	0.0310293	0.0313726	0.020325	0.00364752	0.0340276
13	51	964.09	0.0311131	0.0479438	0.0344109	0.0346532	0.0230106	0.00402177	0.037644
13	52	1561.71	0.0435187	0.163561	0.0627873	0.0573587	0.0230564	0.0251393	0.0760967
13	53	906.643	0.0293202	0.0420539	0.0324056	0.0327153	0.0221256	0.00375681	0.0355535
13	54	1664.29	0.0438087	0.166445	0.0619778	0.0557565	0.0230106	0.0233969	0.0790723
13	55	999.692	0.0320745	0.0467536	0.0357352	0.0360266	0.0229953	0.00452655	0.039704
13	56	1622.35	0.0504768	0.139132	0.0629112	0.0642405	0.0230106	0.01621	0.0731975
13	57	1021.36	0.0323644	0.0475166	0.0365475	0.0369268	0.0230259	0.00493512	0.0409094
13	58	835.771	0.0333715	0.0639048	0.0374886	0.0377508	0.0217136	0.00556193	0.0419471
13	59	900.815	0.0288548	0.0524605	0.0321043	0.0324865	0.0220035	0.00393521	0.0354314
13	60	902.289	0.0288701	0.0875563	0.0318875	0.0323186	0.0197147	0.00397422	0.035111
13	61	962.952	0.0314641	0.0749218	0.0354144	0.0356756	0.0230564	0.00477319	0.0394903
13	62	1777.78	0.0481422	0.158587	0.0685079	0.0664378	0.0224002	0.0245802	0.084596
13	63	2945.97	0.0452888	0.174533	0.0630761	0.057023	0.0230106	0.0235078	0.080766
13	64	1006.42	0.031632	0.0504921	0.0354485	0.0357366	0.0230106	0.00463395	0.0396124
13	65	1617.02	0.0422522	0.172091	0.0601189	0.0569162	0.0230259	0.0219317	0.0737736
13	66	1723.94	0.0453956	0.192523	0.0666721	0.0576486	0.0230106	0.0289549	0.0821393
13	67	916.293	0.0306554	0.0452277	0.0340187	0.0342718	0.0230411	0.00412111	0.0374151
13	68	1558.28	0.0485847	0.132433	0.0603962	0.0592355	0.0230106	0.0175647	0.0678073
13	69	993.162	0.031632	0.0487526	0.0351861	0.0354925	0.022034	0.00436922	0.0386664
13	70	967.705	0.0305028	0.0437171	0.0338536	0.0342412	0.0226596	0.00416977	0.0373083
13	71	878.675	0.0295567	0.0484169	0.0324894	0.0328527	0.0216831	0.00378452	0.0356756
13	72	853.968	0.0282139	0.0497902	0.0309487	0.0312657	0.0208133	0.00355742	0.0339208
13	73	1691.67	0.048188	0.148638	0.0639211	0.0607462	0.0230411	0.0207921	0.0771496
13	74	858.194	0.0289464	0.0441901	0.0324484	0.0326848	0.0214847	0.00422716	0.0359808
13	75	1586.46	0.0413977	0.126726	0.0593158	0.0559548	0.0230106	0.020895	0.0766461
13	76	1746.1	0.0456703	0.188998	0.0685552	0.0621805	0.0230106	0.0282986	0.0848402
13	77	1600.68	0.0428206	0.158709	0.0628975	0.0563287	0.0230259	0.0235846	0.0821965
13	78	1655.48	0.0450752	0.169543	0.066464	0.0587015	0.0230106	0.0277863	0.0831159
13	79	1574.39	0.0427558	0.15845	0.0595907	0.0564889	0.022858	0.0203629	0.0729534
13	80	921.184	0.0293278	0.0427863	0.0326014	0.032929	0.0212711	0.00396067	0.0358892
13	81	803.537	0.0274968	0.0392767	0.0304255	0.0307622	0.0203098	0.00355235	0.0334478
13	82	864.213	0.0291142	0.0417945	0.0323991	0.0327306	0.0221561	0.00397237	0.0357824
13	83	892.622	0.0298924	0.0426337	0.0330026	0.033402	0.0221103	0.00388875	0.0363012
13	84	900.923	0.0286717	0.0408789	0.0316992	0.0320134	0.0218967	0.00368304	0.0348669
13	85	1528.58	0.0432593	0.188388	0.0604349	0.0557259	0.0230106	0.0219796	0.0731518
13	86	833.893	0.0286564	0.0421607	0.0319536	0.0322728	0.0214389	0.00391449	0.0352789
13	87	858.643	0.0293736	0.0430304	0.0328579	0.0331426	0.0220798	0.00418992	0.036408
13	88	880.907	0.0283207	0.0420081	0.0314071	0.0317845	0.0208286	0.00368339	0.0345312
13	89	1501.47	0.0408789	0.131579	0.0601503	0.055314	0.0230106	0.0221091	0.0791943
13	90	714.761	0.0261692	0.0375677	0.028926	0.0291905	0.0203708	0.00323948	0.0316472
13	91	842.822	0.0281834	0.041001	0.0312515	0.0315709	0.0216068	0.00364672	0.0343786
13	92	1718.63	0.0530861	0.0884413	0.0611613	0.0626535	0.0205997	0.0122445	0.0710307
13	93	772.792	0.0267491	0.0370184	0.0294184	0.0296941	0.0204929	0.00320895	0.0321508
13	94	834.538	0.0287938	0.041825	0.032239	0.0325933	0.0214542	0.00406792	0.0357366
13	95	860.748	0.0284886	0.054612	0.0314245	0.0317082	0.0209201	0.00363292	0.0344244
13	96	1221.01	0.0405127	0.0672618	0.0478154	0.0489509	0.0229496	0.00939438	0.0557717
13	97	867.416	0.0281682	0.0419165	0.0310913	0.0314641	0.0209049	0.00361357	0.0341497
13	98	1576.65	0.0519417	0.0877394	0.0592903	0.0608835	0.0230106	0.0112434	0.0679484
13	99	1590.9	0.0417487	0.150225	0.0607212	0.0528573	0.0230259	0.0247392	0.0771038
13	100	867.685	0.0280613	0.040528	0.0310164	0.0313878	0.0214389	0.00357053	0.0340429
13	101	1263.37	0.0332189	0.1196	0.0497644	0.0442359	0.0200504	0.020316	0.0641031
13	102	864.038	0.0281529	0.0406806	0.0311287	0.0314641	0.0217746	0.00359934	0.034165
13	103	1476.49	0.0415351	0.140841	0.0607758	0.0539406	0.0230106	0.0234283	0.0788434
13	104	1552.65	0.0413062	0.160067	0.059807	0.0529793	0.0200961	0.0234248	0.0750591
13	105	864.369	0.0285649	0.0412909	0.031604	0.0319371	0.0210575	0.00371444	0.0347601
13	106	887.019	0.0288243	0.0417029	0.032107	0.032517	0.0211795	0.00390641	0.035462
13	107	1660	0.054612	0.0915084	0.0623802	0.0637827	0.0223697	0.0124113	0.072694
13	108	1462.19	0.0355993	0.127291	0.0538479	0.0491951	0.021622	0.0210187	0.0700084
13	109	946.333	0.0290227	0.0495308	0.0318245	0.0322576	0.0213779	0.00363474	0.0348211
13	110	1547.05	0.0385748	0.129442	0.0578098	0.0516976	0.0226444	0.0230564	0.0764935
13	111	888.108	0.0290837	0.0421454	0.0320247	0.0323644	0.0217594	0.00368225	0.0351415
13	112	1566.21	0.0484169	0.12546	0.0601765	0.0583124	0.0218662	0.0169458	0.0680858
13	113	1217.73	0.0327001	0.0993973	0.0464233	0.0435187	0.0202792	0.0161576	0.0586709
13	114	861.027	0.0283513	0.0399939	0.031156	0.0315709	0.0213016	0.00348256	0.0340887
14	1	706.34	0.0263066	0.0415808	0.0289211	0.0291447	0.0196689	0.00315261	0.0316014
14	2	917.426	0.0299382	0.0460212	0.0332437	0.0337072	0.0214389	0.00414047	0.0366369
14	3	984.391	0.0309758	0.0467994	0.0346751	0.0349889	0.0228275	0.00447165	0.0382086
14	4	1693.35	0.0547951	0.103883	0.0643054	0.0662852	0.022385	0.0132432	0.0749218
14	5	1456.41	0.0420386	0.178286	0.062432	0.0545205	0.021912	0.0263432	0.0788281
14	6	840.364	0.028687	0.0411536	0.0316605	0.0319524	0.0211643	0.00379477	0.0348669
14	7	1021.31	0.0307469	0.0453346	0.0344141	0.0348821	0.0213779	0.00463997	0.0381781
14	8	1705.76	0.0427329	0.172412	0.0634441	0.0560006	0.0230106	0.0265854	0.0786374
14	9	1446.51	0.0364538	0.126833	0.0536479	0.0506447	0.0219425	0.0202733	0.0666209
14	10	947.739	0.0296941	0.0421302	0.0329408	0.0334173	0.0215763	0.00399359	0.0363165
14	11	899.444	0.0293126	0.0560769	0.0325296	0.0328832	0.0211948	0.00393131	0.0358129
14	12	935.724	0.0313573	0.0657054	0.0349555	0.0353246	0.0230411	0.0044561	0.038468
14	13	928.932	0.029572	0.0491035	0.0328791	0.0333257	0.0220035	0.00398605	0.0362249
14	14	1705.69	0.0464637	0.237369	0.069891	0.0580453	0.0222782	0.0374389	0.0784924
14	15	827.535	0.0279088	0.0406958	0.0309128	0.0312657	0.0203861	0.00368668	0.0340276
14	16	945.573	0.0300298	0.0561685	0.0335298	0.0340581	0.0217899	0.00449814	0.0371672
14	17	924.331	0.0291447	0.0558938	0.0323125	0.0326543	0.0210117	0.00394289	0.0355383
14	18	912.319	0.0290532	0.0492256	0.032176	0.0325322	0.0197604	0.00384785	0.0353399
14	19	1474.2	0.0398108	0.157702	0.0594724	0.0535897	0.0210117	0.0255102	0.0754711
14	20	1562.49	0.0426184	0.175097	0.0629552	0.0560159	0.0230259	0.0251492	0.0788281
14	21	1677.4	0.0416876	0.164721	0.0618305	0.0546197	0.0230106	0.0260016	0.0775578
14	22	1745.43	0.0555123	0.0964828	0.0656672	0.0668803	0.0230259	0.0144749	0.0778973
14	23	894.708	0.0292973	0.0537575	0.0324864	0.032929	0.0211032	0.00400848	0.0357824
14	24	1699.15	0.0485084	0.140429	0.0626945	0.0586709	0.0225071	0.0201008	0.0717479
14	25	876.172	0.0285649	0.041062	0.0316651	0.0320897	0.02121	0.00377007	0.0348974
14	26	920.842	0.0291752	0.0428321	0.0323943	0.0327611	0.021561	0.00402155	0.0357671
14	27	1676.88	0.0545815	0.0886549	0.0632784	0.065095	0.0226749	0.0122706	0.0734112
14	28	903.217	0.0286412	0.0432441	0.0316219	0.0321202	0.0211643	0.00373138	0.0348058
14	29	835.833	0.0286717	0.0590829	0.0318328	0.032105	0.0199435	0.00381897	0.0349279
14	30	1550.41	0.0400053	0.163668	0.0591962	0.0534524	0.0224918	0.0252741	0.0721942
14	31	957.136	0.0305943	0.0530556	0.0338198	0.0341344	0.0230106	0.00393471	0.0369726
14	32	932.288	0.0293736	0.0497902	0.0325009	0.0328679	0.021149	0.00380498	0.0357214
14	33	846.89	0.0281529	0.04065	0.0313211	0.0317693	0.0209049	0.0037809	0.0345159
14	34	1000.61	0.0302739	0.0580606	0.0334317	0.0337682	0.0229801	0.00390206	0.0366827
14	35	1804.8	0.0456397	0.160647	0.0661558	0.0593729	0.0230106	0.0253716	0.0832685
14	36	1669.92	0.0410315	0.192203	0.0619751	0.0527047	0.0227207	0.0270586	0.0787709
14	37	947.606	0.0295109	0.0450752	0.0328426	0.0334173	0.0217899	0.00412108	0.036286
14	38	1229.03	0.0414435	0.11043	0.0505838	0.0482948	0.0230259	0.0131823	0.0578775
14	39	1848.16	0.0579538	0.0996109	0.0673305	0.069276	0.0230106	0.0134893	0.0785687
14	40	1652.72	0.0406195	0.220539	0.061128	0.0556268	0.0222629	0.0255363	0.0764782
14	41	963.099	0.029221	0.0428473	0.0324472	0.0328222	0.0214542	0.00410389	0.0358892
14	42	981.846	0.0326696	0.0479744	0.0364904	0.0366827	0.0230106	0.004728	0.0406653
14	43	872.296	0.0280156	0.0413825	0.0314273	0.031693	0.0204166	0.00396286	0.0348363
14	44	1599.51	0.0493172	0.158953	0.06278	0.0635691	0.0230259	0.0169462	0.07364
14	45	992.979	0.0318151	0.0480964	0.0354066	0.0356603	0.0230106	0.00440359	0.0390631
14	46	1676.39	0.0545205	0.088304	0.0632552	0.0651255	0.0230106	0.0124576	0.0735332
14	47	999.785	0.0306859	0.0611582	0.0338417	0.0341802	0.0230259	0.00400795	0.0369573
14	48	983.021	0.0295567	0.0509651	0.0330316	0.0334325	0.0215152	0.00428585	0.0365301
14	49	796.478	0.0271	0.0390631	0.0301046	0.0303502	0.0195773	0.00360508	0.0331426
14	50	1711.53	0.0449531	0.176272	0.0658001	0.0578393	0.0228122	0.0266111	0.0826886
14	51	1020.09	0.0317845	0.0552071	0.0353978	0.0355688	0.0216068	0.00445253	0.0390173
14	52	926.213	0.0285801	0.0496681	0.0318428	0.032166	0.0212406	0.0039538	0.0351873
14	53	1795.16	0.0456397	0.19147	0.0681898	0.0569314	0.0230106	0.0324382	0.0802167
14	54	1689.51	0.047013	0.158373	0.0668343	0.0609445	0.0230106	0.0250135	0.0830892
14	55	949.96	0.029572	0.0626688	0.032849	0.0332036	0.0216373	0.00412205	0.0361677
14	56	929.034	0.0285344	0.0415198	0.031777	0.0321202	0.0202335	0.00403782	0.0351873
14	57	1708.95	0.05935	0.110658	0.0683745	0.0705882	0.0221866	0.0138535	0.0785992
14	58	1063.37	0.0327001	0.0483406	0.0370666	0.037232	0.0230106	0.00513905	0.0416419
14	59	1830.69	0.0466316	0.191165	0.0693259	0.0599756	0.0230259	0.0301739	0.0852903
14	60	1554.19	0.0420691	0.138155	0.0568384	0.0529335	0.0214694	0.021689	0.0648508
14	61	1026.17	0.0319371	0.0471962	0.0358263	0.03608	0.0230259	0.00473067	0.0400854
14	62	2698.81	0.0369268	0.241596	0.0579529	0.0516213	0.0230259	0.029031	0.069398
14	63	1656.29	0.0574655	0.0899214	0.0649017	0.0668345	0.0230259	0.0122846	0.0745708
14	64	925.822	0.03093	0.045655	0.034471	0.034699	0.0230564	0.00431918	0.0379797
14	65	1586.13	0.0431067	0.167193	0.0632427	0.0562142	0.0226596	0.0251806	0.0812695
14	66	1019.34	0.0331273	0.0478981	0.0371495	0.0372625	0.0230259	0.00497103	0.0415503
14	67	1639.78	0.0468605	0.179583	0.066701	0.0616465	0.0230106	0.0242881	0.0847334
14	68	847.063	0.0285344	0.0574044	0.0316517	0.0320897	0.0218051	0.00389086	0.0349279
14	69	1520.4	0.0419928	0.152911	0.0599976	0.0532998	0.0230106	0.0235649	0.0755436
14	70	1649.36	0.0567636	0.096025	0.0658271	0.0680552	0.0230106	0.0131518	0.0764935
14	71	961.321	0.0302892	0.0463264	0.0339222	0.0341955	0.0223392	0.00434862	0.0375067
14	72	917.283	0.0291905	0.0428626	0.0327519	0.0331121	0.0224002	0.00417825	0.036286
14	73	952.013	0.0290074	0.0428473	0.0321029	0.0324712	0.0221256	0.00381384	0.0353704
14	74	840.438	0.0280308	0.0512245	0.0313071	0.0315557	0.0205539	0.00389159	0.034638
14	75	903.425	0.028687	0.0945449	0.0317962	0.0320897	0.0216831	0.00396506	0.0349546
14	76	1676.05	0.0572366	0.0922713	0.0658357	0.06804	0.0230259	0.0130414	0.0762798
14	77	955.565	0.0286107	0.0475166	0.0318575	0.0321965	0.0211948	0.0039123	0.0351568
14	78	823.446	0.0274205	0.0389258	0.0304045	0.0307469	0.0205234	0.00356692	0.0334173
14	79	1624.42	0.0468299	0.156085	0.0661596	0.0605631	0.0223239	0.0250064	0.082517
14	80	895.164	0.0287785	0.0417182	0.0318813	0.0322423	0.0215763	0.0037589	0.0350805
14	81	1700.31	0.0576181	0.0972915	0.0661134	0.0676738	0.0229496	0.012889	0.0762493
14	82	899.973	0.0286107	0.0548867	0.0316168	0.0320134	0.021149	0.00379544	0.0346838
14	83	847.312	0.0277867	0.0410315	0.0312212	0.0316472	0.019852	0.00398012	0.0346075
14	84	1556.08	0.0449683	0.132708	0.0622706	0.0603037	0.0230411	0.0203381	0.0785534
14	85	685.268	0.0263523	0.0375372	0.0290984	0.0294194	0.0201419	0.0033238	0.0319066
14	86	1577.66	0.0434272	0.193088	0.0619101	0.0547189	0.0230106	0.0278213	0.0681315
14	87	1604.32	0.0456397	0.161212	0.0655197	0.0610666	0.0226444	0.0240077	0.0848249
14	88	877.566	0.0282902	0.0718395	0.0315682	0.0319982	0.0213321	0.00395361	0.0348516
14	89	795.883	0.026566	0.0379187	0.0294096	0.0297856	0.0205539	0.00338097	0.0322576
14	90	909.186	0.028809	0.0412909	0.0319832	0.0323339	0.0226139	0.00377442	0.0351415
14	91	1667.84	0.0558022	0.0959793	0.0646074	0.0661173	0.0230106	0.013215	0.0751202
14	92	1544.45	0.0407263	0.146746	0.0590882	0.0515755	0.0230259	0.0234777	0.075349
14	93	1582.52	0.0545357	0.0872816	0.0622869	0.0645609	0.0230106	0.0120884	0.0716411
14	94	917.017	0.028809	0.051194	0.0319886	0.0323033	0.0205997	0.00386965	0.0352483
14	95	838.496	0.0274968	0.0402991	0.0304775	0.0307469	0.0195773	0.00357799	0.0335241
14	96	855.821	0.028397	0.0460059	0.0313109	0.0317082	0.0213169	0.00363214	0.0343175
14	97	1654.07	0.0416114	0.165545	0.0612005	0.0551156	0.0230106	0.0244742	0.0761273
14	98	928.467	0.0288396	0.0435035	0.0319797	0.0324788	0.0209812	0.00383094	0.0352331
14	99	553.044	0.0251621	0.0330663	0.0270001	0.0271458	0.0202945	0.00228911	0.0288396
14	100	671.926	0.0256504	0.0359045	0.0282014	0.028397	0.0191806	0.00299507	0.0307012
14	101	928.244	0.0288396	0.0424659	0.0324561	0.0328069	0.0213321	0.00419931	0.0361334
14	102	900.917	0.0296788	0.05037	0.032849	0.0332799	0.0215457	0.00401289	0.0361486
14	103	1522.81	0.0392615	0.137224	0.0580405	0.0538949	0.0230259	0.02132	0.0778363
14	104	1666.84	0.0428931	0.15787	0.0626466	0.0550393	0.0230106	0.0251075	0.080766
14	105	1520.59	0.0389105	0.164279	0.0591439	0.0542763	0.0229038	0.0227991	0.0775311
14	106	1613.12	0.0437018	0.159075	0.0616447	0.0573129	0.0230106	0.0223052	0.0766613
14	107	1020.66	0.0305333	0.10985	0.0447168	0.0410468	0.0191501	0.0172776	0.0549325
14	108	871.711	0.0283055	0.0404822	0.0313509	0.031754	0.0214542	0.00372028	0.0345159
14	109	901.132	0.0286412	0.0425116	0.031841	0.0322271	0.0214694	0.003806	0.0351263
14	110	877.648	0.0297093	0.0435798	0.0329918	0.0335241	0.0202945	0.00419926	0.0365148
14	111	774.352	0.0268864	0.0378119	0.029507	0.0296483	0.0204623	0.00327802	0.0322881
15	1	591.361	0.0255131	0.0354314	0.0275001	0.0276646	0.0205081	0.00248619	0.0294652
15	2	816.954	0.027451	0.0402991	0.0307588	0.0311894	0.0201419	0.00400309	0.0341344
15	3	832.295	0.0285649	0.041413	0.0317731	0.0323033	0.0203098	0.00405965	0.0352026
15	4	867.088	0.0280156	0.0419165	0.0316294	0.0320287	0.0204929	0.00427098	0.0352941
15	5	845.43	0.0285039	0.0413672	0.0317544	0.0322728	0.0214084	0.00393202	0.035111
15	6	1546.65	0.0393988	0.147356	0.0584658	0.0508583	0.0222171	0.0246965	0.0737621
15	7	1493.77	0.0426337	0.160723	0.0600921	0.0572519	0.0230106	0.0216844	0.0744182
15	8	832.973	0.027924	0.0412757	0.031433	0.0319066	0.0196689	0.00416342	0.0349737
15	9	1444.48	0.0399481	0.165133	0.0556212	0.0533455	0.0217594	0.0206462	0.0674296
15	10	852.327	0.0276493	0.0419318	0.0313125	0.0315862	0.0208286	0.00428706	0.0350042
15	11	843.651	0.0283665	0.0416114	0.0315939	0.0320134	0.0202945	0.0040963	0.0351263
15	12	901.392	0.0285191	0.0419623	0.0316522	0.0321202	0.0206302	0.00396802	0.0349889
15	13	932.052	0.0284428	0.0416266	0.0317024	0.0321813	0.0194095	0.00398495	0.0350652
15	14	1630.44	0.0442779	0.180316	0.0660764	0.0582895	0.0222477	0.0281549	0.0834401
15	15	824.359	0.028275	0.0413367	0.0315242	0.0319982	0.0214847	0.00394704	0.0348516
15	16	916.727	0.02916	0.0619821	0.0324517	0.0328832	0.0209659	0.00416289	0.0358701
15	17	1504.11	0.0413519	0.135332	0.0578436	0.0549935	0.021912	0.0214304	0.0709239
15	18	845.523	0.0286412	0.0467231	0.0315411	0.0319524	0.0204318	0.00362627	0.0345769
15	19	922.856	0.0284581	0.0446479	0.0316741	0.0322271	0.0204929	0.00397001	0.0349737
15	20	1660.14	0.0536355	0.0925307	0.0621358	0.0641031	0.0226902	0.0132316	0.0726482
15	21	837.209	0.0295109	0.0506142	0.0332675	0.0336156	0.021622	0.00457204	0.0370184
15	22	846.432	0.0278325	0.0412451	0.0310037	0.0313115	0.0203098	0.00385265	0.0342565
15	23	890.468	0.0286412	0.041001	0.0317763	0.0322881	0.0213321	0.00383823	0.03505
15	24	1557.2	0.0427405	0.146578	0.0614376	0.0587625	0.0211185	0.0231923	0.0779202
15	25	1541.74	0.0421607	0.184665	0.062502	0.0537423	0.0230106	0.0281171	0.076009
15	26	1666.09	0.0537728	0.0890516	0.0621026	0.0641031	0.0225376	0.0132606	0.0728161
15	27	1647.59	0.0505074	0.12752	0.0624537	0.061738	0.0230259	0.0161833	0.0742962
15	28	1781.02	0.0564698	0.135912	0.0686091	0.068368	0.0230564	0.0170459	0.0798657
15	29	942.551	0.029633	0.0538643	0.0328335	0.0332189	0.0214084	0.00416326	0.0361028
15	30	872.487	0.0297398	0.0544289	0.0328645	0.0332647	0.0212406	0.00405655	0.0361486
15	31	852.03	0.0310063	0.0499275	0.0359188	0.0359197	0.0202487	0.00589396	0.0410315
15	32	933.721	0.0293431	0.0534218	0.0322084	0.0326085	0.0217136	0.00376799	0.0352636
15	33	1623.49	0.0420233	0.155245	0.0601671	0.0566415	0.021561	0.0223081	0.0761578
15	34	1568.81	0.0423285	0.222431	0.0626972	0.0532387	0.0230106	0.0316492	0.0721752
15	35	1520.73	0.0540017	0.090013	0.0624249	0.0641489	0.0230106	0.0126569	0.0728313
15	36	817.784	0.0282139	0.041474	0.0309837	0.031342	0.0204623	0.0035009	0.0339055
15	37	866.677	0.0288396	0.0481422	0.0317732	0.0321355	0.0204929	0.00370108	0.0348363
15	38	1591.06	0.0551461	0.0933394	0.0642491	0.0659648	0.0219425	0.0130476	0.0741894
15	39	893.588	0.0294804	0.0495766	0.0327502	0.0330816	0.0223392	0.00403213	0.0360113
15	40	1693.12	0.0573892	0.100069	0.0668504	0.0683604	0.0230106	0.0137633	0.0780385
15	41	940.04	0.0296788	0.0463874	0.0330837	0.033463	0.0210422	0.00410904	0.0364843
15	42	917.28	0.0290227	0.0416876	0.0320582	0.0324865	0.0205844	0.0037662	0.0352483
15	43	1610.07	0.0534524	0.0887007	0.062148	0.0637446	0.0230106	0.0126166	0.0725719
15	44	899.437	0.0292058	0.0493324	0.032411	0.0327764	0.0218662	0.00394446	0.0357366
15	45	1543.28	0.0415808	0.165667	0.0599425	0.0546578	0.0221256	0.0230238	0.0771801
15	46	1498.23	0.0389868	0.151324	0.0575423	0.052842	0.0212863	0.0223449	0.0732738
15	47	1555.92	0.0424811	0.140673	0.0613	0.0599527	0.0230411	0.0209842	0.0789807
15	48	911.599	0.0293889	0.0494392	0.0326504	0.0331121	0.0217746	0.00407396	0.0360418
15	49	913.233	0.0299992	0.0551461	0.0336378	0.0339818	0.02121	0.0044573	0.037171
15	50	1038.9	0.0321813	0.0588388	0.0358577	0.0361944	0.0227665	0.00470548	0.0399939
15	51	1429.61	0.0412604	0.127764	0.0583754	0.0539101	0.0230411	0.0207862	0.0752728
15	52	979.942	0.0316625	0.0537881	0.035473	0.0355535	0.0228733	0.00479272	0.0396124
15	53	884.564	0.0293736	0.043534	0.0327483	0.0331579	0.0218814	0.00411207	0.0361791
15	54	1724.48	0.04448	0.187976	0.0642386	0.0554818	0.0230106	0.0262515	0.0812352
15	55	874.527	0.0288243	0.0468605	0.031917	0.0323491	0.0213016	0.00373546	0.0350195
15	56	918.421	0.0292363	0.0604715	0.0327388	0.0330358	0.0217136	0.0041582	0.0361639
15	57	1556.48	0.0511788	0.113771	0.0613103	0.0615244	0.0230106	0.0140501	0.0708476
15	58	902.256	0.0291295	0.0501259	0.0322119	0.0325322	0.0212558	0.00383899	0.0354009
15	59	895.306	0.0301671	0.0477302	0.0337215	0.0340124	0.022797	0.00436776	0.0372473
15	60	1826.16	0.0590677	0.0999771	0.0690107	0.0713664	0.0230411	0.0138478	0.080293
15	61	1927.69	0.0494698	0.192828	0.0738294	0.0665446	0.0230106	0.0310791	0.0921645
15	62	869.129	0.0288548	0.0438239	0.0320878	0.032517	0.0208743	0.00385852	0.0353704
15	63	1513.45	0.043122	0.137087	0.059922	0.0568704	0.0224918	0.0207137	0.0732433
15	64	985.439	0.0313726	0.0533455	0.0351666	0.0354009	0.0230106	0.00453306	0.0387427
15	65	1632.33	0.0535134	0.0953536	0.0624814	0.0633707	0.0228122	0.0124113	0.0725414
15	66	1625.67	0.0436408	0.147799	0.0612419	0.0574655	0.0230869	0.0217944	0.0764134
15	67	733.501	0.0280461	0.0514076	0.0314012	0.0316014	0.0215152	0.00406948	0.0347906
15	68	1696.22	0.0503243	0.149966	0.065029	0.0608682	0.0230106	0.0209034	0.0743267
15	69	1716.95	0.0454452	0.188403	0.0654002	0.0598611	0.0230564	0.025539	0.0800031
15	70	1844.37	0.0492561	0.160204	0.0723479	0.0668498	0.0230259	0.0266382	0.0946784
15	71	1572.67	0.0493172	0.116411	0.0613604	0.0603952	0.0230259	0.0162874	0.0739147
15	72	1729	0.0451972	0.178027	0.0686439	0.0566262	0.0230106	0.0315777	0.0849775
15	73	1754.33	0.047776	0.200504	0.0697325	0.06598	0.0230106	0.0263032	0.0864424
15	74	1632.27	0.0435492	0.162829	0.062753	0.0580911	0.0230106	0.0229945	0.0802319
15	75	934.021	0.0291905	0.0492256	0.0325114	0.0328679	0.0218204	0.00406016	0.0359045
15	76	1556.82	0.0427558	0.157488	0.0608301	0.0571145	0.0230106	0.0217552	0.0767948
15	77	806.78	0.0272526	0.0393378	0.0301555	0.0305028	0.0205997	0.00351844	0.0331121
15	78	927.267	0.0288548	0.0522164	0.0316042	0.0319371	0.0207218	0.00356088	0.0345159
15	79	1616.24	0.0437972	0.142275	0.0630924	0.0579919	0.0230106	0.0228247	0.0810712
15	80	1831.83	0.0592355	0.0964218	0.0686903	0.0701457	0.0230259	0.0137384	0.0802014
15	81	1710.38	0.0447852	0.149767	0.0665802	0.0601434	0.0230564	0.0256449	0.0868696
15	82	1726.72	0.0579995	0.101427	0.0678424	0.068574	0.0230869	0.0142712	0.0796063
15	83	1433.9	0.0507362	0.0876173	0.0586461	0.0605325	0.0230106	0.0122587	0.0688945
15	84	893.855	0.0291752	0.0424811	0.0324826	0.0328374	0.0217288	0.00411777	0.0359503
15	85	1672.37	0.0313878	0.0561074	0.0341341	0.0348974	0.022034	0.00373966	0.0370794
15	86	1589.48	0.0302281	0.0580606	0.0336326	0.0345464	0.0211948	0.00426075	0.0371405
15	87	1473.08	0.0475776	0.0810407	0.0552834	0.0569619	0.0225223	0.0114806	0.0647288
15	88	1664.6	0.0534676	0.0915847	0.0618649	0.0633707	0.0227359	0.0119735	0.07187
15	89	886.658	0.02916	0.0524147	0.0323515	0.0326543	0.0224308	0.00387295	0.0356298
15	90	900.852	0.0290684	0.0503395	0.0324234	0.0328222	0.0217594	0.00400011	0.0358587
15	91	914.295	0.0293889	0.0474098	0.032774	0.0330968	0.0216068	0.00407417	0.0361944
15	92	868.217	0.0284123	0.0454719	0.0318764	0.0323033	0.0206607	0.00413563	0.0353399
15	93	1649.92	0.0441749	0.149477	0.0635539	0.0611582	0.0230106	0.0225353	0.0790227
15	94	841.374	0.0281071	0.0418402	0.0315736	0.0318914	0.0216373	0.00408111	0.0350347
15	95	1588.6	0.0424353	0.168429	0.0610177	0.0557565	0.0230106	0.023399	0.0761578
15	96	1580.48	0.0460059	0.131899	0.0612425	0.0562448	0.0222019	0.0208568	0.0750286
15	97	1293.03	0.0356451	0.113573	0.0506692	0.0480964	0.0212558	0.0176917	0.063447
15	98	1459.54	0.0374151	0.140764	0.0540288	0.0496529	0.0215763	0.0205569	0.0684367
15	99	845.732	0.0292363	0.0472419	0.0326878	0.0330663	0.0207523	0.0041675	0.0362097
15	100	885.05	0.0285954	0.041413	0.0318684	0.0323186	0.0201572	0.00386852	0.0351873
15	101	869.373	0.0285344	0.0432288	0.0317382	0.0321355	0.0215	0.00383585	0.0350042
15	102	893.894	0.0289616	0.0475166	0.0321602	0.0324712	0.0221256	0.00395764	0.0355077
15	103	890.739	0.0285954	0.0506142	0.0325491	0.0328222	0.0216678	0.00459573	0.0364233
15	104	902.441	0.0283818	0.0448768	0.0316679	0.0322576	0.0200046	0.00403945	0.0348821
15	105	1578.87	0.0527047	0.0964981	0.0619506	0.0630503	0.0230106	0.0127253	0.0725414
15	106	1571.15	0.0514076	0.0853132	0.0598009	0.060914	0.0230564	0.011973	0.0697795
15	107	569.682	0.0254978	0.0348211	0.0275662	0.0277714	0.0202792	0.00254908	0.0296483
15	108	738.915	0.0267185	0.0415351	0.0292883	0.0295872	0.020325	0.00320769	0.0319677
15	109	1503.49	0.0487831	0.0811017	0.056374	0.0579843	0.0230259	0.0116382	0.0659495
15	110	868.637	0.0286107	0.0415961	0.0320046	0.0322271	0.0213474	0.00404667	0.0354772
16	1	756.19	0.0275731	0.0407111	0.0306398	0.0309758	0.0204471	0.0038929	0.0338598
16	2	860.062	0.028809	0.0780499	0.0321374	0.0324407	0.020676	0.00427278	0.0354467
16	3	596.851	0.0256352	0.0362249	0.0280357	0.0281071	0.0197147	0.00290527	0.0304417
16	4	1593.16	0.0480507	0.160525	0.0644665	0.0610819	0.0227512	0.0229468	0.0760052
16	5	1600.89	0.043122	0.182559	0.0621776	0.052079	0.0222019	0.0283614	0.0743915
16	6	1630.46	0.049836	0.0876173	0.0588997	0.0602579	0.0224308	0.0125409	0.0687266
16	7	846.818	0.0293889	0.0427253	0.0324526	0.033051	0.0211643	0.00410825	0.0358282
16	8	1656.3	0.0435492	0.16199	0.0613831	0.0572061	0.0227817	0.0243717	0.0732586
16	9	1664.65	0.0418708	0.183917	0.062251	0.0561227	0.0230106	0.0252593	0.0788968
16	10	1555.49	0.0531739	0.0884413	0.0621922	0.0639506	0.0227359	0.0131764	0.0731212
16	11	1653.51	0.0432517	0.157092	0.0627041	0.0562905	0.0221561	0.0250005	0.0799725
16	12	1577.24	0.0295262	0.0431067	0.0328858	0.033814	0.0206302	0.0043879	0.0365301
16	13	1596.98	0.0452583	0.134417	0.063199	0.0591592	0.0229038	0.02198	0.0796483
16	14	875.922	0.0289006	0.0440681	0.0321475	0.0325628	0.0215763	0.00395552	0.0354467
16	15	902.395	0.0293431	0.058793	0.0325363	0.0328832	0.0212711	0.0040711	0.0357977
16	16	681.764	0.0265965	0.0373846	0.0292026	0.0295567	0.0196689	0.0032608	0.0319066
16	17	1606.42	0.0420691	0.155489	0.0603351	0.0539559	0.0220493	0.0235626	0.074815
16	18	1591.57	0.0535592	0.0853437	0.0616434	0.0631723	0.0230106	0.012414	0.0719768
16	19	1640.08	0.0437324	0.172824	0.0611833	0.0542	0.0226749	0.0265583	0.0680858
16	20	1572.84	0.0454719	0.137606	0.0639393	0.0603037	0.0230259	0.0225254	0.0792096
16	21	1685.73	0.0437018	0.157824	0.0625943	0.055314	0.0213626	0.0265326	0.0749828
16	22	905.729	0.0293126	0.0419471	0.0323486	0.0327459	0.0210727	0.00378633	0.0355535
16	23	1511.35	0.0514534	0.086717	0.0602995	0.0619669	0.022858	0.0128127	0.0708782
16	24	813.678	0.0276303	0.0413519	0.0310055	0.0313115	0.0197452	0.00404189	0.0344396
16	25	3151.91	0.0476692	0.198398	0.068578	0.0614633	0.0230106	0.0280105	0.0847028
16	26	1636.07	0.0429999	0.186007	0.0626462	0.0556039	0.0225986	0.0251943	0.0797894
16	27	707.37	0.0263523	0.0369726	0.0289206	0.0291752	0.0198978	0.00318509	0.0315557
16	28	1641.45	0.0506294	0.144121	0.0628452	0.0610513	0.0230106	0.0190885	0.0716259
16	29	1583.19	0.0541238	0.0886549	0.0629076	0.0643778	0.0230106	0.012418	0.0733539
16	30	947.378	0.029572	0.0527352	0.0328119	0.0332036	0.0219577	0.00398659	0.0360723
16	31	909.332	0.0288853	0.0457618	0.0319906	0.0324102	0.0215763	0.00382505	0.0351568
16	32	887.29	0.0292363	0.0433661	0.0323888	0.0326085	0.0208896	0.00393997	0.0356756
16	33	1597.15	0.0419013	0.138079	0.0614879	0.0562142	0.0230564	0.0233249	0.0798657
16	34	1553.1	0.0441444	0.13463	0.0622559	0.0577249	0.0212863	0.0232699	0.0789349
16	35	1533.28	0.0489052	0.120439	0.0617411	0.0601358	0.0225681	0.0172987	0.0746166
16	36	870.178	0.0290532	0.0522469	0.0321348	0.0325628	0.0212711	0.00384182	0.035359
16	37	1774.94	0.0575113	0.0937209	0.0666821	0.0681163	0.0230106	0.0135612	0.0781262
16	38	1557.2	0.0454414	0.148623	0.063593	0.057908	0.0230411	0.0230675	0.082002
16	39	982.549	0.0311894	0.0647746	0.0344331	0.0347066	0.0225986	0.00426916	0.0375525
16	40	1496.36	0.0409247	0.164233	0.0595328	0.0518502	0.0229343	0.0247794	0.074464
16	41	943.76	0.0305943	0.0509041	0.0339396	0.0341497	0.0224308	0.0042766	0.0373846
16	42	1500.69	0.0420844	0.156435	0.0599459	0.0542611	0.0230106	0.0229407	0.0735256
16	43	873.599	0.0289464	0.0444495	0.0321791	0.032578	0.0211185	0.00389105	0.0355077
16	44	1594.34	0.0398108	0.197711	0.0591199	0.0523384	0.0230106	0.0258259	0.0727092
16	45	1635.94	0.0463264	0.152956	0.0660293	0.0602274	0.0230106	0.0251025	0.0827649
16	46	925.28	0.029984	0.0669261	0.0331333	0.0334936	0.021912	0.00394193	0.0363012
16	47	1647.55	0.0412451	0.187976	0.0591029	0.0527657	0.022385	0.0234964	0.0744335
16	48	819.878	0.0287175	0.0420539	0.0318152	0.0322118	0.0216526	0.003838	0.0350652
16	49	1770.15	0.0480049	0.168505	0.0678035	0.0649424	0.0230106	0.0236967	0.0842451
16	50	1547.12	0.0421759	0.132296	0.0587768	0.0559548	0.0230106	0.0200635	0.0727092
16	51	1885.6	0.0604715	0.109255	0.0710582	0.0726024	0.0230106	0.0153088	0.0833753
16	52	1676.8	0.0427405	0.180682	0.0623463	0.054612	0.0230106	0.0255339	0.0780652
16	53	823.287	0.0275578	0.0448768	0.0303583	0.0306859	0.0206607	0.00353794	0.0332647
16	54	1065.07	0.0333867	0.0657816	0.0368142	0.0370642	0.0230106	0.00465231	0.0406348
16	55	1603.5	0.0440375	0.150057	0.0617132	0.0564736	0.0224765	0.0230291	0.0760662
16	56	926.157	0.030808	0.0489052	0.033831	0.0342107	0.0211795	0.00422986	0.0371557
16	57	943.336	0.0284428	0.0410468	0.0315877	0.0319982	0.0209812	0.00385798	0.0348211
16	58	989.539	0.031281	0.0441138	0.0347	0.0350652	0.0229343	0.00423569	0.0381323
16	59	894.129	0.0290532	0.0421912	0.0322918	0.0327001	0.0209812	0.00393799	0.0356603
16	60	1059.49	0.0340887	0.0540475	0.0380413	0.0382239	0.0215	0.00483344	0.0422065
16	61	877.145	0.0287633	0.0433204	0.0319124	0.0322728	0.0207828	0.00380365	0.0351263
16	62	2040.08	0.0569009	0.193393	0.0784316	0.0723278	0.0222629	0.0293638	0.0975357
16	63	1845.97	0.0616465	0.10309	0.070508	0.0726177	0.0214542	0.0151708	0.0823072
16	64	944.601	0.0299382	0.0427863	0.0331079	0.0334325	0.0229648	0.00391942	0.0363928
16	65	1472.1	0.0476692	0.0810712	0.055505	0.0575265	0.0211337	0.0116534	0.0648966
16	66	930.591	0.0301518	0.0440375	0.0336391	0.0340276	0.0216068	0.00431454	0.0372168
16	67	1690.51	0.0493324	0.185901	0.0658451	0.0589761	0.0229496	0.0267156	0.073991
16	68	1051.07	0.033051	0.0488899	0.0370449	0.0372625	0.0230106	0.00481673	0.0412757
16	69	1562.12	0.0432326	0.180835	0.0625323	0.0557336	0.0212253	0.0253023	0.0756352
16	70	934.194	0.0287327	0.0416266	0.0319568	0.0324102	0.0213626	0.00385651	0.0352331
16	71	1206.28	0.0366674	0.0530861	0.0411404	0.0419776	0.0215915	0.0055295	0.0458076
16	72	1574.08	0.0425116	0.128771	0.0613342	0.0576333	0.0230106	0.0225218	0.0777295
16	73	1891.98	0.0616922	0.0999466	0.0699516	0.0723125	0.0211643	0.0141012	0.0807813
16	74	1502.94	0.049073	0.0847334	0.0569146	0.0582589	0.0220645	0.0117455	0.066041
16	75	983.541	0.0312505	0.045304	0.0344088	0.0346838	0.0230259	0.00402061	0.037644
16	76	1111.54	0.034638	0.0568093	0.0377599	0.0380713	0.021149	0.00458744	0.0415045
16	77	1741.52	0.0393378	0.132326	0.0463418	0.0445411	0.0206302	0.0141913	0.048661
16	78	1063.71	0.0336461	0.0513771	0.0378652	0.0379492	0.0222477	0.0051289	0.042359
16	79	956.13	0.0302739	0.0554208	0.0334265	0.0339208	0.0220798	0.00408072	0.0366827
16	80	1549.38	0.0434577	0.139315	0.0616107	0.0596017	0.0230106	0.0220042	0.0752728
16	81	1016.79	0.0378119	0.0565957	0.0424724	0.0436408	0.0210575	0.00608414	0.047425
16	82	1634.84	0.0522469	0.107469	0.0613033	0.0619821	0.0230411	0.0126944	0.0712444
16	83	1583.08	0.0521248	0.19498	0.0713837	0.0659419	0.0211185	0.0267789	0.0896315
16	84	1863.62	0.0594492	0.0977951	0.0674636	0.0701305	0.0205844	0.0148095	0.0785229
16	85	1446.13	0.0401465	0.159442	0.0580591	0.0514992	0.0213016	0.0236033	0.0726787
16	86	1609.98	0.0476081	0.186709	0.0652158	0.06009	0.0204166	0.024271	0.0788128
16	87	1725.08	0.0456855	0.1673	0.0647625	0.060441	0.0230106	0.0229979	0.0828565
16	88	1081.66	0.0328832	0.0699321	0.0365684	0.0366674	0.0230259	0.00469585	0.0406806
16	89	1613.18	0.0463188	0.182177	0.062677	0.059144	0.0230106	0.0219807	0.0762798
16	90	1198.86	0.0356603	0.112657	0.0394896	0.0403906	0.0205844	0.00545336	0.0436866
16	91	932.074	0.0288701	0.0955673	0.0319916	0.0323949	0.0213016	0.00392497	0.0350958
16	92	917.401	0.0292668	0.0477913	0.032385	0.0328832	0.0217899	0.00389671	0.0356603
16	93	1063.93	0.0334936	0.0607004	0.0368307	0.0371099	0.0209201	0.00479796	0.04094
16	94	1778.04	0.0484169	0.143725	0.066796	0.0619821	0.0208896	0.0237757	0.0851911
16	95	766.35	0.0284428	0.0417945	0.0310892	0.0313573	0.0210575	0.00362835	0.0340734
16	96	940.304	0.0303655	0.0573434	0.0336291	0.0340276	0.0209201	0.0041844	0.0370336
16	97	1463.41	0.0303655	0.049485	0.034074	0.0345006	0.0205539	0.00473556	0.0374304
16	98	1737.59	0.0406348	0.152026	0.0586292	0.0547494	0.0217136	0.0225504	0.0719615
16	99	3232.89	0.050309	0.206516	0.0701977	0.0652018	0.0220493	0.024963	0.0894331
16	100	1566	0.0413519	0.152361	0.0599495	0.0534371	0.0220035	0.0249386	0.0731212
16	101	996.124	0.0317388	0.0458534	0.0351119	0.0355993	0.0214084	0.00478999	0.03888
16	102	1060.6	0.0327916	0.047013	0.0364266	0.0366827	0.0216983	0.00490252	0.0407721
16	103	863.157	0.0279545	0.0408637	0.0307831	0.0314031	0.0206912	0.0037402	0.0337377
16	104	860.661	0.0287022	0.0405737	0.0316676	0.0321355	0.0217441	0.0037474	0.0348363
16	105	613.145	0.0254368	0.0347601	0.0275906	0.0277562	0.0195468	0.00264084	0.0297551
16	106	1488.96	0.0487526	0.117159	0.0625509	0.0615549	0.0230106	0.0180538	0.0765698
16	107	1497.38	0.0402991	0.155123	0.059545	0.0525292	0.0225071	0.0238315	0.0770123
16	108	732.56	0.0264744	0.0369116	0.0291996	0.0294499	0.0208438	0.00325356	0.0319524
16	109	865.419	0.0282902	0.0451057	0.0316644	0.0320134	0.020737	0.00409428	0.0351873
16	110	883.95	0.0281376	0.0408179	0.031192	0.0316167	0.0202029	0.00381057	0.0344244
16	111	547.427	0.0250706	0.0339513	0.0269761	0.0271305	0.0196841	0.00232465	0.0288396
17	1	864.596	0.0279088	0.0413825	0.0312433	0.0317693	0.0212406	0.00408088	0.0346685
17	2	759.776	0.0264744	0.0366217	0.0290323	0.0293889	0.0201877	0.00318743	0.031693
17	3	873.588	0.0287785	0.0480507	0.0323683	0.0328069	0.0205692	0.00448401	0.0360876
17	4	530.262	0.0253758	0.0346075	0.0273683	0.0274662	0.0191348	0.00248824	0.0293889
17	5	1615.8	0.0518807	0.0935225	0.061505	0.0628519	0.0227512	0.014622	0.073476
17	6	1620.65	0.0515297	0.0885786	0.0605829	0.0629206	0.0229191	0.0142616	0.0719005
17	7	867.711	0.028275	0.0447547	0.0315199	0.0319982	0.0206302	0.00397157	0.0348363
17	8	856.369	0.0278325	0.0432441	0.0317338	0.0320897	0.0210117	0.00460219	0.0356451
17	9	1388.27	0.041474	0.132174	0.0544485	0.0513771	0.0213169	0.018472	0.0625772
17	10	841.493	0.0286717	0.0434424	0.0317869	0.0323491	0.0217899	0.0038036	0.0350042
17	11	852.899	0.0281071	0.0410315	0.031275	0.0317388	0.021622	0.00386077	0.0345617
17	12	851.609	0.0281834	0.0403449	0.0310104	0.0314946	0.0214847	0.00357443	0.0339666
17	13	1541.95	0.0396277	0.170092	0.0591715	0.0526589	0.0213321	0.0259185	0.0726825
17	14	1251.5	0.0401923	0.148302	0.0528105	0.0500954	0.0211948	0.0191514	0.0590219
17	15	873.43	0.0278477	0.0404822	0.0309453	0.0314488	0.0204318	0.00371374	0.0340581
17	16	1595.12	0.0421607	0.197421	0.0584291	0.0522621	0.0219425	0.0267279	0.0641794
17	17	1668.37	0.0404212	0.213092	0.0603409	0.0515373	0.0213931	0.0300826	0.0698215
17	18	855.1	0.0282902	0.0413367	0.0314838	0.0319677	0.0205997	0.0038649	0.0347601
17	19	787.467	0.0276646	0.038529	0.0303924	0.0308385	0.0211948	0.00343082	0.0332189
17	20	830.685	0.0289921	0.041001	0.0319789	0.0324712	0.0215915	0.00384174	0.0352178
17	21	840.452	0.0280613	0.040589	0.0312389	0.0316167	0.0210269	0.00388904	0.0345464
17	22	874.981	0.0281071	0.0407111	0.0312582	0.0318914	0.0206455	0.00379203	0.0344396
17	23	1629.26	0.0397192	0.215579	0.0596865	0.0518807	0.0212558	0.0293581	0.0665103
17	24	864.64	0.028397	0.0425727	0.0317544	0.032105	0.0214389	0.00406351	0.0351415
17	25	914.599	0.0287175	0.043473	0.0323054	0.0327764	0.0216983	0.00426119	0.0359808
17	26	693.886	0.0264744	0.0370336	0.02915	0.0294652	0.0195621	0.00325897	0.0318914
17	27	1561.59	0.038819	0.158862	0.0586448	0.0544289	0.022034	0.0237447	0.0749065
17	28	801.654	0.0283207	0.0474708	0.0314596	0.0319066	0.020676	0.00390039	0.0347143
17	29	865.264	0.0284466	0.0408026	0.0314722	0.0318608	0.0208896	0.00371387	0.034638
17	30	1652.37	0.0412451	0.186465	0.0617639	0.0532006	0.0218509	0.0285704	0.0738384
17	31	1580.35	0.0413214	0.167193	0.059461	0.0540169	0.0219272	0.0232712	0.0759747
17	32	1563.22	0.0483253	0.0850538	0.0569522	0.059205	0.0224002	0.0133071	0.0674754
17	33	905.569	0.0280308	0.0412909	0.0309713	0.0314336	0.0211185	0.00364872	0.0340429
17	34	879.861	0.0286107	0.0421454	0.0317708	0.0323644	0.0209201	0.00388485	0.03505
17	35	1696.41	0.0533913	0.0876478	0.0616564	0.063447	0.0218509	0.0128618	0.0720226
17	36	826.98	0.0284276	0.0433204	0.0315918	0.0321202	0.0208743	0.00388757	0.0348821
17	37	1673.16	0.045304	0.160861	0.0613597	0.0555886	0.0230259	0.0225276	0.0745861
17	38	1442.74	0.0390631	0.170489	0.0576059	0.0514992	0.0195315	0.0252404	0.0695048
17	39	808.919	0.0279545	0.0403296	0.0309895	0.0314183	0.0186618	0.0037775	0.034165
17	40	1672.68	0.0430762	0.157122	0.06092	0.0569924	0.0224918	0.0244202	0.0719768
17	41	1720.83	0.0455329	0.201862	0.0635861	0.0563973	0.0230259	0.0293186	0.0699016
17	42	1632.43	0.0458991	0.14696	0.0635238	0.0589914	0.0230106	0.0223942	0.0786831
17	43	1629.69	0.0514534	0.0906691	0.0602162	0.0615396	0.0230106	0.0134943	0.0709392
17	44	814.978	0.0279088	0.0413977	0.0313297	0.0317388	0.0198978	0.00409549	0.0347753
17	45	1660.72	0.0408331	0.164874	0.0608388	0.0568704	0.0227817	0.0255583	0.0752117
17	46	926.905	0.029572	0.0625467	0.033257	0.0336004	0.0217441	0.00466114	0.0367437
17	47	941.728	0.0291295	0.0411994	0.0321124	0.0326238	0.0214389	0.00378887	0.0353094
17	48	914.059	0.0299229	0.0565194	0.0334404	0.033814	0.0216526	0.00433281	0.0370413
17	49	918.402	0.028397	0.0412299	0.0316319	0.0322118	0.0201724	0.00398967	0.03505
17	50	767.99	0.0270848	0.0482795	0.0298434	0.0302434	0.0204318	0.0033962	0.0326238
17	51	865.458	0.0294041	0.0464485	0.0327366	0.0332647	0.0209049	0.004272	0.0361791
17	52	844.97	0.0276036	0.0386206	0.0305916	0.0311284	0.0208286	0.00359084	0.0336309
17	53	1764.85	0.0443122	0.185	0.0666684	0.0570535	0.0230106	0.0297525	0.0862898
17	54	826.976	0.0277867	0.0411383	0.0311525	0.0316167	0.0206607	0.00404038	0.0345922
17	55	929.73	0.029633	0.0523842	0.0330078	0.0334936	0.0211948	0.00418247	0.0364538
17	56	845.254	0.0281682	0.04065	0.0313522	0.0317998	0.019913	0.00385941	0.034638
17	57	883.73	0.0273594	0.0406653	0.0306287	0.0310063	0.0210727	0.00379846	0.0339055
17	58	1040.66	0.0307164	0.0697948	0.0346944	0.0349737	0.0218509	0.00548804	0.0383307
17	59	1702.62	0.0579538	0.0972305	0.0681482	0.0701457	0.0230106	0.0145224	0.0799725
17	60	808.46	0.0268101	0.038941	0.0299874	0.0303197	0.0196689	0.00374563	0.0331884
17	61	847.042	0.0281491	0.0412757	0.0312204	0.0315862	0.0209201	0.00375934	0.0343824
17	62	932.71	0.0282444	0.0415503	0.031671	0.0322271	0.0211032	0.00404654	0.0351415
17	63	1553.22	0.0405737	0.159243	0.0579971	0.0527657	0.021973	0.0230604	0.0718509
17	64	982.031	0.0290227	0.0438544	0.0329563	0.0334936	0.0219577	0.00459112	0.0369192
17	65	976.895	0.0307927	0.056611	0.0348767	0.0353246	0.0222171	0.004904	0.0390478
17	66	879.029	0.0279393	0.0402533	0.0311414	0.0315862	0.0203555	0.00385502	0.0344396
17	67	1718.89	0.0454108	0.219394	0.065097	0.0584726	0.0224155	0.0280599	0.0769207
17	68	850.115	0.0282444	0.0445869	0.0317195	0.032166	0.0210727	0.00414931	0.0352483
17	69	1611.73	0.0401465	0.200198	0.0594579	0.0519722	0.0209354	0.0270084	0.0717479
17	70	917.047	0.0295109	0.0460212	0.0336099	0.0340429	0.0203861	0.00481312	0.0376745
17	71	946.87	0.0302739	0.0534524	0.0339344	0.0343938	0.0213169	0.00442907	0.0375677
17	72	1485.65	0.0446784	0.168093	0.0626591	0.0582437	0.0221256	0.0228438	0.0790723
17	73	1478.41	0.0426528	0.0778668	0.0515899	0.0547494	0.0116274	0.0142869	0.0629587
17	74	1558.47	0.0435035	0.162478	0.0575486	0.0535744	0.0230106	0.0226092	0.0638285
17	75	862.85	0.0285649	0.0431373	0.0325003	0.0328832	0.0217441	0.00460617	0.036408
17	76	838.822	0.0283055	0.0424353	0.0315667	0.0319524	0.0207065	0.00402544	0.0349737
17	77	990.471	0.0297704	0.0445563	0.0336929	0.0341497	0.0211643	0.00462944	0.0375982
17	78	1664.93	0.0496223	0.140856	0.0638224	0.0596475	0.0230259	0.021457	0.07047
17	79	880.887	0.0281224	0.047303	0.0311389	0.0314565	0.0203555	0.00376334	0.0343328
17	80	850.605	0.0280308	0.0402838	0.0311383	0.0315557	0.0212558	0.00381435	0.0343786
17	81	875.936	0.0284428	0.0455634	0.0313652	0.0317388	0.0214237	0.00371069	0.0344396
17	82	926.192	0.0291295	0.0435798	0.0328658	0.0332494	0.0217136	0.00449471	0.0366979
17	83	1600.32	0.0445411	0.175525	0.0654715	0.0573587	0.0230106	0.0273686	0.0829023
17	84	1604.32	0.0529335	0.0902724	0.0612779	0.0628977	0.0230106	0.0125186	0.0714733
17	85	770.857	0.0271	0.0401312	0.0299315	0.0302892	0.0205997	0.00346831	0.0328527
17	86	1543.51	0.0513008	0.0868544	0.0598283	0.0610208	0.0230106	0.012764	0.0701457
17	87	880.364	0.0287938	0.057969	0.032019	0.0325933	0.0204776	0.00415661	0.0352789
17	88	865.933	0.0281224	0.0506905	0.03163	0.0320134	0.0211032	0.00420799	0.0352026
17	89	849.634	0.0287175	0.0423133	0.0318657	0.0322576	0.0211795	0.00391034	0.0350805
17	90	1598.28	0.0432288	0.192142	0.062828	0.0554665	0.0230869	0.0286799	0.0744335
17	91	1488.03	0.0523537	0.132174	0.0617081	0.0628672	0.0218051	0.0155516	0.0730297
17	92	1542.64	0.0398184	0.154437	0.0577724	0.0543526	0.0209354	0.0229838	0.0708934
17	93	875.758	0.027985	0.0459602	0.031527	0.0320287	0.0208133	0.0041155	0.0350195
17	94	924.972	0.0284886	0.0408637	0.0315238	0.0321355	0.0209812	0.00377731	0.0346838
17	95	1650.02	0.0396124	0.155245	0.0593148	0.0516976	0.0213626	0.0261823	0.0752804
17	96	1493.29	0.0376287	0.178393	0.0558908	0.0509194	0.0218814	0.023256	0.0681468
17	97	839.956	0.027924	0.0492256	0.0311072	0.0315251	0.0204166	0.00382744	0.0342718
17	98	857.131	0.0280308	0.0446479	0.0312548	0.0317845	0.021561	0.00382918	0.0345464
17	99	710.423	0.0265354	0.0375372	0.0291983	0.0294804	0.0204471	0.00324967	0.0319371
17	100	859.008	0.0277714	0.0409247	0.0311754	0.0316472	0.0196536	0.00402004	0.0346075
17	101	1649.42	0.0407263	0.165225	0.0597788	0.0522469	0.0220035	0.0256022	0.0746777
17	102	821.707	0.0269932	0.0406043	0.0305467	0.030869	0.0202792	0.00407136	0.0340734
17	103	826.62	0.0269932	0.0391546	0.0302061	0.0306249	0.021088	0.00377408	0.0334478
17	104	831.978	0.0285649	0.0445716	0.0320164	0.0324254	0.0216373	0.00415022	0.0355383
17	105	552.26	0.0253605	0.0340734	0.027291	0.0274968	0.0187991	0.0023919	0.0292058
17	106	1477.52	0.0403296	0.196201	0.0611478	0.0504463	0.0226291	0.0313985	0.0700847
17	107	1525.05	0.0417334	0.175952	0.0573111	0.0514992	0.0212863	0.0229724	0.0673457
17	108	844.261	0.0278935	0.0417182	0.0311536	0.0316625	0.0213626	0.00391213	0.0344549
17	109	777.102	0.0268254	0.0406653	0.0301342	0.0304875	0.0205234	0.00383937	0.0334325
17	110	1418.42	0.0355001	0.169802	0.0527883	0.0461433	0.0212253	0.0239818	0.0638132
17	111	894.129	0.0284428	0.0416114	0.0316114	0.0320439	0.0211643	0.00387566	0.0348974
18	1	599.073	0.0261845	0.0361181	0.028419	0.0285954	0.0189822	0.00283774	0.0306859
18	2	1697.7	0.0560922	0.0955367	0.064424	0.0668956	0.0222171	0.0137037	0.0753185
18	3	1570.15	0.0515908	0.141024	0.0653656	0.0632181	0.0226444	0.0203428	0.0769055
18	4	1507.89	0.039704	0.158175	0.0579934	0.0509499	0.0217746	0.0260833	0.0680095
18	5	865.512	0.0299229	0.047303	0.03305	0.0335699	0.0208286	0.00402112	0.0363775
18	6	2473.06	0.0420386	0.154391	0.0540265	0.0500801	0.0216678	0.0185758	0.060853
18	7	877.5	0.0302281	0.0465553	0.0333055	0.0339971	0.0220035	0.00414815	0.0366064
18	8	737.573	0.0270848	0.0386053	0.0299547	0.0301823	0.0207828	0.00354275	0.0328985
18	9	1679.67	0.0467079	0.197833	0.0656892	0.0608988	0.0221256	0.0264826	0.0773327
18	10	864.181	0.0296483	0.0682536	0.0327664	0.0333104	0.0209201	0.00408975	0.0361028
18	11	2126.84	0.0339055	0.186633	0.0475313	0.0425116	0.0201877	0.0210624	0.0529488
18	12	913.072	0.0302739	0.0491188	0.0337363	0.0343938	0.022034	0.00441322	0.037232
18	13	1517.5	0.0466392	0.154269	0.0650923	0.0601205	0.0218051	0.0241079	0.0814832
18	14	1615.31	0.0451667	0.172488	0.0631301	0.0604791	0.0215305	0.0230047	0.0788281
18	15	1658.81	0.0457618	0.156069	0.0626817	0.0581521	0.0227665	0.0239715	0.0731518
18	16	839.907	0.0281376	0.0405585	0.0313211	0.0319066	0.0206607	0.00397011	0.0346227
18	17	1693.55	0.0442664	0.213306	0.0635215	0.0568093	0.0227054	0.0271157	0.0760204
18	18	1620.34	0.0510414	0.0898146	0.0593052	0.061677	0.0230106	0.0131437	0.0699168
18	19	954.613	0.0292515	0.0442664	0.0327944	0.0333104	0.0208591	0.00444447	0.0364538
18	20	812.291	0.0290074	0.0413825	0.0320355	0.0324712	0.0213016	0.00386248	0.0352636
18	21	866.353	0.0298772	0.0429541	0.0330089	0.0334936	0.0205081	0.00403832	0.036347
18	22	806.932	0.0293126	0.0417029	0.0324917	0.033051	0.0204013	0.00415514	0.0359655
18	23	873.305	0.0290074	0.0499886	0.0321139	0.032578	0.0208133	0.00392629	0.0353704
18	24	1575.28	0.0441749	0.180941	0.0585955	0.0561074	0.0229648	0.0217077	0.0655375
18	25	1635.24	0.0436561	0.179126	0.0638542	0.0564279	0.0222019	0.0281662	0.0761692
18	26	799.952	0.0278935	0.0411688	0.0309256	0.0314641	0.0186313	0.00383965	0.0341344
18	27	879.285	0.0289006	0.0417792	0.0322733	0.0327459	0.0212863	0.00414476	0.0357824
18	28	855.184	0.0302434	0.0441749	0.0338995	0.0345235	0.020798	0.00460485	0.0376593
18	29	867.222	0.0294804	0.0509499	0.0325131	0.0330663	0.0215457	0.00398195	0.0357671
18	30	870.131	0.0284123	0.0424048	0.0316158	0.0320897	0.0209506	0.00392657	0.0349432
18	31	833.078	0.0288853	0.0430762	0.0320921	0.0324712	0.0215763	0.00399378	0.035462
18	32	1642.54	0.05037	0.21445	0.0652889	0.0619974	0.0230259	0.0260847	0.0716259
18	33	1589.66	0.032166	0.0556191	0.0357846	0.0369268	0.0223392	0.00498189	0.0400397
18	34	1657.09	0.0434577	0.245319	0.0615126	0.0548409	0.021912	0.0294773	0.0695201
18	35	863.132	0.0288396	0.0429999	0.0322883	0.0327764	0.0198367	0.0042702	0.035874
18	36	876.04	0.0296941	0.0464485	0.0329512	0.0334783	0.0208591	0.00411706	0.036408
18	37	837.629	0.0288701	0.0416419	0.031962	0.0324865	0.0212558	0.00387289	0.0352026
18	38	1558.55	0.0501869	0.147051	0.061705	0.0628367	0.0215457	0.0166747	0.0735637
18	39	939.209	0.0297932	0.058381	0.0334643	0.033875	0.0219883	0.00452974	0.0370947
18	40	841.475	0.0286717	0.0499886	0.032137	0.032578	0.0215305	0.0042145	0.0357061
18	41	822.41	0.0285954	0.0418555	0.0318098	0.0322271	0.0211032	0.00396154	0.0351568
18	42	872.255	0.0287633	0.0413367	0.0318772	0.0323796	0.0214084	0.00386792	0.0351568
18	43	1715.44	0.0475319	0.198062	0.0673382	0.0611582	0.0230716	0.0280817	0.0799268
18	44	845.909	0.0293736	0.042771	0.0323248	0.0328832	0.0202945	0.00392245	0.0354772
18	45	850.407	0.0286717	0.0404822	0.0317411	0.0323339	0.0204318	0.00391182	0.03505
18	46	1673.69	0.0327611	0.0873426	0.0360398	0.0370031	0.0223239	0.00457077	0.039765
18	47	922.011	0.0300603	0.0467079	0.0333205	0.033875	0.0218509	0.00414975	0.036759
18	48	887.539	0.0282902	0.0487526	0.0315547	0.0320134	0.0203708	0.00397677	0.0349279
18	49	826.192	0.0280308	0.0408026	0.0312265	0.0316777	0.0212406	0.00392068	0.0345312
18	50	933.605	0.0319371	0.0581826	0.0353812	0.0358434	0.0221561	0.00468682	0.0390364
18	51	885.673	0.0285191	0.0614176	0.0320908	0.0325322	0.0209201	0.00440326	0.0356756
18	52	1637.88	0.0457008	0.213382	0.0629832	0.0568093	0.0226444	0.0250817	0.0749943
18	53	1766.55	0.0482643	0.218555	0.070869	0.0625162	0.0230411	0.0316104	0.0852674
18	54	1586.64	0.0429389	0.195209	0.0619392	0.0545815	0.0222477	0.0265302	0.0772869
18	55	867.477	0.0287938	0.0417182	0.031923	0.032517	0.0202487	0.00391815	0.035172
18	56	914.308	0.0306859	0.0795911	0.0344398	0.0349584	0.0214542	0.00467089	0.0381628
18	57	1730.41	0.0514839	0.205722	0.0706551	0.0663462	0.0230106	0.0277692	0.0829023
18	58	850.11	0.0288548	0.0509194	0.0319458	0.0324102	0.0212253	0.0039791	0.0352331
18	59	1716.95	0.0605936	0.183841	0.0723687	0.0715953	0.0228428	0.0189438	0.0828679
18	60	885.218	0.0279088	0.0451209	0.03125	0.0317082	0.0194858	0.00407436	0.034699
18	61	1516.85	0.0408713	0.187488	0.0603699	0.0535286	0.0218357	0.0286015	0.06981
18	62	930.765	0.0289464	0.0429999	0.0325078	0.0329442	0.0217288	0.00433657	0.0361791
18	63	875.642	0.0291905	0.0481117	0.0324156	0.0329137	0.0212863	0.00401484	0.0357977
18	64	955.25	0.0320439	0.0651865	0.0357183	0.0360723	0.0226444	0.00475961	0.0398718
18	65	1564.33	0.0524605	0.0923171	0.062153	0.0638437	0.0230259	0.0146185	0.074342
18	66	950.311	0.0302892	0.0463264	0.0341507	0.0346075	0.0219577	0.0047709	0.0380865
18	67	1666.21	0.0482795	0.19556	0.0657229	0.0597391	0.0230106	0.0256106	0.0781567
18	68	977.603	0.0319677	0.0557259	0.0354268	0.0360113	0.0226444	0.00462416	0.039292
18	69	828.268	0.0298314	0.0519722	0.0326875	0.0333715	0.0206302	0.00388264	0.0358129
18	70	813.543	0.0283513	0.0413367	0.0316001	0.0321508	0.0210117	0.00397868	0.0349889
18	71	884.103	0.0280156	0.0479438	0.0314158	0.0319524	0.0210117	0.00405523	0.0348516
18	72	771.392	0.0287022	0.0483406	0.0315821	0.0319371	0.0207065	0.00375611	0.0346685
18	73	835.799	0.0283055	0.0447852	0.0315765	0.0320134	0.0206912	0.00391945	0.0349126
18	74	1701.38	0.0462654	0.238666	0.0666606	0.0562753	0.0230106	0.0339028	0.0728466
18	75	894.669	0.0291752	0.0440375	0.0327358	0.0332799	0.0215	0.00432741	0.0364691
18	76	862.333	0.0289921	0.0420081	0.0324405	0.0329595	0.0208286	0.00424606	0.0360418
18	77	834.417	0.0287022	0.0417029	0.031904	0.0323186	0.0212558	0.00392496	0.0352483
18	78	1599.15	0.0472992	0.228779	0.0683191	0.0606699	0.0230411	0.0307953	0.0785229
18	79	1493.99	0.0422522	0.245823	0.0618784	0.0543832	0.0230106	0.028565	0.0736553
18	80	820.457	0.0279698	0.0400854	0.0312329	0.0317845	0.0204929	0.00390445	0.0345922
18	81	871.595	0.0285191	0.046128	0.0316944	0.0322728	0.0211337	0.00387623	0.0348974
18	82	859.655	0.0286564	0.0508278	0.03275	0.0331121	0.0207828	0.00484115	0.0368811
18	83	2680.6	0.0442206	0.194995	0.0643494	0.0598917	0.0216526	0.026665	0.0801556
18	84	914.284	0.0285954	0.0466926	0.0319523	0.0323796	0.0203861	0.00413851	0.0355077
18	85	854.151	0.0294041	0.042649	0.0325863	0.0332036	0.0197147	0.00406747	0.0360266
18	86	1529.06	0.0496986	0.175784	0.0597803	0.0603494	0.0230106	0.0157026	0.0701152
18	87	833.983	0.0280156	0.0405737	0.0311769	0.0316625	0.0206912	0.00392397	0.0345312
18	88	847.468	0.0291142	0.0435035	0.0321023	0.0326085	0.0211337	0.00376812	0.0352636
18	89	830.24	0.029099	0.0455329	0.0321213	0.0326848	0.0205234	0.00398002	0.0354467
18	90	860.177	0.0284428	0.0417029	0.0315812	0.0320134	0.0211032	0.00387844	0.0348669
18	91	818.759	0.0286717	0.0479133	0.0317361	0.0323339	0.0211032	0.00386321	0.0349737
18	92	1563.51	0.0519875	0.0849622	0.0596306	0.0618296	0.0230106	0.0124689	0.0696269
18	93	2738.46	0.0549783	0.186679	0.0679838	0.0676738	0.022446	0.0208587	0.0768749
18	94	674.935	0.0264591	0.0367742	0.0289151	0.0292363	0.0206302	0.00305691	0.0314641
18	95	888.328	0.0290532	0.0421607	0.0319796	0.0327001	0.0210727	0.00380313	0.0351263
[truncated: 4,902 more rows]
